# Supplementary material for: Gun Possession among American Youth: A Discovery-Based Approach to Understand Gun Violence
Source: PLoS One. 2014 Nov 5;9(11):e111893. doi: 10.1371/journal.pone.0111893 (PMC4221159; doi:10.1371/journal.pone.0111893)
Supplement: Table S1 — YRBSS Question Information. (A) Survey question information, including the answer number indicating a “No” response (1 corresponds to A; 2 to B), the survey question number in 2001–2011, whether or not the question was reverse coded, the response format for each question and the % of subjects who did not respond (% missing). (B) Response format key worksheet. (XLSX) [file pone.0111893.s009.xlsx]

## Sheet: Table S1A
		Survey Number								% Missing
Question	"No" #	2011	2009	2007	2005	2003	2001	Reverse Code	Response Format	2011	2009	2007	2005	2003	2001
How often do you wear sunscreen on a sunny day?	1	94	95	95	94	95	95	Yes	13	16.2341	11.4303	15.7721	13.4036	11.0847	23.8898
How many glasses of milk did you have in the past 7 days?	1	90	79	79	77	79	79	Yes	7	1.26461	3.08926	1.85385	3.15505	1.43815	20.013
How many times have you had other vegetables in the past 7 days?	1	77	77	77	76	78	78	Yes	7	4.65407	3.08926	4.65618	4.38003	1.1883	4.54457
How many times have you had carrots in the past 7 days?	1	76	76	76	75	77	77	Yes	7	4.52173	1.92586	4.59151	4.39427	1.13955	5.92545
How many times have you had potatoes in the past 7 days?	1	75	75	75	74	76	76	Yes	7	4.57319	2.09675	4.59151	4.21622	1.13346	5.91896
How many times have you had green salad in the past 7 days?	1	74	74	74	73	75	75	Yes	7	3.99235	1.59064	4.63462	4.23759	1.15783	4.3047
How many times have you had fruit in the past 7 days?	1	73	73	73	72	74	74	Yes	7	1.544	1.48547	4.39031	1.05406	1.0847	4.70665
How many times have you had fruit juice in the past 7 days?	1	72	72	72	71	73	73	Yes	7	1.48518	1.51177	4.4478	1.03981	1.4808	4.38898
Did you vomit to lose weight in the past 30 days?	2	71	71	71	70	72	72	No	6	1.38225	2.7409	1.61673	2.17933	1.88909	2.10049
Did you take a pill to lose weight in the past 30 days?	2	70	70	70	69	71	71	No	6	1.10286	2.57657	1.27901	5.02813	1.76722	1.87358
Did you fast to lose weight in the past 30 days?	2	69	69	69	66	70	70	No	6	2.08808	3.02353	1.36524	5.75458	1.79768	2.31442
How many hours do you watch TV?	1	80	81	81	81	83	83	No	4	2.6101	3.63481	1.91852	1.53835	1.73065	2.69044
On how many sports teams have you participated in the past 12 months?	1	83	84	84	84	86	86	Yes	3	2.9042	5.3832	5.1376	3.88149	5.16758	3.46191
How many days do you go to PE class?	1	82	83	83	82	84	84	Yes	2	8.80818	11.9627	9.92312	2.76334	5.07008	3.4295
Have you been offered drugs at school in the past 12 months?	2	59	57	57	56	57	57	No	9	0.955812	1.7944	0.912553	1.50274	0.907983	1.80875
Have you used ecstasy one more more times?	1	55	54	54	53	54	90	No	11	16.9326	2.05074	0.718546	1.80187	3.18708	7.48784
How many times have you injected drugs?	1	58	56	56	55	56	56	No	12	0.573487	1.35402	0.862255	1.41728	1.64534	8.8363
How many times have you used steroids?	1	56	55	55	54	55	55	No	11	0.514668	1.11739	0.682618	1.40303	0.548446	3.89627
How many times have you used methamphetamines?	1	54	53	53	52	53	54	No	11	0.573487	0.815039	0.847884	1.5526	0.737355	3.18963
How many times have you used heroin?	1	53	52	52	51	52	53	No	11	1.02934	0.828185	1.99037	1.44577	4.13772	8.79092
How many times have you used cocaine in the past 30 days?	1	51	50	50	49	49	50	No	11	3.96294	1.21599	4.25379	5.86853	5.19805	6.41815
How many times have you ever used cocaine?	1	50	49	49	48	48	49	No	11	0.985222	2.60944	1.07782	1.77338	1.25533	1.86062
How many times have you used marijuana at school in the past 30 days?	1	49	48	48	47	47	48	No	11	1.33078	2.93808	1.54487	2.30041	1.97441	5.10211
How many times have you used marijuana in the past 30 days?	1	48	47	47	46	46	47	No	11	1.74252	2.78033	1.96163	2.68499	1.81597	2.94976
How old were you when you first tried marijuana?	1	47	46	46	45	45	46	No	8	1.63959	3.24701	1.7317	2.45709	1.6819	2.55429
How many times have you smoked marijuana?	1	46	45	45	44	44	45	No	10	1.93368	2.43197	2.11252	2.9129	2.13285	3.24149
How often have you driven while drinking in the past 30 days?	1	11	11	11	11	11	12	No	14	2.11749	2.01131	2.85263	2.89865	1.76112	2.1718
How often have you ridden with a driver who has been drinking in the past 30 days?	1	10	10	10	10	10	11	No	1	0.257334	1.58407	0.323346	4.45125	0.383912	3.3517
How often do you wear a seat belt?	1	9	9	9	9	9	10	Yes	13	0.727888	0.7033	0.179636	1.06118	1.15783	3.14425
How many days did you drink alcohol at school in the past 30 days?	1	45	44	44	43	43	44	No	9	1.5293	2.80663	2.96041	2.52119	2.35222	2.54133
How many times have you had 5+ drinks in the past 30 days?	1	43	42	42	42	42	43	No	9	2.1469	3.33903	2.11252	3.22627	2.44363	3.04052
How many days did you drink alcohol in the past 30 days?	1	42	41	41	41	41	42	No	9	5.42607	7.02642	4.90048	9.77138	9.42108	9.60778
How many days have you ever had at least one drink of alcohol?	1	40	39	39	39	39	40	No	10	10.7198	10.6941	13.0344	8.78143	2.78489	8.14911
How many days have you smoked cigars in the past 30 days?	1	39	38	38	38	38	39	No	9	2.02191	1.05824	4.2969	4.00969	4.50335	5.56888
How many days have you used snuff on school property in the past 30 days?	1	38	37	37	37	37	38	No	9	4.94817	1.94558	8.86685	7.91254	2.65692	9.80875
How many days did you use snuff in the past 30 days?	1	37	36	36	36	36	37	No	9	4.91876	3.22072	4.7424	4.42988	1.6819	2.96921
Have you ever smoked daily?	2	35	34	34	34	34	35	No	6	7.6465	4.31839	5.52562	3.87437	5.96587	9.62723
How many days did you smoke at school in the past 30 days?	1	34	33	33	33	33	34	No	9	1.62488	3.87143	4.77833	3.17641	3.40646	6.07455
How many days have you smoked in the past 30 days?	1	31	30	30	30	30	30	No	9	4.71289	5.77757	4.54839	5.1136	3.94881	4.42139
Have you ever smoked?	2	29	28	28	28	28	28	No	6	2.66892	3.12212	5.38191	3.13368	3.18099	13.3938
How many times have you attempted suicide in the past 12 months?	1	27	26	26	26	26	26	No	1	12.0726	13.5665	10.7063	11.089	10.975	12.389
Have you ever made a plan to commit suicide in the past 12 months?	2	26	25	25	25	25	25	No	6	1.44107	0.861049	0.905368	1.70216	1.20049	0.952998
Have you ever considered suicide in the past 12 months	2	25	24	24	24	24	24	No	6	0.507316	0.368082	0.682618	1.2962	1.15783	0.855754
Have you ever felt sad or hopeless in the past 12 months	2	24	23	23	23	23	23	No	6	0.441144	1.94558	0.977222	1.39591	1.0847	1.01135
Have you ever had sex?	2	60	58	58	57	58	58	No	6	5.09521	13.0801	11.1878	6.65907	8.19622	7.0081
Have you ever been forced to have sex?	2	21	21	22	22	22	22	No	6	4.76436	6.51374	6.23698	1.58821	4.11335	1.46515
Did your boyfriend or girlfriend ever hit or slap you in the past 12 months?	2	20	20	21	21	21	21	No	6	1.38225	1.69581	0.732917	1.46713	1.17611	1.00486
How many times have you been in a fight at school in the past 12 months?	1	19	19	20	20	20	20	No	5	1.16168	3.4179	1.12093	2.06538	1.95612	1.57536
How many times have you been injured in a fight in the past 12 months?	1	18	18	19	19	19	19	No	1	1.61753	0.95307	1.04908	2.53543	4.02803	5.54295
How many times have you been in a fight in the past 12 months?	1	17	17	18	18	18	18	No	5	1.66164	3.7334	1.50895	2.28616	1.70628	2.06807
How many times have you been threatened at school in the past 12 months?	1	16	16	16	16	16	17	No	5	0.161753	0.230051	0.165266	1.04693	0.262035	0.525122
How many days have you felt unsafe at school in the past 30 days?	1	15	15	15	15	15	16	No	1	0.198515	0.29578	0.251491	1.04693	0.23766	0.680713
Have you carried a weapon at school in the past 30 days?	1	14	14	14	14	14	15	No	1	1.13962	1.09767	1.12812	2.14372	0.938452	3.23501
Have you carried a gun in the past 30 days?	1	13	13	13	13	13	14	No	1	3.59532	2.87893	4.2969	4.87857	4.54601	5.95138
Have you carried a weapon in the past 30 days?	1	12	12	12	12	12	13	No	1	3.00713	4.33811	1.94726	3.03397	1.82815	2.59968

## Sheet: Table S1B
Reponse #	11	B	C	D	E	F	G	H
1	0 days/times	1 day/time	2 or 3 days/times	4 or 5 days/times	6 or more days/times
2	0 days	1 day	2 days	3 days	4 days	5 days
3	0 teams	1 team	2 teams	3 teams
4	Never	< 1 Hour	1 Hour	2 Hours	3 Hours	4 Hours	5+ Hours
5	0 time	1 time	2 or 3 times	4 or 5 times	6 or 7 times	8 or 9 times	10 or 11 times	12 or more times
6	Yes	No
7	Never	1-3 Times	4-6 Times	1 Time	2 Times	3 Times	4+ Times
8	N/A	8 Years or younger	9 or 10 years	11 or 12 years	13 or 14 years	15 or 16 years	17+ years
9	0 Days	1 or 2 Days	3-5 Days	6-9 Days	10-19 Days	20-29 Days	All 30 Days
10	0 Days/Times	1 or 2 Days/Times	3-9 Days/Times	10-19 Days/Times	20-39 Days/Times	40-99 Days/Times	100+ Days/Times
11	0 Days	1 Days	2 Days	3-5 Days	6-9 Days	10-19 Days	20+ Days
12	0 Times	1 or 2 Times	3-9 Times	10-10 Times	20-39 Times	40+ Times
13	Never	Rarely	Sometimes	Most of the Time	Always
14	N/A	0 days/times	1 day/time	2 or 3 days/times	4 or 5 days/times	6 or more days/times
