# Supplementary material for: Gun Possession among American Youth: A Discovery-Based Approach to Understand Gun Violence
Source: PLoS One. 2014 Nov 5;9(11):e111893. doi: 10.1371/journal.pone.0111893 (PMC4221159; doi:10.1371/journal.pone.0111893)
Supplement: Table S3 — YRBSS Odds Ratio Matrices (2001–2011). Normalized and raw odds ratio matrices for all pairwise variable comparisons for all 55 survey questions for each year. (XLSX) [file pone.0111893.s011.xlsx]

## Sheet: 2011 Raw OR
Question #	Questions	Carried a weapon	Carried a gun*	Carried weapon at school	Felt unsafe at school*	Been threatened at school^	Been in fight^	Injured in a fight*	Been in fight at school^	Physically injured by boyfriend/girlfriend*	Forced to have sex	Has felt sad/hopeless *	Has considered suicide ^	Made a plan to commit suicide ^	Times attempted suicide *	Days had at least 1 drink of alcohol	Drank alcohol*	Had 5+ alcoholic drinks*	Drank alcohol at school*	Smoked marijuana	Age when first tried marijuana	Used marijuana*	Used marijuana at school*	Has ever used cocaine	Has used cocaine*	Has ever used heroin	Has ever used methamphetamines	Has ever used steroids	Has ever used injected drugs	Has ever used ecstasy	Does not go to PE class+	Has not participated in sports^	Watches TV	Has fasted to lose weight *	Has taken pill to lose weight *	Has vomited to lose weight*	No fruit juice+	No fruit+	No green salad+	No potatoes+	No carrots	No vegetables+	No milk+	Does not wear seatbelt	Ridden with drunk driver *	Has driven while drinking*	Does not wear sunscreen	Has ever smoked	Has smoked*
1	'Does not wear sunscreen'	1.60719	1.55962	1.53561	1.26831	1.25812	1.60839	1.37079	1.66032	1.49371	1.13402	1.1005	1.22052	1.18138	1.3207	1.3313	1.34897	1.36367	1.86912	1.57984	1.58346	1.53399	1.7531	1.62125	1.61312	1.51159	1.25741	1.41199	1.57232	1.39321	1.08399	1.45117	0.928621	1.20643	1.17291	1.13019	1.48538	1.85034	1.74882	1.3672	1.65805	1.79429	1.5376	2.12676	1.41719	1.4705	Inf	1.67965	1.51114
2	'No milk+'	0.811006	0.819896	1.04621	1.30715	1.0781	0.976603	1.10571	0.936562	1.55081	1.58073	1.23602	1.22848	1.24098	1.3157	0.942886	1.0249	1.03219	1.32141	1.1248	1.12209	1.13403	1.02222	1.09457	1.14544	1.2243	1.34335	1.21084	1.43901	1.10919	1.4394	1.62816	0.662487	1.49965	1.44367	1.61349	2.2528	2.78674	1.65712	1.72822	2.08638	2.19719	Inf	1.60911	1.15242	0.983731	1.5376	1.11194	1.02797
3	'No vegetables+'	1.18942	1.31228	1.37333	1.3824	1.19703	1.11738	1.31489	1.21524	1.39471	1.27349	0.987966	1.13721	1.25625	1.30062	0.876198	0.950921	0.980903	1.31174	1.0061	1.00356	1.05287	1.37919	1.2404	1.53908	1.66162	1.49208	1.52401	1.67951	1.11827	1.1127	1.67208	0.756179	1.22241	1.29299	1.3792	2.62854	5.06818	4.30656	3.08548	5.09763	Inf	2.19719	2.32336	1.12539	1.21041	1.79429	1.08013	1.06785
4	'No carrots'	0.783189	0.713837	0.740329	0.873535	0.841036	0.940996	0.763124	0.858025	1.01607	1.05922	1.02656	1.08734	1.08667	0.934799	1.01612	0.920738	0.819401	0.850321	1.03298	1.03222	0.913593	0.782509	0.768675	0.612781	0.494918	0.647626	0.661913	0.576036	0.728097	1.28776	1.45789	1.05037	0.997322	0.899175	0.918206	2.10363	3.61854	3.47078	2.57145	Inf	5.09763	2.08638	1.02198	0.987145	0.788085	1.65805	1.01494	0.936328
5	'No potatoes+'	0.699515	0.603067	0.702898	0.946832	0.848829	0.793301	0.838835	0.742143	1.00654	1.00388	0.997404	1.07712	1.10569	1.04916	0.861938	0.782859	0.716997	0.806302	0.85903	0.862255	0.784384	0.753841	0.745365	0.658116	0.685501	0.755972	0.73054	0.85564	0.676761	1.21131	1.59833	0.752011	1.02128	1.03335	1.13274	2.15712	2.56134	2.31598	Inf	2.57145	3.08548	1.72822	1.11229	0.894661	0.750645	1.3672	0.846453	0.742494
6	'No green salad+'	0.970628	0.901249	1.00016	0.951759	0.952132	0.99022	0.907571	0.973902	0.981973	0.940427	0.97428	1.05218	1.07092	0.984741	0.922467	0.816062	0.771156	0.975782	0.989744	0.985989	0.945894	0.912316	0.970312	0.775025	0.726921	0.778523	0.771548	0.805028	0.813757	1.20427	1.53143	0.920664	0.927083	0.667035	0.851102	2.15591	3.75522	Inf	2.31598	3.47078	4.30656	1.65712	1.15003	0.889716	0.817902	1.74882	1.02416	0.892965
7	'No fruit+'	1.08095	1.1393	1.35215	1.4079	1.51971	1.00733	1.55652	1.32756	1.3691	1.44782	1.03042	1.17804	1.30002	1.3147	0.788908	0.78428	0.858727	1.36922	0.969637	0.974029	0.973058	1.25736	1.18768	1.39856	2.168	1.68851	1.74106	2.06551	1.1532	1.28858	2.00505	0.647853	1.24945	1.26921	1.72664	3.69212	Inf	3.75522	2.56134	3.61854	5.06818	2.78674	2.09425	1.03318	0.975726	1.85034	1.05942	1.02854
8	'No fruit juice+'	0.930346	0.892632	1.19299	1.0093	1.02662	0.822339	0.962452	0.916267	1.13782	1.12834	0.999045	1.13883	1.1989	1.0155	0.813028	0.765224	0.733172	0.999223	0.861568	0.869146	0.813108	0.966406	1.01666	1.17116	1.43406	1.28843	1.16029	1.39468	0.989301	1.39019	1.75904	0.697577	1.25476	1.14579	1.45494	Inf	3.69212	2.15591	2.15712	2.10363	2.62854	2.2528	1.81868	0.826933	0.888323	1.48538	0.962231	0.924849
9	'Has vomited to lose weight*'	2.17712	2.93368	3.85454	4.47065	4.51022	2.17255	4.89657	2.44974	3.78971	5.43049	3.85727	5.06252	5.69469	6.72798	2.80101	2.75302	2.91105	4.34629	2.05191	2.05138	2.3415	3.64382	4.3257	6.48367	9.80775	7.30918	8.98342	10.836	4.37912	1.03369	1.25869	0.621289	14.0504	19.2671	Inf	1.45494	1.72664	0.851102	1.13274	0.918206	1.3792	1.61349	4.55797	2.81864	3.51936	1.13019	3.1376	3.00651
10	'Has taken pill to lose weight *'	1.82304	2.9683	3.38964	3.96549	3.90669	2.15991	4.09361	2.48338	3.37957	4.65718	2.68353	3.13097	3.39293	4.44567	3.03608	2.99846	3.03523	3.39785	2.30428	2.35163	2.24335	3.20366	4.48289	7.25812	7.99875	6.97262	8.45446	8.21051	4.29399	1.12786	1.08898	0.747473	8.22703	Inf	19.2671	1.14579	1.26921	0.667035	1.03335	0.899175	1.29299	1.44367	3.82389	2.37832	3.69412	1.17291	3.35778	3.18179
11	'Has fasted to lose weight *'	1.58819	1.71165	2.43437	3.26359	3.04519	1.81564	2.9622	1.70623	2.54385	3.75047	4.33527	4.54254	4.15172	5.45013	2.09827	2.04358	2.05973	2.96151	1.66248	1.68374	1.80236	2.20141	2.63864	3.11434	4.36899	3.71895	4.02635	4.52433	2.69271	1.14658	1.30243	0.705464	Inf	8.22703	14.0504	1.25476	1.24945	0.927083	1.02128	0.997322	1.22241	1.49965	2.87644	1.94944	2.16174	1.20643	2.24515	2.49185
12	'Watches TV'	1.01357	1.21887	0.959862	0.919905	0.8288	1.20159	0.965504	1.26638	0.807572	0.594137	0.832448	0.757566	0.702101	0.788956	1.30329	1.18579	1.09455	1.10766	1.15491	1.15604	1.13518	0.955374	0.977339	1.01354	1.09058	0.858365	0.991648	1.06537	0.889204	0.78372	0.794343	Inf	0.705464	0.747473	0.621289	0.697577	0.647853	0.920664	0.752011	1.05037	0.756179	0.662487	0.543029	1.12054	1.28979	0.928621	1.04596	1.06121
13	'Has not participated in sports^'	0.941948	0.72707	0.989026	1.13597	0.91574	0.780198	0.823547	0.72278	1.09246	1.29267	1.43627	1.33873	1.30996	1.25575	0.946754	0.979276	0.95405	1.07345	1.11413	1.12132	1.0707	0.996841	1.22332	0.902009	0.878668	1.07228	0.732636	0.815688	1.17073	2.07745	Inf	0.794343	1.30243	1.08898	1.25869	1.75904	2.00505	1.53143	1.59833	1.45789	1.67208	1.62816	1.31176	1.00494	0.829106	1.45117	1.30856	1.36005
14	'Does not go to PE class+'	0.85509	0.749926	0.869265	0.823455	0.830329	0.796098	0.777196	0.648115	1.0739	1.11528	1.18401	1.09952	1.03718	0.950478	1.17728	1.08973	1.04607	0.79927	1.08755	1.08514	0.972742	0.890552	1.04635	0.762564	0.72664	0.827151	0.721623	0.745742	1.06227	Inf	2.07745	0.78372	1.14658	1.12786	1.03369	1.39019	1.28858	1.20427	1.21131	1.28776	1.1127	1.4394	1.01349	1.00478	1.07428	1.08399	1.2343	1.25063
15	'Offered drugs at school ^'	2.53013	3.22055	4.46045	2.01817	3.22501	2.5296	2.9023	2.51726	2.42802	2.46582	1.91613	2.25686	2.22858	2.29346	3.0964	2.77971	2.83477	5.62979	3.31135	3.30626	3.40006	8.73184	5.14269	7.26587	5.41418	5.06857	4.67061	5.55088	4.84393	0.992397	1.0669	1.04084	1.81873	2.34792	2.52698	0.937414	0.984169	1.06911	0.9043	0.957027	1.10012	0.986283	2.1903	2.40116	2.98578	1.26808	3.11388	3.05475
16	'Has ever used ecstasy'	4.76706	7.08451	7.75812	3.49951	4.66971	4.12825	6.39572	3.74625	3.52347	4.53558	2.37201	3.02894	3.20878	4.69556	17.8413	10.8589	8.69995	8.09107	43.1405	43.7244	12.0366	10.9692	31.9987	37.2268	52.8538	46.9176	16.5539	34.8044	Inf	1.06227	1.17073	0.889204	2.69271	4.29399	4.37912	0.989301	1.1532	0.813757	0.676761	0.728097	1.11827	1.10919	5.65065	4.55337	8.10189	1.39321	14.6795	10.0436
17	'Has ever used injected drugs'	10.0089	17.6506	17.9484	10.0198	13.7346	6.91764	17.8367	8.67895	7.65018	8.43305	3.01932	4.61986	5.5883	11.5071	4.8838	6.88139	6.84022	17.4132	9.65781	9.92582	9.32297	20.0961	45.2662	58.3969	285.327	86.6282	62.7728	Inf	34.8044	0.745742	0.815688	1.06537	4.52433	8.21051	10.836	1.39468	2.06551	0.805028	0.85564	0.576036	1.67951	1.43901	14.9884	4.8481	10.4063	1.57232	9.53624	10.5093
18	'Has ever used steroids'	6.27978	10.9087	12.6449	7.27562	9.09005	5.58793	11.2573	7.14217	5.61549	5.92858	2.85611	3.67552	4.41625	8.17027	8.93285	8.01061	6.45515	12.7893	9.64644	10.1642	7.82232	12.9987	18.0313	30.4749	58.5771	34.5187	Inf	62.7728	16.5539	0.721623	0.732636	0.991648	4.02635	8.45446	8.98342	1.16029	1.74106	0.771548	0.73054	0.661913	1.52401	1.21084	9.16075	4.90265	8.03262	1.41199	8.51989	7.8341
19	'Has ever used methamphetamines'	7.32231	12.4583	14.4457	6.14439	8.53917	6.57868	11.5232	6.65699	5.16241	6.1726	2.93413	4.37185	4.61571	8.6989	10.9965	10.9947	8.94812	13.0038	38.7168	39.6148	12.8501	15.2617	57.2614	61.7771	139.602	Inf	34.5187	86.6282	46.9176	0.827151	1.07228	0.858365	3.71895	6.97262	7.30918	1.28843	1.68851	0.778523	0.755972	0.647626	1.49208	1.34335	10.5516	4.75034	10.385	1.25741	14.4682	12.7192
20	'Has ever used heroin'	10.4383	17.6613	17.5659	10.0796	13.921	7.75723	16.3385	8.61291	6.71654	8.9333	2.92382	4.59376	5.75043	11.1163	9.49912	9.06126	7.45491	16.6219	18.3209	18.9278	12.5537	20.1187	91.7665	84.709	Inf	139.602	58.5771	285.327	52.8538	0.72664	0.878668	1.09058	4.36899	7.99875	9.80775	1.43406	2.168	0.726921	0.685501	0.494918	1.66162	1.2243	14.3795	5.34894	13.0055	1.51159	10.2011	13.4737
21	'Has used cocaine*'	8.26522	15.3333	15.2992	6.2943	8.92687	6.72307	11.734	7.06377	5.35028	5.76241	2.24718	3.51563	4.04081	7.61048	14.4555	19.6164	15.2679	18.7799	27.7872	28.2861	23.9193	21.0169	Inf	Inf	84.709	61.7771	30.4749	58.3969	37.2268	0.762564	0.902009	1.01354	3.11434	7.25812	6.48367	1.17116	1.39856	0.775025	0.658116	0.612781	1.53908	1.14544	12.2348	7.49892	14.6618	1.61312	15.5595	18.052
22	'Has ever used cocaine '	4.79387	7.68773	8.25744	3.86655	5.23596	4.52862	6.76683	3.8322	3.41198	4.43197	2.30706	3.10964	3.20101	4.98545	17.0768	9.07713	9.16045	9.05615	27.2138	27.5491	10.9222	11.473	Inf	Inf	91.7665	57.2614	18.0313	45.2662	31.9987	1.04635	1.22332	0.977339	2.63864	4.48289	4.3257	1.01666	1.18768	0.970312	0.745365	0.768675	1.2404	1.09457	6.43649	4.81234	8.92494	1.62125	16.4504	11.4425
23	'Used marijuana at school*'	5.46874	8.79913	10.2866	3.88002	5.40106	5.70097	7.26265	5.95221	3.69255	3.9563	1.94236	2.64888	2.57645	4.10892	13.8276	12.7427	8.15409	18.8502	Inf	Inf	Inf	Inf	11.473	21.0169	20.1187	15.2617	12.9987	20.0961	10.9692	0.890552	0.996841	0.955374	2.20141	3.20366	3.64382	0.966406	1.25736	0.912316	0.753841	0.782509	1.37919	1.02222	7.18308	4.5892	8.50495	1.7531	8.0023	8.24484
24	'Used marijuana*'	3.09483	4.11125	4.77496	2.14016	2.86906	3.43691	3.66461	2.85379	2.47346	2.65216	1.73147	1.97398	1.98913	2.73777	12.4753	10.7846	9.00239	8.81061	Inf	Inf	Inf	Inf	10.9222	23.9193	12.5537	12.8501	7.82232	9.32297	12.0366	0.972742	1.0707	1.13518	1.80236	2.24335	2.3415	0.813108	0.973058	0.945894	0.784384	0.913593	1.05287	1.13403	3.42926	3.52195	8.04089	1.53399	8.77654	10.6375
25	'Age when first tried marijuana'	2.70618	3.46604	4.01824	1.78478	2.46256	3.27369	3.44388	2.73098	2.53804	2.91741	1.82245	2.05928	1.97487	2.55854	12.8316	7.76095	9.08817	8.39985	Inf	Inf	Inf	Inf	27.5491	28.2861	18.9278	39.6148	10.1642	9.92582	43.7244	1.08514	1.12132	1.15604	1.68374	2.35163	2.05138	0.869146	0.974029	0.985989	0.862255	1.03222	1.00356	1.12209	2.49098	3.11049	9.1845	1.58346	12.6331	13.6675
26	'Smoked marijuana'	2.69154	3.42158	3.95273	1.72412	2.40175	3.25167	3.3934	2.69958	2.53679	2.91345	1.8208	2.04002	1.97576	2.52455	12.7923	7.70892	9.05614	8.38437	Inf	Inf	Inf	Inf	27.2138	27.7872	18.3209	38.7168	9.64644	9.65781	43.1405	1.08755	1.11413	1.15491	1.66248	2.30428	2.05191	0.861568	0.969637	0.989744	0.85903	1.03298	1.0061	1.1248	2.42032	3.08006	9.08612	1.57984	12.658	13.5984
27	'Has driven while drinking*'	4.13495	7.54751	6.95984	3.53515	4.58357	3.71661	5.96203	3.24904	3.37582	3.24974	1.8527	2.11636	2.27676	3.25423	Inf	Inf	21.7164	10.3252	9.08612	9.1845	8.04089	8.50495	8.92494	14.6618	13.0055	10.385	8.03262	10.4063	8.10189	1.07428	0.829106	1.28979	2.16174	3.69412	3.51936	0.888323	0.975726	0.817902	0.750645	0.788085	1.21041	0.983731	6.65489	10.8054	Inf	1.4705	8.61482	8.69827
28	'Ridden with drunk driver *'	2.54464	3.90023	3.59459	2.56655	2.97487	2.61738	3.43227	2.36002	2.50379	2.29072	1.6941	1.76219	1.70142	2.39581	4.67081	5.84733	5.61525	4.7196	3.08006	3.11049	3.52195	4.5892	4.81234	7.49892	5.34894	4.75034	4.90265	4.8481	4.55337	1.00478	1.00494	1.12054	1.94944	2.37832	2.81864	0.826933	1.03318	0.889716	0.894661	0.987145	1.12539	1.15242	4.01482	Inf	10.8054	1.41719	3.32544	3.94147
29	'Does not wear seatbelt'	5.30138	8.47589	7.22026	4.76872	5.54529	3.91335	6.68655	4.68567	4.12895	4.00826	1.80292	2.20613	2.43395	4.27399	1.4264	2.65527	3.10428	6.75055	2.42032	2.49098	3.42926	7.18308	6.43649	12.2348	14.3795	10.5516	9.16075	14.9884	5.65065	1.01349	1.31176	0.543029	2.87644	3.82389	4.55797	1.81868	2.09425	1.15003	1.11229	1.02198	2.32336	1.60911	Inf	4.01482	6.65489	2.12676	2.4449	3.74306
30	'Drank alcohol at school*'	4.93562	8.19232	10.148	3.96461	5.31205	5.00088	7.4807	5.74025	3.79542	4.47093	2.3152	3.22508	3.24082	5.04724	Inf	Inf	16.9326	Inf	8.38437	8.39985	8.81061	18.8502	9.05615	18.7799	16.6219	13.0038	12.7893	17.4132	8.09107	0.79927	1.07345	1.10766	2.96151	3.39785	4.34629	0.999223	1.36922	0.975782	0.806302	0.850321	1.31174	1.32141	6.75055	4.7196	10.3252	1.86912	5.93628	6.19638
31	'Had 5+ alcoholic drinks*'	3.10603	4.38147	4.86649	2.08419	2.79951	3.03714	3.84243	2.42951	2.55993	2.37051	1.79817	1.93376	1.98254	2.8439	Inf	Inf	Inf	16.9326	9.05614	9.08817	9.00239	8.15409	9.16045	15.2679	7.45491	8.94812	6.45515	6.84022	8.69995	1.04607	0.95405	1.09455	2.05973	3.03523	2.91105	0.733172	0.858727	0.771156	0.716997	0.819401	0.980903	1.03219	3.10428	5.61525	21.7164	1.36367	7.14701	9.38778
32	'Drank alcohol*'	3.06737	4.74116	4.84123	2.14353	2.86498	2.94247	3.8185	2.44437	2.72658	2.528	2.04037	2.19334	2.03751	2.80403	Inf	Inf	Inf	Inf	7.70892	7.76095	10.7846	12.7427	9.07713	19.6164	9.06126	10.9947	8.01061	6.88139	10.8589	1.08973	0.979276	1.18579	2.04358	2.99846	2.75302	0.765224	0.78428	0.816062	0.782859	0.920738	0.950921	1.0249	2.65527	5.84733	Inf	1.34897	6.39147	11.8005
33	'Days had at least 1 drink of alcohol'	3.26433	4.39654	5.29274	1.944	2.88339	3.08603	4.10023	2.46451	2.49214	3.05769	2.3628	2.69891	2.43486	2.83648	Inf	Inf	Inf	Inf	12.7923	12.8316	12.4753	13.8276	17.0768	14.4555	9.49912	10.9965	8.93285	4.8838	17.8413	1.17728	0.946754	1.30329	2.09827	3.03608	2.80101	0.813028	0.788908	0.922467	0.861938	1.01612	0.876198	0.942886	1.4264	4.67081	Inf	1.3313	9.88712	13.8952
34	'Smoked cigars*'	4.50674	6.08283	6.80673	2.79707	3.77254	3.59892	4.71088	3.11888	2.74624	2.60427	1.86729	2.08971	2.15289	3.29526	16.1658	10.9739	8.39754	6.71354	12.2137	12.2796	9.89947	8.81327	8.43621	13.1645	11.9433	9.38482	8.06771	11.958	8.00946	1.00026	0.980933	1.22371	2.12267	2.98088	2.80529	0.857836	1.12832	0.939799	0.672623	0.876037	1.11602	1.02699	4.03941	3.85419	7.5024	1.42207	17.9061	25.9238
35	'Has used snuff at school*'	9.60283	10.4171	12.4281	4.42947	5.4885	5.13836	7.09986	4.84979	3.0762	3.32189	1.38304	1.93535	2.21945	3.70314	10.4727	9.28536	10.2156	9.80796	6.3555	6.38753	5.38557	8.22027	10.8612	16.8884	22.5436	16.1659	15.2961	24.1975	8.63888	0.736426	0.592539	1.37073	2.04319	4.35206	3.7448	1.01277	1.24693	0.773833	0.540638	0.698675	1.03988	0.863722	7.37387	4.15021	9.7421	1.57742	11.0548	13.9113
36	'Used snuff*'	7.01268	8.28111	8.38894	3.2247	4.37979	3.74786	4.92162	3.54661	2.66745	2.74226	1.27399	1.74936	2.01837	2.84508	8.17503	7.43019	7.57083	6.43348	5.16798	5.20111	4.72915	5.9006	8.27865	13.0064	18.0165	12.7131	12.3338	17.2627	7.03178	0.786108	0.609518	1.30143	1.90517	3.7129	3.31163	0.96885	1.17239	0.782975	0.515673	0.754165	1.0377	0.766407	5.43829	3.5894	7.69982	1.35826	9.92594	10.933
37	'Has ever smoked cigarettes daily'	3.77564	4.48304	5.12681	2.72648	3.45163	3.37264	4.28699	2.59555	2.84024	3.84062	2.33299	2.73044	2.69124	3.86124	14.0495	7.58835	7.28769	5.47044	16.8446	16.6517	7.64921	6.42509	10.8019	10.607	12.838	12.0503	6.776	11.5924	10.5342	1.23767	1.78738	0.893119	2.54695	2.97863	3.32191	1.1257	1.3097	0.922456	0.811641	0.955859	1.18943	1.11067	4.77549	3.44917	6.23713	1.68141	Inf	43.2307
38	'Smoked cigarettes at school*'	6.36445	9.53255	11.4583	4.66942	5.51453	6.37076	7.35484	5.44199	3.8713	4.64281	2.57824	3.18877	3.26122	5.18954	19.787	16.5913	11.3614	12.5526	24.5164	24.8462	15.2123	20.7986	13.527	19.5975	16.2013	15.5425	11.2513	16.8633	12.2933	1.17517	1.37997	0.92786	2.83278	3.49109	4.77941	1.08697	1.38261	1.01844	0.718201	0.973135	1.46073	1.34284	7.55445	5.72713	9.92733	1.70193	Inf	Inf
39	'Has smoked*'	3.77344	4.77118	5.47771	2.44141	2.99291	3.52989	3.66376	2.8964	2.63797	3.2867	2.19015	2.43768	2.34283	3.36431	13.8952	11.8005	9.38778	6.19638	13.5984	13.6675	10.6375	8.24484	11.4425	18.052	13.4737	12.7192	7.8341	10.5093	10.0436	1.25063	1.36005	1.06121	2.49185	3.18179	3.00651	0.924849	1.02854	0.892965	0.742494	0.936328	1.06785	1.02797	3.74306	3.94147	8.69827	1.51114	Inf	Inf
40	'Has ever smoked'	3.03925	3.27856	4.70353	2.2408	2.84121	2.9486	3.1672	2.44948	2.80042	3.61989	2.159	2.13732	2.10372	2.91304	9.88712	6.39147	7.14701	5.93628	12.658	12.6331	8.77654	8.0023	16.4504	15.5595	10.2011	14.4682	8.51989	9.53624	14.6795	1.2343	1.30856	1.04596	2.24515	3.35778	3.1376	0.962231	1.05942	1.02416	0.846453	1.01494	1.08013	1.11194	2.4449	3.32544	8.61482	1.67965	Inf	Inf
41	'Times attempted suicide *'	2.59591	3.50723	4.79849	5.90746	5.81108	3.06739	5.94845	3.36092	4.34042	6.9998	9.51081	47.1629	32.454	Inf	2.83648	2.80403	2.8439	5.04724	2.52455	2.55854	2.73777	4.10892	4.98545	7.61048	11.1163	8.6989	8.17027	11.5071	4.69556	0.950478	1.25575	0.788956	5.45013	4.44567	6.72798	1.0155	1.3147	0.984741	1.04916	0.934799	1.30062	1.3157	4.27399	2.39581	3.25423	1.3207	2.91304	3.36431
42	'Made a plan to commit suicide ^'	2.50095	2.4175	3.93582	3.32165	3.91719	2.12339	3.49669	2.19992	3.19206	4.54017	8.20649	37.2156	Inf	32.454	2.43486	2.03751	1.98254	3.24082	1.97576	1.97487	1.98913	2.57645	3.20101	4.04081	5.75043	4.61571	4.41625	5.5883	3.20878	1.03718	1.30996	0.702101	4.15172	3.39293	5.69469	1.1989	1.30002	1.07092	1.10569	1.08667	1.25625	1.24098	2.43395	1.70142	2.27676	1.18138	2.10372	2.34283
43	'Has considered suicide ^'	2.02203	1.98174	3.18856	2.92874	3.58838	2.02841	3.00892	2.02887	3.03221	4.59839	10.387	Inf	37.2156	47.1629	2.69891	2.19334	1.93376	3.22508	2.04002	2.05928	1.97398	2.64888	3.10964	3.51563	4.59376	4.37185	3.67552	4.61986	3.02894	1.09952	1.33873	0.757566	4.54254	3.13097	5.06252	1.13883	1.17804	1.05218	1.07712	1.08734	1.13721	1.22848	2.20613	1.76219	2.11636	1.22052	2.13732	2.43768
44	'Has felt sad/hopeless *'	1.51411	1.45323	2.12717	3.43959	3.24953	1.89585	2.66608	1.80262	2.58246	3.99091	Inf	10.387	8.20649	9.51081	2.3628	2.04037	1.79817	2.3152	1.8208	1.82245	1.73147	1.94236	2.30706	2.24718	2.92382	2.93413	2.85611	3.01932	2.37201	1.18401	1.43627	0.832448	4.33527	2.68353	3.85727	0.999045	1.03042	0.97428	0.997404	1.02656	0.987966	1.23602	1.80292	1.6941	1.8527	1.1005	2.159	2.19015
45	'Ever had sex '	2.46011	4.07704	3.56169	2.0972	2.76154	3.15417	5.14739	3.13756	4.4401	7.84161	1.72041	1.80704	1.73659	2.82667	5.0091	4.49621	4.96637	4.82879	7.07475	7.06956	6.33141	7.81546	8.80323	15.4076	11.9524	9.17763	5.75189	12.6284	9.17849	1.18976	0.940367	1.10625	1.66678	2.51359	1.93015	0.813628	1.16185	0.995605	0.847359	1.12979	1.10783	1.17184	3.42149	2.66286	7.03823	1.70395	5.30132	6.119
46	'Forced to have sex '	2.04781	3.06252	3.73474	4.24899	4.57186	2.55301	4.33139	2.52442	6.55618	Inf	3.99091	4.59839	4.54017	6.9998	3.05769	2.528	2.37051	4.47093	2.91345	2.91741	2.65216	3.9563	4.43197	5.76241	8.9333	6.1726	5.92858	8.43305	4.53558	1.11528	1.29267	0.594137	3.75047	4.65718	5.43049	1.12834	1.44782	0.940427	1.00388	1.05922	1.27349	1.58073	4.00826	2.29072	3.24974	1.13402	3.61989	3.2867
47	'Physically injured by boyfriend/girlfriend*'	2.64512	3.73528	3.26799	3.44317	4.55173	2.93863	4.51653	2.65974	Inf	6.55618	2.58246	3.03221	3.19206	4.34042	2.49214	2.72658	2.55993	3.79542	2.53679	2.53804	2.47346	3.69255	3.41198	5.35028	6.71654	5.16241	5.61549	7.65018	3.52347	1.0739	1.09246	0.807572	2.54385	3.37957	3.78971	1.13782	1.3691	0.981973	1.00654	1.01607	1.39471	1.55081	4.12895	2.50379	3.37582	1.49371	2.80042	2.63797
48	'Been in fight at school^'	4.05921	5.82431	5.81431	3.9152	5.5188	Inf	14.4693	Inf	2.65974	2.52442	1.80262	2.02887	2.19992	3.36092	2.46451	2.44437	2.42951	5.74025	2.69958	2.73098	2.85379	5.95221	3.8322	7.06377	8.61291	6.65699	7.14217	8.67895	3.74625	0.648115	0.72278	1.26638	1.70623	2.48338	2.44974	0.916267	1.32756	0.973902	0.742143	0.858025	1.21524	0.936562	4.68567	2.36002	3.24904	1.66032	2.44948	2.8964
49	'Injured in a fight*'	6.60591	8.87725	9.66929	8.47101	10.1409	Inf	Inf	14.4693	4.51653	4.33139	2.66608	3.00892	3.49669	5.94845	4.10023	3.8185	3.84243	7.4807	3.3934	3.44388	3.66461	7.26265	6.76683	11.734	16.3385	11.5232	11.2573	17.8367	6.39572	0.777196	0.823547	0.965504	2.9622	4.09361	4.89657	0.962452	1.55652	0.907571	0.838835	0.763124	1.31489	1.10571	6.68655	3.43227	5.96203	1.37079	3.1672	3.66376
50	'Been in fight^'	5.19219	7.12117	6.05346	3.01656	5.27159	Inf	Inf	Inf	2.93863	2.55301	1.89585	2.02841	2.12339	3.06739	3.08603	2.94247	3.03714	5.00088	3.25167	3.27369	3.43691	5.70097	4.52862	6.72307	7.75723	6.57868	5.58793	6.91764	4.12825	0.796098	0.780198	1.20159	1.81564	2.15991	2.17255	0.822339	1.00733	0.99022	0.793301	0.940996	1.11738	0.976603	3.91335	2.61738	3.71661	1.60839	2.9486	3.52989
51	'Been threatened at school^'	5.69936	7.84922	8.77789	10.6407	Inf	5.27159	10.1409	5.5188	4.55173	4.57186	3.24953	3.58838	3.91719	5.81108	2.88339	2.86498	2.79951	5.31205	2.40175	2.46256	2.86906	5.40106	5.23596	8.92687	13.921	8.53917	9.09005	13.7346	4.66971	0.830329	0.91574	0.8288	3.04519	3.90669	4.51022	1.02662	1.51971	0.952132	0.848829	0.841036	1.19703	1.0781	5.54529	2.97487	4.58357	1.25812	2.84121	2.99291
52	'Felt unsafe at school*'	2.98845	4.68417	5.1836	Inf	10.6407	3.01656	8.47101	3.9152	3.44317	4.24899	3.43959	2.92874	3.32165	5.90746	1.944	2.14353	2.08419	3.96461	1.72412	1.78478	2.14016	3.88002	3.86655	6.2943	10.0796	6.14439	7.27562	10.0198	3.49951	0.823455	1.13597	0.919905	3.26359	3.96549	4.47065	1.0093	1.4079	0.951759	0.946832	0.873535	1.3824	1.30715	4.76872	2.56655	3.53515	1.26831	2.2408	2.44141
53	'Carried weapon at school'	Inf	18.1736	Inf	5.1836	8.77789	6.05346	9.66929	5.81431	3.26799	3.73474	2.12717	3.18856	3.93582	4.79849	5.29274	4.84123	4.86649	10.148	3.95273	4.01824	4.77496	10.2866	8.25744	15.2992	17.5659	14.4457	12.6449	17.9484	7.75812	0.869265	0.989026	0.959862	2.43437	3.38964	3.85454	1.19299	1.35215	1.00016	0.702898	0.740329	1.37333	1.04621	7.22026	3.59459	6.95984	1.53561	4.70353	5.47771
54	'Carried a gun*'	Inf	Inf	18.1736	4.68417	7.84922	7.12117	8.87725	5.82431	3.73528	3.06252	1.45323	1.98174	2.4175	3.50723	4.39654	4.74116	4.38147	8.19232	3.42158	3.46604	4.11125	8.79913	7.68773	15.3333	17.6613	12.4583	10.9087	17.6506	7.08451	0.749926	0.72707	1.21887	1.71165	2.9683	2.93368	0.892632	1.1393	0.901249	0.603067	0.713837	1.31228	0.819896	8.47589	3.90023	7.54751	1.55962	3.27856	4.77118
55	'Carried a weapon '	Inf	Inf	Inf	2.98845	5.69936	5.19219	6.60591	4.05921	2.64512	2.04781	1.51411	2.02203	2.50095	2.59591	3.26433	3.06737	3.10603	4.93562	2.69154	2.70618	3.09483	5.46874	4.79387	8.26522	10.4383	7.32231	6.27978	10.0089	4.76706	0.85509	0.941948	1.01357	1.58819	1.82304	2.17712	0.930346	1.08095	0.970628	0.699515	0.783189	1.18942	0.811006	5.30138	2.54464	4.13495	1.60719	3.03925	3.77344
[truncated: 7 more columns]

## Sheet:  2011 Normalized OR
Question #	Question	Carried a weapon	Carried a gun*	Carried weapon at school	Felt unsafe at school*	Been threatened at school^	Been in fight^	Injured in a fight*	Been in fight at school^	Physically injured by boyfriend/girlfriend*	Forced to have sex	Ever had sex	Has felt sad/hopeless *	Has considered suicide ^	Made a plan to commit suicide ^	Times attempted suicide *	Has ever smoked	Has smoked*	Smoked cigarettes at school*	Has ever smoked cigarettes daily	Used snuff*	Has used snuff at school*	Smoked cigars*	Days had at least 1 drink of alcohol	Drank alcohol*	Had 5+ alcoholic drinks*	Drank alcohol at school*	Does not wear seatbelt	Ridden with drunk driver *	Has driven while drinking*	Smoked marijuana	Age when first tried marijuana	Used marijuana*	Used marijuana at school*	Has ever used cocaine	Has used cocaine*	Has ever used heroin	Has ever used methamphetamines	Has ever used steroids	Has ever used injected drugs	Has ever used ecstasy	Offered drugs at school ^	Does not go to PE class+	Has not participated in sports^	Watches TV	Has fasted to lose weight *	Has taken pill to lose weight *	Has vomited to lose weight*	No fruit juice+
1	'Does not wear sunscreen'	0.105641	0.0622927	0.0399072	-0.235999	-0.247628	0.106714	-0.123896	0.152564	0	-0.39746	-0.440742	-0.291402	-0.338422	-0.177599	-0.166068	-0.147043	-0.131401	0.323458	0.0808742	0.0841751	0.0383867	0.23101	0.118206	0.110957	0.0171614	-0.248444	-0.0811672	0.0739893	-0.100489	-0.46255	-0.041688	-0.68574	-0.308156	-0.348806	-0.402331	-0.00806847	0.308885	0.227483	-0.127674	0.150585	0.264511	0.0417787	0.509758	-0.0758707	-0.0225987	0.509758	0.169259	0.0167346
2	'No milk+'	-0.530997	-0.515268	-0.163611	0.157647	-0.120295	-0.262937	-0.0838053	-0.323335	0.404242	0.431806	0.076922	0.0680904	0.082701	0.16705	-0.313625	-0.193295	-0.183067	0.1733	-0.0591134	-0.0625889	-0.0473189	-0.197072	-0.0984121	-0.0328758	0.0631759	0.197057	0.0472236	0.296297	-0.0792692	0.296687	0.474465	-0.822818	0.355843	0.300955	0.461399	0.942936	1.2498	0.499895	0.560507	0.832219	0.906876	1.2498	0.457481	-0.0241154	-0.252446	0.391898	-0.0756996	-0.188978
3	'No vegetables+'	-0.0788671	0.0629585	0.128554	0.13805	-0.0696564	-0.169005	0.0658257	-0.0478838	0.15084	0.0196651	-0.346588	-0.143627	0	0.0500764	-0.519792	-0.401723	-0.356939	0.0623597	-0.320342	-0.323991	-0.254789	0.134699	-0.0183159	0.292943	0.403473	0.248207	0.278752	0.41892	-0.167853	-0.175051	0.412525	-0.73232	-0.0393864	0.0415961	0.134711	1.06514	2.01235	1.77742	1.29637	2.02071	2.02071	0.806537	0.887095	-0.158693	-0.0536264	0.514291	-0.21791	-0.234418
4	'No carrots'	-0.264829	-0.398595	-0.346022	-0.107323	-0.162022	0	-0.302272	-0.133169	0.110733	0.170735	0.125556	0.20854	0.207647	-0.00953372	0.110816	-0.0313978	-0.19962	-0.146182	0.134555	0.133492	-0.0426372	-0.266081	-0.291815	-0.618818	-0.927001	-0.539029	-0.507547	-0.708031	-0.370058	0.452597	0.63162	0.158631	0.0838699	-0.0655865	-0.035371	1.16062	1.94315	1.883	1.45032	2.43757	2.43757	1.14874	0.119109	0.0690728	-0.255837	0.817225	0.10913	-0.00717558
5	'No potatoes+'	-0.279119	-0.493155	-0.27216	0.157634	0	-0.0976057	-0.0170863	-0.193777	0.245856	0.242044	0.232703	0.343638	0.3814	0.305687	0.0221102	-0.116723	-0.243507	-0.0741547	0.0172346	0.0226398	-0.113914	-0.171213	-0.187526	-0.367133	-0.308316	-0.167142	-0.216512	0.0115298	-0.326827	0.513025	0.91302	-0.17472	0.266828	0.283783	0.416271	1.34556	1.59335	1.44808	1.86195	1.59904	1.86195	1.02574	0.389987	0.0758672	-0.177343	0.687681	-0.00404493	-0.193094
6	'No green salad+'	0.000469456	-0.106524	0.0437067	-0.0278523	-0.0272873	0.0292992	-0.0964394	0.00532667	0.0172346	-0.0451329	0.00588675	0.116867	0.142331	0.0212948	-0.0729516	-0.24977	-0.331426	0.00810904	0.0286059	0.0231223	-0.0367703	-0.0889153	0	-0.324206	-0.41665	-0.31771	-0.330693	-0.26941	-0.253851	0.31164	0.658362	-0.0757742	-0.0657511	-0.540686	-0.189117	1.15178	1.95238	2.15002	1.2551	1.83874	2.15002	0.772155	0.245146	-0.125104	-0.246521	0.849863	0.0779138	-0.119845
7	'No fruit+'	-0.266228	-0.19038	0.0567247	0.115012	0.225269	-0.367993	0.259789	0.0302456	0.0747015	0.155348	-0.335305	-0.142147	0	0.016207	-0.720602	-0.729091	-0.59826	0.0748233	-0.423015	-0.416494	-0.417933	-0.0481341	-0.13038	0.105414	0.737832	0.377217	0.421432	0.66797	-0.172891	-0.0127505	0.625108	-1.00479	-0.0572364	-0.0345957	0.409438	1.50592	1.96294	1.53037	0.978367	1.47688	1.96294	1.10005	0.687905	-0.331446	-0.413983	0.509255	-0.295261	-0.337931
8	'No fruit juice+'	-0.127998	-0.187698	0.230748	-0.0104779	0.0140625	-0.30603	-0.0790492	-0.149997	0.162435	0.150362	-0.0252142	0.163714	0.237871	-0.00164794	-0.32246	-0.409882	-0.471613	-0.0249576	-0.238799	-0.226166	-0.322318	-0.0731352	0	0.204101	0.496269	0.341782	0.190644	0.456099	-0.0393553	0.451448	0.790953	-0.543411	0.303581	0.172509	0.51712	1.86061	1.86061	1.08446	1.08527	1.04904	1.37043	1.14788	0.839057	-0.297994	-0.19468	0.546997	-0.0793809	-0.136547
9	'Has vomited to lose weight*'	-0.605122	-0.174828	0.219017	0.432943	0.445659	-0.608151	0.564232	-0.434912	0.194548	0.713542	0.220041	0.612316	0.782078	1.02263	-0.241595	-0.266524	-0.186001	0.392245	-0.690574	-0.690942	-0.500108	0.137911	0.385393	0.969271	1.56638	1.14217	1.43972	1.71022	0.403102	-1.67974	-1.39562	-2.4142	2.085	2.54053	2.54053	-1.18658	-0.939571	-1.96014	-1.54772	-1.85065	-1.26371	-1.03736	0.46085	-0.232539	0.0877714	-1.55097	-0.0778793	-0.13945
10	'Has taken pill to lose weight *'	-0.780266	-0.0769735	0.11452	0.340889	0.319336	-0.535641	0.386765	-0.334303	0.110231	0.572847	-0.22248	0	0.115923	0.505792	-0.0443999	-0.0623891	-0.0448055	0.118011	-0.442295	-0.412951	-0.480955	0.0331105	0.517819	1.21299	1.35316	1.15509	1.4331	1.39086	0.45571	-1.47303	-1.52363	-2.06652	1.39376	2.62146	2.62146	-1.45026	-1.30267	-2.23078	-1.59928	-1.79994	-1.27589	-1.11687	0.288431	-0.396666	0.238619	-1.41651	0.100896	0.0232271
11	'Has fasted to lose weight *'	-0.444815	-0.336805	0.171352	0.594265	0.49434	-0.251714	0.454474	-0.341378	0.234817	0.794878	1.00393	1.0713	0.941516	1.3341	-0.0429919	-0.0810952	-0.0697412	0.454137	-0.378859	-0.360521	-0.262308	0.0262306	0.287602	0.526733	1.0151	0.7827	0.89728	1.06551	0.316864	-0.914855	-0.730989	-1.61555	2.70035	1.92818	2.70035	-0.784777	-0.790899	-1.22142	-1.08182	-1.11606	-0.82246	-0.52757	0.412089	-0.149132	0	-0.841448	0.0546177	0.205023
12	'Watches TV'	0.0700858	0.336188	-0.00845408	-0.0697975	-0.220258	0.315591	0	0.39136	-0.257691	-0.700487	-0.213922	-0.34991	-0.459603	-0.291337	0.4328	0.296496	0.180978	0.198168	0.258428	0.259844	0.233574	-0.015216	0.0175779	0.0700438	0.175748	-0.169691	0.038547	0.141997	-0.118767	-0.300943	-0.281519	0.505587	-0.452709	-0.36926	-0.636017	-0.468929	-0.575615	-0.0686065	-0.360527	0.121538	-0.352554	-0.54339	-0.830252	0.214841	0.417784	-0.0561921	0.11548	0.136359
13	'Has not participated in sports^'	-0.213867	-0.58742	-0.143506	0.0563339	-0.254577	-0.485674	-0.407663	-0.595959	0	0.242764	0.394744	0.293282	0.261936	0.200957	-0.206525	-0.157799	-0.195451	-0.0253303	0.0283368	0.037614	-0.0290274	-0.132151	0.16322	-0.276373	-0.314197	-0.0269015	-0.576418	-0.421498	0.0998257	0.927223	0.927223	-0.459752	0.253618	-0.00460419	0.204335	0.687203	0.876052	0.487297	0.548979	0.416294	0.614059	0.57566	0.263914	-0.12048	-0.397958	0.409626	0.26039	0.316077
14	'Does not go to PE class+'	-0.291222	-0.480551	-0.267502	-0.345608	-0.333616	-0.394353	-0.42902	-0.691048	0.0374943	0.0920396	0.178317	0.0715019	-0.012708	-0.138645	0.170082	0.058596	-0.000394118	-0.388616	0.0557078	0.0525105	-0.10524	-0.232599	0	-0.45644	-0.526057	-0.339148	-0.536053	-0.488623	0.0217843	0.98944	0.98944	-0.41696	0.131969	0.108213	-0.017568	0.409914	0.300411	0.202791	0.211201	0.299488	0.0886988	0.460098	-0.0460432	-0.0584856	0.0379935	0.0509805	0.238323	0.257287
15	'Offered drugs at school ^'	-0.126035	0.222066	0.691947	-0.452194	0.22406	-0.126334	0.071952	-0.13339	-0.185465	-0.163174	-0.527049	-0.290928	-0.309117	-0.267716	0.165347	0.00969027	0.0379889	1.02784	0.262175	0.259958	0.300319	1.66104	0.89728	1.39589	0.9715	0.876335	0.758367	1.00747	0.810934	-1.47625	-1.37181	-1.40749	-0.602314	-0.233861	-0.12783	-1.55849	-1.48827	-1.36884	-1.61037	-1.52861	-1.32758	-1.48517	-0.334113	-0.201514	0.112863	-1.1226	0.17347	0.14581
16	'Has ever used ecstasy'	-0.245319	0.326251	0.457289	-0.691266	-0.275086	-0.452887	0.17869	-0.59297	-0.68142	-0.31713	-1.25231	-0.899606	-0.816393	-0.267121	1.65873	0.942389	0.622589	0.517913	2.93255	2.95195	1.09094	0.956964	2.50152	2.71985	3.22552	3.05364	1.55068	2.62278	3.22552	-2.41126	-2.27101	-2.66783	-1.06936	-0.396098	-0.367776	-2.51394	-2.29278	-2.79575	-3.0617	-2.95621	-2.33715	-2.34891	0	-0.311483	0.51984	-2.02001	1.37731	0.829783
17	'Has ever used injected drugs'	0.0515097	0.869947	0.894086	0.0530817	0.508052	-0.481415	0.885083	-0.154176	-0.336203	-0.195642	-1.67747	-1.06385	-0.789286	0.252756	-0.983693	-0.488996	-0.497653	0.850417	0	0.0394905	-0.0509068	1.05715	2.22867	2.59612	4.88478	3.16507	2.70037	4.88478	1.8495	-3.69495	-3.56561	-3.18035	-1.09399	-0.234225	0.166067	-2.79176	-2.22519	-3.58458	-3.49662	-4.06747	-2.52366	-2.74662	0.63408	-0.994276	0.107684	-2.61881	-0.0182754	0.121904
18	'Has ever used steroids'	-0.319052	0.477639	0.690716	-0.106697	0.214521	-0.487453	0.523023	-0.133404	-0.480356	-0.40208	-1.45571	-1.09182	-0.826944	0.060617	0.189354	0.0321448	-0.279317	0.707094	0.30023	0.375656	-0.00216989	0.730525	1.20266	1.95978	2.9025	2.13954	3.0023	3.0023	1.07933	-3.44045	-3.4186	-2.98187	-0.960293	0.109946	0.197498	-2.75529	-2.1698	-3.34394	-3.42273	-3.56505	-2.36189	-2.69376	0.225699	-0.676205	0.0361039	-2.47203	0.121067	0
19	'Has ever used methamphetamines'	-0.289286	0.477448	0.690984	-0.542314	-0.0674888	-0.443787	0.36488	-0.426715	-0.79354	-0.535706	-1.60865	-1.03334	-0.955031	-0.0407521	0.297382	0.297147	0	0.539279	2.1133	2.14638	0.522128	0.770259	2.67791	2.78742	3.96359	3.96359	1.94772	3.27518	2.39047	-3.43536	-3.0609	-3.38192	-1.26669	-0.359883	-0.291875	-2.79597	-2.40584	-3.52277	-3.56518	-3.78835	-2.58426	-2.73575	0.237801	-0.913553	0.21485	-2.83113	0.693224	0.50735
20	'Has ever used heroin'	0.0331665	0.79187	0.784058	-0.017287	0.448539	-0.395106	0.679555	-0.244146	-0.602928	-0.191454	-1.80279	-1.15097	-0.826976	0.123953	-0.102852	-0.170936	-0.452456	0.704363	0.844775	0.891786	0.299397	0.979818	3.16925	3.0538	4.80583	3.77453	2.52162	4.80583	2.37329	-3.81133	-3.53726	-3.22555	-1.22335	-0.350873	-0.0567254	-2.83054	-2.23428	-3.81078	-3.89542	-4.36539	-2.61805	-3.05869	0.4953	-0.931393	0.350398	-2.75458	0	0.401425
21	'Has used cocaine*'	-0.359885	0.531656	0.52845	-0.752893	-0.248784	-0.657818	0.145689	-0.586499	-0.987323	-0.880265	-2.23882	-1.59316	-1.39229	-0.47895	0.446611	0.887053	0.525489	0.824176	1.38941	1.41508	1.17317	0.986543	2.99751	2.99751	2.99751	2.54206	1.52261	2.46088	1.81133	-3.79801	-3.55572	-3.38754	-1.76801	-0.547342	-0.710127	-3.179	-2.92299	-3.77462	-4.01052	-4.11349	-2.78487	-3.21103	0.205981	-0.500255	0.467056	-2.71708	0.552789	0.767148
22	'Has ever used cocaine '	-0.425084	0.256283	0.359421	-0.735225	-0.297819	-0.507203	0.0722058	-0.748101	-0.915663	-0.538326	-1.48022	-1.04953	-1.00775	-0.36855	1.40769	0.495962	0.509144	0.492624	2.07999	2.09766	0.762916	0.833897	3.83362	3.83362	3.83362	3.15322	1.48616	2.81409	2.31367	-2.6209	-2.39547	-2.71934	-1.28648	-0.521845	-0.57334	-2.66244	-2.43812	-2.72975	-3.11025	-3.06583	-2.37547	-2.5559	0	-0.419536	0.471569	-1.98917	1.35378	0.830056
23	'Used marijuana at school*'	-0.232509	0.453644	0.678984	-0.727651	-0.250473	-0.172508	0.17678	-0.110291	-0.7991	-0.699564	-1.7259	-1.27833	-1.31833	-0.644956	1.10576	0.987883	0.343807	1.55279	1.70976	1.70976	1.70976	1.70976	0.836455	1.70976	1.64675	1.24813	1.01658	1.64513	0.771666	-2.85095	-2.68828	-2.74958	-1.54529	-1.004	-0.818265	-2.73302	-2.35332	-2.81611	-3.09138	-3.03754	-2.2199	-2.65201	0.160886	-0.485475	0.404587	-1.8738	0.316699	0.359776
24	'Used marijuana*'	-0.186517	0.223199	0.439113	-0.718661	-0.295798	-0.0352658	0.0572816	-0.303498	-0.509846	-0.409211	-1.02438	-0.835267	-0.824241	-0.363373	1.82463	1.61453	1.35393	1.32287	2.76373	2.76373	2.76373	2.76373	1.63281	2.76373	1.83367	1.86734	1.15122	1.40441	1.77298	-1.85625	-1.71782	-1.63345	-0.96649	-0.650722	-0.588944	-2.11486	-1.85578	-1.89663	-2.16674	-1.94675	-1.74204	-1.63491	-0.0384795	0	1.19098	-1.19909	1.31728	1.59471
25	'Age when first tried marijuana'	-0.288945	0.0680889	0.281364	-0.889455	-0.425042	-0.0142815	0.0588334	-0.275785	-0.381484	-0.180513	-0.859324	-0.683058	-0.743444	-0.36988	1.95642	1.23103	1.45879	1.34516	3.72516	3.72516	3.72516	3.72516	3.05873	3.09682	2.51723	3.58277	1.62022	1.58599	3.72516	-1.60732	-1.56	-1.516	-0.973528	-0.491542	-0.688603	-1.92753	-1.76316	-1.74556	-1.93902	-1.67945	-1.72007	-1.55901	-0.408489	-0.0880588	1.474	-1.06212	1.93394	2.04748
26	'Smoked marijuana'	-0.298985	0.0472448	0.255432	-0.941561	-0.463334	-0.0262367	0.0353148	-0.294684	-0.384414	-0.18469	-0.862843	-0.698833	-0.745011	-0.39139	1.94978	1.21911	1.45148	1.34028	3.70355	3.70355	3.70355	3.70355	3.03885	3.06893	2.468	3.54747	1.54258	1.54428	3.70355	-1.60634	-1.57149	-1.51964	-0.994083	-0.523103	-0.690452	-1.94238	-1.7719	-1.74229	-1.94664	-1.6806	-1.71864	-1.55775	-0.452219	-0.104459	1.45625	-1.06764	1.93456	2.03794
27	'Has driven while drinking*'	-0.593013	0.275119	0.158173	-0.819111	-0.44441	-0.746896	-0.0650783	-0.940869	-0.885645	-0.940556	-1.75125	-1.5593	-1.4539	-0.938566	1.79983	1.79983	1.79983	0.727217	0.542782	0.558319	0.366473	0.447421	0.516961	1.23311	1.06016	0.735552	0.364988	0.738498	0.377375	-2.53752	-2.91125	-2.27374	-1.52869	-0.755653	-0.825571	-2.81173	-2.67633	-2.93088	-3.05468	-2.98446	-2.36539	-2.66455	0.0935331	0.792795	1.79983	-2.08458	0.465939	0.479847
28	'Ridden with drunk driver *'	-0.275497	0.3406	0.222866	-0.263129	-0.0501313	-0.234838	0.156203	-0.38416	-0.298848	-0.427159	-0.862441	-0.805588	-0.856218	-0.362444	0.600715	0.924818	0.866392	0.615707	0	0.0141835	0.193417	0.575283	0.643779	1.28372	0.796295	0.625073	0.670603	0.654461	0.563976	-1.61607	-1.61585	-1.45876	-0.659897	-0.373015	-0.127958	-1.89712	-1.57587	-1.79154	-1.78355	-1.64163	-1.45253	-1.41829	0.382377	1.81072	1.81072	-1.11993	0.110587	0.355776
29	'Does not wear seatbelt'	0.403391	1.08039	0.849075	0.250627	0.468288	-0.0345721	0.738286	0.225278	0.0427998	0	-1.15264	-0.861456	-0.719674	0.0926069	-1.4906	-0.594118	-0.368719	0.752028	-0.727777	-0.686263	-0.225079	0.841626	0.683298	1.60994	1.84297	1.39641	1.19249	1.9028	0.495442	-1.98365	-1.61148	-2.88387	-0.478693	-0.0679354	0.185414	-1.14008	-0.93654	-1.80131	-1.84944	-1.97161	-0.786761	-1.31671	1.9028	0.00235992	0.731439	-0.914317	-0.713201	-0.098757
30	'Drank alcohol at school*'	-0.189849	0.541191	0.85004	-0.505901	-0.0838108	-0.1709	0.410092	0.0280331	-0.56882	-0.332505	-1.28194	-0.803746	-0.796721	-0.157587	1.74343	1.74343	1.58865	1.74343	0.574622	0.577282	0.646162	1.74343	0.685817	1.73803	1.56193	1.20778	1.18378	1.62903	0.52325	-2.81633	-2.39082	-2.34556	-0.926749	-0.728459	-0.373296	-2.4942	-2.03973	-2.52845	-2.80369	-2.727	-2.1016	-2.091	0.261924	-0.254415	0.875019	-1.59072	0.0764786	0.138346
31	'Had 5+ alcoholic drinks*'	-0.30695	0.189395	0.340862	-0.882535	-0.456847	-0.339308	0	-0.661357	-0.585916	-0.696826	-1.09549	-0.990614	-0.954673	-0.434148	2.49869	2.49869	2.49869	2.13971	1.23688	1.24197	1.22829	1.0855	1.2534	1.99041	0.956171	1.21956	0.74843	0.832022	1.17899	-1.87704	-2.00988	-1.81169	-0.899568	-0.340216	-0.400481	-2.3898	-2.16175	-2.31693	-2.42198	-2.22938	-1.96984	-1.89631	-0.307763	0.547331	2.49869	-1.49452	0.895319	1.28876
32	'Drank alcohol*'	-0.316003	0.312236	0.342368	-0.833014	-0.41448	-0.375979	0	-0.643541	-0.48591	-0.595007	-0.904172	-0.799878	-0.906199	-0.445502	2.36099	2.36099	2.36099	2.36099	1.01352	1.02323	1.4979	1.73859	1.24923	2.36099	1.24671	1.52573	1.06891	0.849694	1.5078	-1.80904	-1.96322	-1.68716	-0.901906	-0.348784	-0.471989	-2.31905	-2.28356	-2.22625	-2.28618	-2.05214	-2.00561	-1.89752	-0.524147	0.614772	2.36099	-1.50115	0.743143	1.62777
33	'Days had at least 1 drink of alcohol'	-0.328921	0.100665	0.368309	-1.07668	-0.507938	-0.409954	0	-0.734407	-0.718318	-0.423262	-0.795205	-0.603328	-0.751864	-0.531605	2.27078	2.27078	2.27078	2.27078	1.6415	1.64592	1.6053	1.75377	2.05826	1.81784	1.21209	1.42326	1.12342	0.252298	2.12144	-1.80025	-2.11464	-1.65355	-0.966503	-0.433495	-0.54976	-2.33433	-2.37778	-2.15214	-2.25005	-2.01263	-2.22638	-2.12055	-1.52333	0.187969	2.27078	-1.62287	1.26985	1.7608
34	'Smoked cigars*'	0	0.43266	0.594879	-0.688168	-0.256545	-0.324521	0.0639124	-0.531054	-0.714625	-0.791204	-1.27114	-1.10878	-1.06581	-0.45169	1.84279	1.28392	0.897882	0.57499	1.43834	1.44611	1.13527	0.967594	0.904511	1.5465	1.40605	1.05825	0.840075	1.40782	0.829622	-2.1717	-2.19986	-1.88082	-1.0862	-0.596347	-0.683935	-2.39331	-1.99791	-2.26166	-2.74421	-2.36302	-2.01372	-2.13366	-0.157941	-0.225656	0.735268	-1.66409	1.9903	2.52412
35	'Has used snuff at school*'	0.595455	0.712882	0.967526	-0.520871	-0.211593	-0.306696	0.159785	-0.390083	-1.04686	-0.936001	-2.20016	-1.71541	-1.51781	-0.779258	0.720558	0.546952	0.684696	0.625947	0	0.00725333	-0.238908	0.37118	0.773111	1.40996	1.82664	1.34688	1.26709	1.92878	0.442838	-3.10939	-3.42302	-2.21307	-1.63718	-0.546308	-0.763115	-2.6497	-2.34963	-3.03791	-3.55527	-3.18531	-2.61158	-2.87937	0.214417	-0.614822	0.616228	-2.01044	0.798589	1.13018
36	'Used snuff*'	0.568387	0.808244	0.826909	-0.552416	-0.11072	-0.335513	0.0575529	-0.41514	-0.82612	-0.786214	-1.89223	-1.43475	-1.22839	-0.73311	0.789644	0.65182	0.678872	0.44402	0.12802	0.13724	0	0.319281	0.807816	1.45957	1.92966	1.42667	1.38296	1.86801	0.572311	-2.58878	-2.95584	-1.86149	-1.31166	-0.349034	-0.51404	-2.28724	-2.01213	-2.59454	-3.19705	-2.64863	-2.18819	-2.6254	0.201574	-0.397838	0.703244	-1.79982	1.06962	1.20904
37	'Has ever smoked cigarettes daily'	-0.183244	0.0645135	0.258097	-0.652921	-0.312688	-0.346086	0	-0.723925	-0.59395	-0.158623	-0.877781	-0.650829	-0.671692	-0.150899	1.71248	0.823823	0.765498	0.351694	1.97425	1.95763	0.835348	0.583753	1.33325	1.30697	1.58239	1.49104	0.66047	1.43514	1.29705	-1.79233	-1.26212	-2.26304	-0.751191	-0.525314	-0.367949	-1.92914	-1.71072	-2.21641	-2.40105	-2.16509	-1.84969	-1.94853	0.155687	-0.313713	0.540919	-1.35029	3.33402	3.33402
38	'Smoked cigarettes at school*'	-0.208659	0.374168	0.639632	-0.655452	-0.415456	-0.207229	0	-0.434559	-0.925875	-0.663695	-1.51231	-1.2057	-1.17328	-0.503087	1.42779	1.17366	0.627369	0.771219	1.73698	1.75626	1.04847	1.49972	0.879071	1.4139	1.13934	1.07945	0.613328	1.19712	0.741103	-2.64583	-2.41406	-2.98672	-1.37647	-1.07502	-0.621862	-2.75838	-2.4113	-2.85233	-3.35623	-2.91798	-2.33201	-2.45341	0.0386332	-0.360882	0.432712	-2.11152	2.14832	2.14832
39	'Has smoked*'	0	0.338464	0.53769	-0.628168	-0.334333	-0.0962607	-0.0425551	-0.381621	-0.516453	-0.199243	-0.784854	-0.630376	-0.687627	-0.16557	1.88063	1.64489	1.3149	0.715545	1.84948	1.8568	1.49521	1.12761	1.60045	2.2582	1.83619	1.75305	1.05388	1.47772	1.41232	-1.59322	-1.47222	-1.83017	-0.598665	-0.246045	-0.327791	-2.02859	-1.87528	-2.07921	-2.34543	-2.0108	-1.82118	-1.87608	-0.0116628	0.0628526	1.20485	-1.32025	3.5181	3.5181
40	'Has ever smoked'	-0.129832	-0.0204846	0.500198	-0.569534	-0.227038	-0.173517	-0.070336	-0.441068	-0.247903	0.1224	-0.623185	-0.63774	-0.660602	-0.191021	1.57201	0.942602	1.10379	0.836013	1.92843	1.92559	1.40011	1.26687	2.3065	2.22618	1.6171	2.12126	1.35729	1.51987	2.14219	-1.42985	-1.34557	-1.66871	-0.566734	0.0139605	-0.083885	-1.78909	-1.65028	-1.69911	-1.97404	-1.71215	-1.62234	-1.58046	-0.44377	0	1.37328	-0.985386	2.42883	2.42883
41	'Times attempted suicide *'	-0.374073	0.0600218	0.512268	0.812225	0.788494	-0.133299	0.822201	-0.0014534	0.367524	1.057	1.49926	3.80927	3.27001	3.80927	-0.246212	-0.262809	-0.242439	0.585182	-0.414283	-0.39499	-0.297308	0.288448	0.567413	1.17768	1.72429	1.37052	1.28007	1.77414	0.480986	-1.82359	-1.42177	-2.0923	0.695979	0.402091	0.999861	-1.72812	-1.35557	-1.7725	-1.68108	-1.84758	-1.37111	-1.35448	0.345271	-0.489797	-0.0479956	-1.34901	-0.207787	0
42	'Made a plan to commit suicide ^'	0.0489605	0	0.703146	0.458384	0.696299	-0.187147	0.53247	-0.136064	0.400971	0.909227	1.76325	3.94432	3.94432	3.74681	0.010323	-0.246712	-0.286171	0.422841	-0.291111	-0.291761	-0.281383	0.0918638	0.405009	0.741128	1.25015	0.933035	0.869305	1.20889	0.408507	-1.22086	-0.883996	-1.78377	0.780191	0.489015	1.2361	-1.01181	-0.894987	-1.17467	-1.12857	-1.15361	-0.944398	-0.962036	0.00978379	-0.506778	-0.0865369	-1.03304	-0.200574	-0.045263
43	'Has considered suicide ^'	-0.125715	-0.154756	0.531384	0.408762	0.701811	-0.121168	0.447727	-0.120846	0.458852	1.05961	2.23518	4.41806	4.07631	4.41806	0.290858	-0.00839289	-0.190114	0.547814	-0.112935	-0.0993764	-0.16041	0.263864	0.495227	0.672263	1.05816	0.986723	0.736429	1.06633	0.457292	-1.00465	-0.720651	-1.54208	1.04198	0.50509	1.19834	-0.95397	-0.905136	-1.06813	-1.03434	-1.02072	-0.956026	-0.844648	0	-0.324149	-0.059937	-0.85402	-0.0457139	0.143986
44	'Has felt sad/hopeless *'	-0.359343	-0.41855	0.131122	0.824423	0.74242	-0.0349676	0.45691	-0.107717	0.410934	1.03891	2.41889	2.41889	2.07895	2.29176	0.282688	0.071021	-0.111281	0.253324	-0.0932375	-0.0919354	-0.165812	0	0.248245	0.210303	0.590044	0.595122	0.556239	0.636409	0.288296	-0.714126	-0.435482	-1.22238	1.15831	0.466318	0.989769	-0.959191	-0.914586	-0.995404	-0.961563	-0.919995	-0.97528	-0.652109	-0.107479	-0.197295	-0.0681852	-0.819653	0.152549	0.173216
45	'Ever had sex '	-0.7288	0	-0.194962	-0.959059	-0.562052	-0.370263	0.336318	-0.377882	0.123069	0.943626	-1.24477	-1.1739	-1.23127	-0.528418	0.297028	0.141186	0.284667	0.244137	0.795155	0.794098	0.635003	0.938807	1.11051	1.91805	1.5517	1.1706	0.496512	1.63108	1.17073	-1.77685	-2.11623	-1.88185	-1.29046	-0.697773	-1.07881	-2.32508	-1.8111	-2.03388	-2.26648	-1.85147	-1.87978	-1.79874	-0.252899	-0.61455	0.787689	-1.25864	0.378829	0.585773
46	'Forced to have sex '	-0.697924	-0.117287	0.169003	0.355115	0.460778	-0.379806	0.382824	-0.396054	0.980851	1.42719	0.264714	0.469126	0.450741	1.07531	-0.119561	-0.394006	-0.48681	0.428571	-0.189276	-0.187316	-0.324839	0.252148	0.415943	0.794668	1.42719	0.893874	0.835682	1.34405	0.449283	-1.57459	-1.36165	-2.48314	0.175067	0.487453	0.709078	-1.55781	-1.19812	-1.82062	-1.72641	-1.64901	-1.38322	-1.07142	0.270972	-0.536204	-0.0316782	-1.55056	0.123942	-0.0153651
47	'Physically injured by boyfriend/girlfriend*'	-0.102678	0.395202	0.202391	0.277725	0.680401	0.049131	0.6692	-0.0947273	1.42948	1.20684	-0.137267	0.094358	0.168475	0.611822	-0.188626	-0.0589186	-0.149909	0.418247	-0.16301	-0.162296	-0.199483	0.378602	0.264597	0.913601	1.24171	0.862031	0.983397	1.42948	0.310985	-1.40315	-1.37843	-1.81435	-0.159002	0.250828	0.416075	-1.31974	-1.05278	-1.53226	-1.49661	-1.48302	-1.02605	-0.87299	0.539762	-0.181903	0.249224	-0.927112	-0.0203703	-0.106584
48	'Been in fight at school^'	0.571781	1.09267	1.09019	0.519671	1.01494	2.40551	2.40551	2.40551	-0.03813	-0.113465	-0.59932	-0.428743	-0.311962	0.299442	-0.148118	-0.159952	-0.168753	1.0717	-0.0166816	0	0.063462	1.12401	0.488757	1.37102	1.65708	1.28545	1.38695	1.6681	0.456032	-2.07509	-1.91779	-1.1087	-0.6786	-0.137109	-0.156788	-1.57558	-1.04064	-1.48757	-1.87965	-1.67032	-1.16818	-1.54397	0.778838	-0.210617	0.250597	-0.717951	-0.156938	0.0848445
49	'Injured in a fight*'	0.608929	1.03528	1.15858	0.967705	1.22728	2.04195	2.04195	1.74009	0.0603849	0	-0.700106	-0.525582	-0.308841	0.457684	-0.0791235	-0.181824	-0.172808	0.788344	-0.352096	-0.330794	-0.241171	0.745667	0.643651	1.4378	1.91537	1.41164	1.37796	2.04195	0.562279	-2.47848	-2.39491	-2.16548	-0.54816	-0.0814537	0.176944	-2.17004	-1.47651	-2.25475	-2.36837	-2.50484	-1.71988	-1.96985	0.626433	-0.335666	0.460975	-1.65982	-0.451619	-0.241502
50	'Been in fight^'	0.719081	1.17485	0.9405	-0.0643583	0.740977	1.29828	1.29828	1.29828	-0.102116	-0.305062	-0.734416	-0.636909	-0.57089	-0.0402477	-0.0315097	-0.100234	-0.0545487	0.66492	0.043921	0.0536592	0.12385	0.853947	0.521811	1.09186	1.29828	1.06054	0.825053	1.13302	0.388271	-1.98624	-2.01535	-1.39232	-0.79678	-0.546291	-0.537871	-1.93945	-1.64672	-1.67144	-1.99132	-1.745	-1.49714	-1.69142	0.311143	-0.26914	0.236725	-0.971645	-0.0972317	0.162361
51	'Been threatened at school^'	0.544853	1.0066	1.16793	1.44558	1.83324	0.432292	1.37616	0.49841	0.220468	0.226836	-0.265714	-0.122615	0.00387164	0.57286	-0.438178	-0.447421	-0.480772	0.443324	-0.701862	-0.665787	-0.445367	0.467298	0.422509	1.19221	1.83324	1.12815	1.21834	1.8138	0.257386	-2.23419	-2.09294	-2.23685	-0.359412	0	0.207253	-1.92805	-1.36215	-2.03671	-2.2024	-2.21571	-1.70648	-1.85746	0.505318	-0.393118	0.230527	-1.63467	-0.459438	-0.384397
52	'Felt unsafe at school*'	-0.109764	0.538631	0.684789	1.72236	1.72236	-0.0962613	1.39337	0.279924	0.0945751	0.397956	0.0930718	-0.138882	0.0427384	0.873373	-0.730138	-0.589172	-0.629678	0.298016	-0.903306	-0.853417	-0.591448	0.266902	0.261885	0.964882	1.6442	0.930107	1.17391	1.63561	0.117988	-1.9694	-1.50524	-1.80961	0.0172953	0.298336	0.47132	-1.67581	-1.19562	-1.76049	-1.76798	-1.88423	-1.22199	-1.30273	0.564439	-0.329334	0.132607	-1.34626	-0.525152	-0.401449
53	'Carried weapon at school'	1.9084	1.9084	1.9084	0.09858	0.8585	0.322388	0.998037	0.264235	-0.566968	-0.374366	-1.18644	-0.602469	-0.298709	-0.0127932	0.128641	0	0.00750883	1.06775	-0.292523	-0.268808	-0.0198835	1.08733	0.770322	1.66001	1.85933	1.5772	1.38511	1.89041	0.680334	-2.4775	-2.29129	-2.33447	-0.991827	-0.514243	-0.328816	-2.02079	-1.84012	-2.27515	-2.78399	-2.70913	-1.8177	-2.2102	0.576678	-0.429548	0.523682	-1.65656	-0.0416286	0.178199
54	'Carried a gun*'	2.05236	2.05236	2.05236	0.0963799	0.841134	0.700699	1.0187	0.410673	-0.2302	-0.516697	-1.59215	-1.14465	-0.857897	-0.321082	0.00495502	0.113826	0	0.902857	-0.356752	-0.338125	-0.0918393	1.00595	0.811142	1.80718	2.0111	1.50762	1.31599	2.01023	0.693254	-2.5466	-2.59125	-1.84587	-1.35603	-0.561778	-0.578703	-2.29528	-1.94326	-2.28142	-2.86102	-2.61775	-1.73934	-2.4179	0.951949	-0.167856	0.784587	-1.49022	-0.418354	0.122931
55	'Carried a weapon '	1.76681	1.76681	1.76681	-0.037603	0.893797	0.759339	1.10676	0.404195	-0.213667	-0.582922	-1.01853	-0.601198	-0.294524	-0.240764	0.0897822	0	0.0180676	0.686229	-0.188569	-0.180746	0.0128573	0.834205	0.644188	1.43005	1.76681	1.2553	1.03371	1.7062	0.636097	-1.84285	-1.70328	-1.59756	-0.949623	-0.750658	-0.494584	-1.72116	-1.5047	-1.66001	-2.13258	-1.96957	-1.36675	-1.91922	0.789365	-0.269541	0.430867	-0.932461	-0.0132886	0.29888
[truncated: 7 more columns]

## Sheet: 2009 Raw OR
Question #	Questions	Carried a weapon	Carried a gun*	Carried weapon at school	Felt unsafe at school*	Been threatened at school^	Been in fight^	Injured in a fight*	Been in fight at school^	Physically injured by boyfriend/girlfriend*	Forced to have sex	Has felt sad/hopeless *	Has considered suicide ^	Made a plan to commit suicide ^	Times attempted suicide *	Days had at least 1 drink of alcohol	Drank alcohol*	Had 5+ alcoholic drinks*	Drank alcohol at school*	Smoked marijuana	Age when first tried marijuana	Used marijuana*	Used marijuana at school*	Has ever used cocaine	Has used cocaine*	Has ever used heroin	Has ever used methamphetamines	Has ever used steroids	Has ever used injected drugs	Has ever used ecstasy	Does not go to PE class+	Has not participated in sports^	Watches TV	Has fasted to lose weight *	Has taken pill to lose weight *	Has vomited to lose weight*	No fruit juice+	No fruit+	No green salad+	No potatoes+	No carrots	No vegetables+	No milk+	Does not wear seatbelt	Ridden with drunk driver *	Has driven while drinking*	Does not wear sunscreen	Has ever smoked	Has smoked*
1	'Does not wear sunscreen'	1.60678	1.61023	1.66526	1.22485	1.27258	1.76596	1.40024	1.72764	1.58029	1.18091	1.13721	1.16472	1.14915	1.30166	1.31311	1.36671	1.33038	1.74948	1.72112	1.71003	1.65432	1.71531	1.36237	1.30436	1.21762	1.30454	1.20208	1.32072	1.31305	1.22563	1.39923	0.953295	1.25662	1.19923	1.06819	1.39271	2.11458	1.77849	1.48131	1.79097	2.02616	1.55833	2.73026	1.39492	1.41855	Inf	1.66093	1.47323
2	'No milk+'	0.902817	1.09382	1.19521	1.28416	1.15006	0.978007	1.21713	1.01594	1.46497	1.74748	1.23238	1.16569	1.11788	1.2887	1.03179	1.04984	0.983516	1.22218	1.13596	1.13497	1.10474	1.04546	1.0272	1.25645	1.37746	1.14028	1.12196	1.59716	1.07425	1.43488	1.56013	0.66633	1.44205	1.47555	1.78463	2.05201	2.66335	1.69522	1.88311	2.02101	2.20047	Inf	1.92233	1.15198	0.927929	1.55833	1.11014	0.991952
3	'No vegetables+'	1.09776	1.47329	1.44233	1.41204	1.32295	1.16963	1.2613	1.22252	1.32745	1.38646	1.05989	1.07828	1.15578	1.44013	0.951173	0.964928	0.960591	1.30203	1.14577	1.14441	1.21703	1.54495	1.2937	1.60572	2.04945	1.34393	1.84053	2.2004	1.12502	1.12825	1.59368	0.74757	1.35629	1.22552	1.37952	2.625	5.48675	4.33927	3.07842	5.10176	Inf	2.20047	2.81161	1.10951	1.14168	2.02616	1.13068	1.00214
4	'No carrots'	0.873752	0.871034	0.937008	0.917046	0.84934	0.998659	0.809982	1.07194	1.11991	1.03358	1.07649	0.992323	1.00409	1.01847	1.0802	0.964733	0.915413	0.947164	1.13349	1.12675	1.08627	0.838354	0.862047	0.748024	0.713995	0.818194	0.798749	0.766619	0.805919	1.22222	1.39563	1.07247	0.90052	0.85466	0.85111	2.06671	3.6543	3.75392	2.55307	Inf	5.10176	2.02101	1.25665	1.04593	0.889193	1.79097	1.1349	0.974369
5	'No potatoes+'	0.748273	0.798452	0.858691	0.938729	0.898689	0.900594	0.864069	0.941059	1.11322	1.01675	1.11318	1.05918	1.14539	1.09069	0.876737	0.822213	0.773182	0.962579	0.958217	0.951241	0.922216	0.874554	0.968132	0.928597	0.958204	0.913604	0.879056	1.00472	0.899199	1.22159	1.45693	0.77606	1.02219	0.985362	1.22132	1.89332	2.58411	2.25181	Inf	2.55307	3.07842	1.88311	1.31063	0.907674	0.848286	1.48131	0.945912	0.825465
6	'No green salad+'	1.05312	0.982819	1.09118	0.89665	0.967504	1.13112	0.921304	1.17447	1.0997	1.04951	1.01282	1.03812	1.07127	1.08277	0.889778	0.785168	0.746665	0.947082	1.01438	1.00547	1.02724	1.03254	1.0041	1.03999	1.11633	0.987697	0.857948	1.23901	0.934196	1.17463	1.51791	0.962298	0.801946	0.793392	0.824996	2.16898	4.03453	Inf	2.25181	3.75392	4.33927	1.69522	1.89043	0.928039	0.78462	1.77849	1.0258	0.85848
7	'No fruit+'	1.17159	1.48451	1.67672	1.19924	1.49221	1.08243	1.3545	1.39947	1.33645	1.4164	1.18426	1.4385	1.4529	1.66971	0.88614	0.857968	0.893897	1.33409	1.12801	1.12262	1.16581	1.39071	1.24971	1.82271	2.34065	1.65788	1.83336	2.56011	1.27566	1.44363	2.08546	0.582423	1.21437	1.44239	1.91912	4.25234	Inf	4.03453	2.58411	3.6543	5.48675	2.66335	3.24833	0.931373	1.05318	2.11458	1.14421	1.13353
8	'No fruit juice+'	0.919004	0.939655	1.19	1.06352	1.16938	0.773805	0.96445	0.907471	1.11051	1.26108	1.06134	1.15205	1.23357	1.21655	0.780764	0.762458	0.821916	0.89506	0.843201	0.843793	0.857828	1.0081	1.07282	1.23282	1.56105	1.18891	1.18085	1.77842	0.857907	1.41317	1.67859	0.668046	1.20552	1.40491	1.67731	Inf	4.25234	2.16898	1.89332	2.06671	2.625	2.05201	2.34148	0.922449	0.870594	1.39271	1.04072	0.994232
9	'Has vomited to lose weight*'	2.14867	3.47837	3.58553	3.68788	3.92038	2.28858	5.15128	2.61391	3.43268	5.66448	3.85883	4.80697	5.11508	7.96227	3.1768	3.4616	3.06104	4.81439	2.75146	2.84946	2.90683	4.92219	5.51018	8.3854	13.1723	7.55668	7.83276	11.3122	5.90002	1.07645	1.01785	0.64046	15.8112	18.3833	Inf	1.67731	1.91912	0.824996	1.22132	0.85111	1.37952	1.78463	4.76915	2.37835	3.34313	1.06819	3.34753	3.36537
10	'Has taken pill to lose weight *'	2.19638	2.84887	2.98673	3.34315	3.04574	1.99758	3.95559	2.23891	2.72004	3.78652	2.69756	2.94896	3.13445	4.68923	3.51053	3.58056	3.07497	3.41159	2.69563	2.73722	2.60161	3.36968	4.40634	5.33078	7.80457	5.83024	5.7802	8.52003	4.36319	1.09195	1.12262	0.71513	9.33022	Inf	18.3833	1.40491	1.44239	0.793392	0.985362	0.85466	1.22552	1.47555	3.91744	2.61119	3.46174	1.19923	3.31871	3.40038
11	'Has fasted to lose weight *'	1.61225	1.72217	1.97893	3.27703	2.59846	1.76795	2.68069	1.76667	2.27246	3.41504	3.66285	3.86234	4.0205	5.82891	1.99975	2.19093	2.13931	2.63376	1.88455	1.90469	1.96812	2.74601	2.71335	3.36063	4.34033	3.63498	3.22158	4.55944	2.86942	1.03266	1.19914	0.840072	Inf	9.33022	15.8112	1.20552	1.21437	0.801946	1.02219	0.90052	1.35629	1.44205	2.87064	1.8459	2.08556	1.25662	2.34457	2.52399
12	'Watches TV'	0.972353	0.996329	0.915379	0.84256	0.849461	1.27354	0.990236	1.25752	0.838225	0.664423	0.846359	0.827417	0.790248	0.883898	1.47235	1.31465	1.25353	1.12735	1.18293	1.17372	1.13428	1.20629	0.970647	1.26502	1.06755	1.03481	1.18007	0.813664	0.930568	0.724147	0.699776	Inf	0.840072	0.71513	0.64046	0.668046	0.582423	0.962298	0.77606	1.07247	0.74757	0.66633	0.627903	1.27912	1.23412	0.953295	1.0829	1.0368
13	'Has not participated in sports^'	0.91804	0.708548	0.939822	1.04345	0.847808	0.817691	0.802892	0.879174	1.00211	1.15931	1.37473	1.32357	1.36152	1.27357	0.873444	0.879629	0.829126	0.96781	1.05884	1.05951	1.08715	1.00294	1.33137	1.16448	0.940994	1.05439	0.795285	0.906821	1.10746	1.90488	Inf	0.699776	1.19914	1.12262	1.01785	1.67859	2.08546	1.51791	1.45693	1.39563	1.59368	1.56013	1.54784	0.908543	0.762475	1.39923	1.19749	1.25822
14	'Does not go to PE class+'	0.948202	0.857964	1.06334	0.849017	0.881488	0.772862	0.753031	0.741774	1.12296	1.09642	1.2327	1.18515	1.14583	1.08238	1.15683	1.04042	0.965701	0.953337	1.06886	1.06762	0.974469	0.820176	1.00188	0.859839	0.940788	0.96625	0.773594	0.887073	1.10571	Inf	1.90488	0.724147	1.03266	1.09195	1.07645	1.41317	1.44363	1.17463	1.22159	1.22222	1.12825	1.43488	1.12265	0.982899	1.06859	1.22563	1.11576	1.13182
15	'Offered drugs at school ^'	2.82331	3.07876	3.72346	2.24839	3.84959	2.75214	3.20421	2.89088	2.5119	2.51716	2.00168	2.25357	2.51453	2.63364	3.35146	2.63739	2.73212	5.70471	3.57402	3.56854	3.85014	10.3034	5.29426	6.51546	7.2653	6.38949	4.48507	7.4299	5.21191	1.03252	1.02141	1.09565	2.02913	2.42721	2.93457	0.899871	1.04662	1.04612	1.01467	0.984369	1.06577	1.07668	2.12897	2.27223	3.12361	1.37296	2.87265	2.99464
16	'Has ever used ecstasy'	5.23677	7.07159	7.43274	3.76115	5.7112	4.91137	8.51669	4.54959	3.90826	5.55328	2.33941	3.18704	3.5611	5.98245	46.0503	12.7473	9.4067	10.09	50.2091	50.7351	14.1393	15.9395	34.0384	42.8254	80.5504	43.6028	19.4127	52.8751	Inf	1.10571	1.10746	0.930568	2.86942	4.36319	5.90002	0.857907	1.27566	0.934196	0.899199	0.805919	1.12502	1.07425	5.61224	4.48914	8.02441	1.31305	16.8682	11.7515
17	'Has ever used injected drugs'	12.3106	17.8776	16.7371	8.7221	13.3765	10.3165	18.045	8.05521	7.2912	12.3131	3.4056	5.05595	6.2631	14.6038	14.5942	11.661	9.17232	20.6711	21.3204	21.5428	13.2808	27.733	75.4415	84.2299	247.163	94.0814	60.0969	Inf	52.8751	0.887073	0.906821	0.813664	4.55944	8.52003	11.3122	1.77842	2.56011	1.23901	1.00472	0.766619	2.2004	1.59716	14.3869	6.16203	13.9039	1.32072	14.1773	14.1567
18	'Has ever used steroids'	7.39291	11.3093	10.4148	6.41007	7.87908	5.89109	11.4155	6.0265	4.7136	6.34751	2.32408	3.3929	4.18086	7.91184	12.0549	7.87574	6.44649	11.7053	8.43832	8.62284	6.89178	13.7248	17.1825	29.1914	54.4002	32.482	Inf	60.0969	19.4127	0.773594	0.795285	1.18007	3.22158	5.7802	7.83276	1.18085	1.83336	0.857948	0.879056	0.798749	1.84053	1.12196	9.81178	4.98207	8.36428	1.20208	7.56602	7.21193
19	'Has ever used methamphetamines'	6.68499	9.36421	10.0286	5.55581	7.42295	5.82328	9.97026	5.74475	4.61937	7.31792	2.90113	3.88678	4.35297	7.69368	20.2587	8.8668	8.11307	11.9127	33.2464	34.0282	12.0209	16.4433	62.1802	59.3701	162.622	Inf	32.482	94.0814	43.6028	0.96625	1.05439	1.03481	3.63498	5.83024	7.55668	1.18891	1.65788	0.987697	0.913604	0.818194	1.34393	1.14028	8.69567	4.68202	9.29267	1.30454	14.7879	11.2677
20	'Has ever used heroin'	10.2059	15.2351	14.9289	7.86258	11.4322	6.98828	15.1471	7.80293	7.02274	11.0141	2.82696	4.80689	5.47133	13.4705	17.2151	13.3794	9.76303	21.9311	43.9613	45.8621	14.7864	26.1094	151.437	113.911	Inf	162.622	54.4002	247.163	80.5504	0.940788	0.940994	1.06755	4.34033	7.80457	13.1723	1.56105	2.34065	1.11633	0.958204	0.713995	2.04945	1.37746	14.6372	5.46745	13.8558	1.21762	24.656	15.8131
21	'Has used cocaine*'	8.32499	13.427	11.4361	6.69449	8.5945	6.6743	10.9362	6.38712	5.55761	7.02042	2.67554	4.07568	4.62245	8.28325	28.1711	33.459	14.1928	16.1425	33.3675	33.7847	23.6276	26.6288	Inf	Inf	113.911	59.3701	29.1914	84.2299	42.8254	0.859839	1.16448	1.26502	3.36063	5.33078	8.3854	1.23282	1.82271	1.03999	0.928597	0.748024	1.60572	1.25645	10.3927	7.02429	14.074	1.30436	22.3494	22.4791
22	'Has ever used cocaine '	4.70515	6.1743	6.37604	3.43022	4.65542	4.5567	7.07971	3.87613	3.67441	4.76798	2.45347	3.21837	3.3521	5.53788	24.2042	9.42116	8.48807	8.81542	30.0098	30.1547	10.4678	13.3578	Inf	Inf	151.437	62.1802	17.1825	75.4415	34.0384	1.00188	1.33137	0.970647	2.71335	4.40634	5.51018	1.07282	1.24971	1.0041	0.968132	0.862047	1.2937	1.0272	5.60172	4.73404	8.29297	1.36237	20.8726	12.2426
23	'Used marijuana at school*'	7.45313	9.77104	10.7346	5.46742	6.12516	7.11604	8.77716	6.82807	3.71023	4.26805	2.15231	2.57863	2.93864	5.15689	11.6459	15.2083	9.21873	21.3683	Inf	Inf	Inf	Inf	13.3578	26.6288	26.1094	16.4433	13.7248	27.733	15.9395	0.820176	1.00294	1.20629	2.74601	3.36968	4.92219	1.0081	1.39071	1.03254	0.874554	0.838354	1.54495	1.04546	6.89129	5.10517	9.3863	1.71531	11.1568	10.3197
24	'Used marijuana*'	3.37122	4.29385	4.41087	2.39034	3.19777	3.64952	4.16283	3.10841	2.59907	2.86924	1.73498	1.85348	1.93389	2.46744	13.9073	11.645	8.70935	7.78039	Inf	Inf	Inf	Inf	10.4678	23.6276	14.7864	12.0209	6.89178	13.2808	14.1393	0.974469	1.08715	1.13428	1.96812	2.60161	2.90683	0.857828	1.16581	1.02724	0.922216	1.08627	1.21703	1.10474	3.18236	3.73312	6.84052	1.65432	9.12784	12.3415
25	'Age when first tried marijuana'	3.1175	3.3526	4.18004	1.99502	2.84884	3.52495	4.60576	3.0528	2.91452	3.37296	1.7868	1.89585	1.89377	2.57548	14.7648	7.96905	8.05846	7.7611	Inf	Inf	Inf	Inf	30.1547	33.7847	45.8621	34.0282	8.62284	21.5428	50.7351	1.06762	1.05951	1.17372	1.90469	2.73722	2.84946	0.843793	1.12262	1.00547	0.951241	1.12675	1.14441	1.13497	2.47612	3.11826	7.6519	1.71003	13.5281	13.7204
26	'Smoked marijuana'	3.09889	3.33529	4.14433	1.97573	2.84175	3.51494	4.60091	3.03365	2.89419	3.29615	1.77186	1.88681	1.88473	2.52723	14.4452	7.86847	7.98966	7.60299	Inf	Inf	Inf	Inf	30.0098	33.3675	43.9613	33.2464	8.43832	21.3204	50.2091	1.06886	1.05884	1.18293	1.88455	2.69563	2.75146	0.843201	1.12801	1.01438	0.958217	1.13349	1.14577	1.13596	2.48627	3.10499	7.56006	1.72112	13.5028	13.6584
27	'Has driven while drinking*'	4.3856	7.35268	6.85954	3.00019	4.45854	3.36294	5.96396	2.94418	3.16925	3.23961	1.55329	1.78312	1.89028	2.88022	Inf	Inf	22.578	10.3376	7.56006	7.6519	6.84052	9.3863	8.29297	14.074	13.8558	9.29267	8.36428	13.9039	8.02441	1.06859	0.762475	1.23412	2.08556	3.46174	3.34313	0.870594	1.05318	0.78462	0.848286	0.889193	1.14168	0.927929	6.01365	10.9765	Inf	1.41855	6.99544	8.96317
28	'Ridden with drunk driver *'	2.64824	3.6238	3.72725	2.5966	2.75281	2.51409	4.44788	2.46019	2.41174	2.49134	1.70942	1.64719	1.7518	2.18714	4.79101	5.95621	5.48624	5.10163	3.10499	3.11826	3.73312	5.10517	4.73404	7.02429	5.46745	4.68202	4.98207	6.16203	4.48914	0.982899	0.908543	1.27912	1.8459	2.61119	2.37835	0.922449	0.931373	0.928039	0.907674	1.04593	1.10951	1.15198	3.46642	Inf	10.9765	1.39492	3.12441	3.86234
29	'Does not wear seatbelt'	5.00446	8.20018	7.66456	4.49552	5.1994	3.371	6.8592	4.06211	3.78507	3.94579	1.80281	2.20509	2.47609	4.53259	1.40702	2.55958	2.99541	6.29848	2.48627	2.47612	3.18236	6.89129	5.60172	10.3927	14.6372	8.69567	9.81178	14.3869	5.61224	1.12265	1.54784	0.627903	2.87064	3.91744	4.76915	2.34148	3.24833	1.89043	1.31063	1.25665	2.81161	1.92233	Inf	3.46642	6.01365	2.73026	3.04528	3.7259
30	'Drank alcohol at school*'	5.74947	8.41185	9.44836	4.55001	5.92231	5.48636	7.67027	5.91932	3.3714	4.24268	2.37605	3.0496	3.30081	6.06446	Inf	Inf	15.3325	Inf	7.60299	7.7611	7.78039	21.3683	8.81542	16.1425	21.9311	11.9127	11.7053	20.6711	10.09	0.953337	0.96781	1.12735	2.63376	3.41159	4.81439	0.89506	1.33409	0.947082	0.962579	0.947164	1.30203	1.22218	6.29848	5.10163	10.3376	1.74948	5.35719	6.48348
31	'Had 5+ alcoholic drinks*'	3.33357	4.05476	4.49738	2.01356	2.87219	3.01076	4.12279	2.49968	2.27821	2.73234	1.71172	1.81227	1.75209	2.39974	Inf	Inf	Inf	15.3325	7.98966	8.05846	8.70935	9.21873	8.48807	14.1928	9.76303	8.11307	6.44649	9.17232	9.4067	0.965701	0.829126	1.25353	2.13931	3.07497	3.06104	0.821916	0.893897	0.746665	0.773182	0.915413	0.960591	0.983516	2.99541	5.48624	22.578	1.33038	6.87706	9.81033
32	'Drank alcohol*'	3.38518	4.16106	5.32728	2.13151	2.76045	3.06881	4.49717	2.38692	2.48159	2.70527	1.89794	1.96651	1.95156	2.78508	Inf	Inf	Inf	Inf	7.86847	7.96905	11.645	15.2083	9.42116	33.459	13.3794	8.8668	7.87574	11.661	12.7473	1.04042	0.879629	1.31465	2.19093	3.58056	3.4616	0.762458	0.857968	0.785168	0.822213	0.964733	0.964928	1.04984	2.55958	5.95621	Inf	1.36671	6.33952	12.9917
33	'Days had at least 1 drink of alcohol'	3.58527	4.20115	6.50399	1.88963	3.28912	3.35703	3.90758	2.41965	2.80649	3.50817	2.27634	2.66933	2.51924	3.32869	Inf	Inf	Inf	Inf	14.4452	14.7648	13.9073	11.6459	24.2042	28.1711	17.2151	20.2587	12.0549	14.5942	46.0503	1.15683	0.873444	1.47235	1.99975	3.51053	3.1768	0.780764	0.88614	0.889778	0.876737	1.0802	0.951173	1.03179	1.40702	4.79101	Inf	1.31311	10.9562	19.6129
34	'Smoked cigars*'	4.76427	5.81678	5.73788	3.01738	3.68797	3.7294	5.18958	3.40162	2.62766	2.85612	1.68472	1.99035	2.14432	2.99034	17.6779	11.8185	8.29267	6.82056	11.6139	11.7041	11.154	10.1418	7.85935	13.5428	12.5591	9.54338	8.39196	14.3097	9.19885	1.06157	0.880913	1.24132	1.96653	2.8604	3.03753	0.884043	1.10301	0.906251	0.78699	0.88398	1.05705	0.927402	3.90503	3.76438	7.4257	1.47252	14.3009	22.1444
35	'Has used snuff at school*'	9.67341	10.2729	11.2587	3.43696	4.85169	4.65866	7.24555	5.03087	3.15912	3.24876	1.41291	2.47163	2.62324	4.51485	33.4646	10.2794	9.32678	8.91443	6.49042	6.58385	5.0404	9.9711	7.2173	13.9737	20.7528	12.1254	16.0579	22.9695	8.4472	0.981249	0.668316	1.03834	2.02388	3.18741	3.87738	1.11956	1.56569	0.873292	0.688053	0.767874	1.3511	0.861207	6.77216	3.61713	8.59705	1.41599	16.4352	12.4422
36	'Used snuff*'	7.16796	7.90676	7.64255	2.67592	3.80194	3.79285	5.65799	3.5298	2.60956	2.53181	1.20381	1.88231	1.97669	2.94879	15.8921	8.29508	7.46465	5.98339	4.59698	4.62837	4.35727	6.75385	6.25971	11.0882	16.2736	9.18685	11.9846	16.5547	6.48258	0.939161	0.64909	1.05733	1.72381	2.87689	3.02959	0.945071	1.21922	0.911236	0.64749	0.824809	1.21767	0.700652	5.34518	2.97548	6.85458	1.36327	9.82544	9.91164
37	'Has ever smoked cigarettes daily'	3.72368	4.21539	5.2612	2.24822	3.32764	3.29557	4.43531	2.87853	3.08404	4.0075	2.13138	2.58601	2.69729	3.50826	21.0305	7.31975	7.04106	4.5355	17.4805	17.4781	8.95763	7.15224	10.4987	13.0291	12.4525	10.4568	7.46307	11.2959	9.56441	1.35784	1.71202	0.904791	2.54243	3.40001	3.22895	1.20523	1.45345	0.863366	0.877953	0.959667	1.07958	0.984054	5.10265	3.49379	6.66259	1.68358	Inf	52.8609
38	'Smoked cigarettes at school*'	6.1971	7.37194	9.34548	4.22527	5.55962	4.86294	7.32656	5.37017	3.84608	4.93595	2.41355	3.22288	3.61812	5.43312	24.9652	16.344	11.0138	11.0053	22.1744	22.3372	16.8712	23.8858	13.4351	20.7171	21.2575	14.3387	12.4185	22.2012	13.0361	0.942584	1.4792	1.1203	2.7249	3.92325	4.85703	1.2379	1.64564	0.923713	0.87323	1.0232	1.301	1.10369	7.75361	4.82014	10.9891	1.71086	Inf	Inf
39	'Has smoked*'	3.60248	3.89709	5.06809	2.37182	3.16716	3.17568	4.7206	2.7813	2.49461	3.42211	2.10524	2.42674	2.48595	3.24971	19.6129	12.9917	9.81033	6.48348	13.6584	13.7204	12.3415	10.3197	12.2426	22.4791	15.8131	11.2677	7.21193	14.1567	11.7515	1.13182	1.25822	1.0368	2.52399	3.40038	3.36537	0.994232	1.13353	0.85848	0.825465	0.974369	1.00214	0.991952	3.7259	3.86234	8.96317	1.47323	Inf	Inf
40	'Has ever smoked'	3.18021	3.43606	4.67994	2.33597	2.90459	2.95196	4.65193	2.62911	2.48924	3.58804	2.06273	2.11177	2.16602	2.85901	10.9562	6.33952	6.87706	5.35719	13.5028	13.5281	9.12784	11.1568	20.8726	22.3494	24.656	14.7879	7.56602	14.1773	16.8682	1.11576	1.19749	1.0829	2.34457	3.31871	3.34753	1.04072	1.14421	1.0258	0.945912	1.1349	1.13068	1.11014	3.04528	3.12441	6.99544	1.66093	Inf	Inf
41	'Times attempted suicide *'	2.57408	3.90091	5.08188	5.82816	5.60591	3.23762	6.36394	3.63864	3.98137	7.92066	10.0614	71.7616	36.2993	Inf	3.32869	2.78508	2.39974	6.06446	2.52723	2.57548	2.46744	5.15689	5.53788	8.28325	13.4705	7.69368	7.91184	14.6038	5.98245	1.08238	1.27357	0.883898	5.82891	4.68923	7.96227	1.21655	1.66971	1.08277	1.09069	1.01847	1.44013	1.2887	4.53259	2.18714	2.88022	1.30166	2.85901	3.24971
42	'Made a plan to commit suicide ^'	2.10709	2.3492	3.35861	3.1831	3.44883	2.24317	3.24071	2.35729	3.1284	4.73816	7.7992	37.9164	Inf	36.2993	2.51924	1.95156	1.75209	3.30081	1.88473	1.89377	1.93389	2.93864	3.3521	4.62245	5.47133	4.35297	4.18086	6.2631	3.5611	1.14583	1.36152	0.790248	4.0205	3.13445	5.11508	1.23357	1.4529	1.07127	1.14539	1.00409	1.15578	1.11788	2.47609	1.7518	1.89028	1.14915	2.16602	2.48595
43	'Has considered suicide ^'	1.81249	1.99502	2.8579	3.21116	3.06209	2.07932	3.00659	2.24688	2.97736	4.64135	9.21526	Inf	37.9164	71.7616	2.66933	1.96651	1.81227	3.0496	1.88681	1.89585	1.85348	2.57863	3.21837	4.07568	4.80689	3.88678	3.3929	5.05595	3.18704	1.18515	1.32357	0.827417	3.86234	2.94896	4.80697	1.15205	1.4385	1.03812	1.05918	0.992323	1.07828	1.16569	2.20509	1.64719	1.78312	1.16472	2.11177	2.42674
44	'Has felt sad/hopeless *'	1.45341	1.44341	1.89816	3.57166	2.89791	1.8717	2.6034	1.87772	2.90495	3.80555	Inf	9.21526	7.7992	10.0614	2.27634	1.89794	1.71172	2.37605	1.77186	1.7868	1.73498	2.15231	2.45347	2.67554	2.82696	2.90113	2.32408	3.4056	2.33941	1.2327	1.37473	0.846359	3.66285	2.69756	3.85883	1.06134	1.18426	1.01282	1.11318	1.07649	1.05989	1.23238	1.80281	1.70942	1.55329	1.13721	2.06273	2.10524
45	'Ever had sex '	2.62625	4.16014	3.57776	2.13256	2.5854	3.11184	4.57458	2.97828	4.92144	8.68067	1.78318	1.69818	1.66423	2.55868	5.51216	4.52199	4.96791	4.96147	6.91691	6.90697	5.93132	7.63534	7.45234	9.02042	11.5137	7.3965	5.48761	14.2184	9.47532	1.23378	0.971107	1.18443	1.74205	2.33061	2.21446	0.852807	1.16723	0.974465	0.953061	1.23108	1.21947	1.33213	3.23087	2.52156	5.85741	1.9213	5.36022	5.92855
46	'Forced to have sex '	2.27362	3.66898	3.84753	4.23181	4.4805	2.45195	4.77158	2.59489	7.03241	Inf	3.80555	4.64135	4.73816	7.92066	3.50817	2.70527	2.73234	4.24268	3.29615	3.37296	2.86924	4.26805	4.76798	7.02042	11.0141	7.31792	6.34751	12.3131	5.55328	1.09642	1.15931	0.664423	3.41504	3.78652	5.66448	1.26108	1.4164	1.04951	1.01675	1.03358	1.38646	1.74748	3.94579	2.49134	3.23961	1.18091	3.58804	3.42211
47	'Physically injured by boyfriend/girlfriend*'	2.83284	3.56049	3.78415	3.59475	4.03063	2.81109	3.81936	2.55928	Inf	7.03241	2.90495	2.97736	3.1284	3.98137	2.80649	2.48159	2.27821	3.3714	2.89419	2.91452	2.59907	3.71023	3.67441	5.55761	7.02274	4.61937	4.7136	7.2912	3.90826	1.12296	1.00211	0.838225	2.27246	2.72004	3.43268	1.11051	1.33645	1.0997	1.11322	1.11991	1.32745	1.46497	3.78507	2.41174	3.16925	1.58029	2.48924	2.49461
48	'Been in fight at school^'	4.77515	6.03175	6.08479	4.08077	6.13946	Inf	15.2275	Inf	2.55928	2.59489	1.87772	2.24688	2.35729	3.63864	2.41965	2.38692	2.49968	5.91932	3.03365	3.0528	3.10841	6.82807	3.87613	6.38712	7.80293	5.74475	6.0265	8.05521	4.54959	0.741774	0.879174	1.25752	1.76667	2.23891	2.61391	0.907471	1.39947	1.17447	0.941059	1.07194	1.22252	1.01594	4.06211	2.46019	2.94418	1.72764	2.62911	2.7813
49	'Injured in a fight*'	8.24453	9.55643	10.0163	8.97985	11.1818	Inf	Inf	15.2275	3.81936	4.77158	2.6034	3.00659	3.24071	6.36394	3.90758	4.49717	4.12279	7.67027	4.60091	4.60576	4.16283	8.77716	7.07971	10.9362	15.1471	9.97026	11.4155	18.045	8.51669	0.753031	0.802892	0.990236	2.68069	3.95559	5.15128	0.96445	1.3545	0.921304	0.864069	0.809982	1.2613	1.21713	6.8592	4.44788	5.96396	1.40024	4.65193	4.7206
50	'Been in fight^'	5.15913	7.04045	5.92801	3.47011	6.39688	Inf	Inf	Inf	2.81109	2.45195	1.8717	2.07932	2.24317	3.23762	3.35703	3.06881	3.01076	5.48636	3.51494	3.52495	3.64952	7.11604	4.5567	6.6743	6.98828	5.82328	5.89109	10.3165	4.91137	0.772862	0.817691	1.27354	1.76795	1.99758	2.28858	0.773805	1.08243	1.13112	0.900594	0.998659	1.16963	0.978007	3.371	2.51409	3.36294	1.76596	2.95196	3.17568
51	'Been threatened at school^'	5.79297	7.53027	8.01405	9.28505	Inf	6.39688	11.1818	6.13946	4.03063	4.4805	2.89791	3.06209	3.44883	5.60591	3.28912	2.76045	2.87219	5.92231	2.84175	2.84884	3.19777	6.12516	4.65542	8.5945	11.4322	7.42295	7.87908	13.3765	5.7112	0.881488	0.847808	0.849461	2.59846	3.04574	3.92038	1.16938	1.49221	0.967504	0.898689	0.84934	1.32295	1.15006	5.1994	2.75281	4.45854	1.27258	2.90459	3.16716
52	'Felt unsafe at school*'	3.08753	4.535	5.34875	Inf	9.28505	3.47011	8.97985	4.08077	3.59475	4.23181	3.57166	3.21116	3.1831	5.82816	1.88963	2.13151	2.01356	4.55001	1.97573	1.99502	2.39034	5.46742	3.43022	6.69449	7.86258	5.55581	6.41007	8.7221	3.76115	0.849017	1.04345	0.84256	3.27703	3.34315	3.68788	1.06352	1.19924	0.89665	0.938729	0.917046	1.41204	1.28416	4.49552	2.5966	3.00019	1.22485	2.33597	2.37182
53	'Carried weapon at school'	Inf	17.988	Inf	5.34875	8.01405	5.92801	10.0163	6.08479	3.78415	3.84753	1.89816	2.8579	3.35861	5.08188	6.50399	5.32728	4.49738	9.44836	4.14433	4.18004	4.41087	10.7346	6.37604	11.4361	14.9289	10.0286	10.4148	16.7371	7.43274	1.06334	0.939822	0.915379	1.97893	2.98673	3.58553	1.19	1.67672	1.09118	0.858691	0.937008	1.44233	1.19521	7.66456	3.72725	6.85954	1.66526	4.67994	5.06809
54	'Carried a gun*'	Inf	Inf	17.988	4.535	7.53027	7.04045	9.55643	6.03175	3.56049	3.66898	1.44341	1.99502	2.3492	3.90091	4.20115	4.16106	4.05476	8.41185	3.33529	3.3526	4.29385	9.77104	6.1743	13.427	15.2351	9.36421	11.3093	17.8776	7.07159	0.857964	0.708548	0.996329	1.72217	2.84887	3.47837	0.939655	1.48451	0.982819	0.798452	0.871034	1.47329	1.09382	8.20018	3.6238	7.35268	1.61023	3.43606	3.89709
55	'Carried a weapon '	Inf	Inf	Inf	3.08753	5.79297	5.15913	8.24453	4.77515	2.83284	2.27362	1.45341	1.81249	2.10709	2.57408	3.58527	3.38518	3.33357	5.74947	3.09889	3.1175	3.37122	7.45313	4.70515	8.32499	10.2059	6.68499	7.39291	12.3106	5.23677	0.948202	0.91804	0.972353	1.61225	2.19638	2.14867	0.919004	1.17159	1.05312	0.748273	0.873752	1.09776	0.902817	5.00446	2.64824	4.3856	1.60678	3.18021	3.60248
[truncated: 7 more columns]

## Sheet: 2009 Normalized OR
Question #	Questions	Carried a weapon	Carried a gun*	Carried weapon at school	Felt unsafe at school*	Been threatened at school^	Been in fight^	Injured in a fight*	Been in fight at school^	Physically injured by boyfriend/girlfriend*	Forced to have sex	Has felt sad/hopeless *	Has considered suicide ^	Made a plan to commit suicide ^	Times attempted suicide *	Days had at least 1 drink of alcohol	Drank alcohol*	Had 5+ alcoholic drinks*	Drank alcohol at school*	Smoked marijuana	Age when first tried marijuana	Used marijuana*	Used marijuana at school*	Has ever used cocaine	Has used cocaine*	Has ever used heroin	Has ever used methamphetamines	Has ever used steroids	Has ever used injected drugs	Has ever used ecstasy	Does not go to PE class+	Has not participated in sports^	Watches TV	Has fasted to lose weight *	Has taken pill to lose weight *	Has vomited to lose weight*	No fruit juice+	No fruit+	No green salad+	No potatoes+	No carrots	No vegetables+	No milk+	Does not wear seatbelt	Ridden with drunk driver *	Has driven while drinking*	Does not wear sunscreen	Has ever smoked	Has smoked*
1	'Does not wear sunscreen'	0.198502	0.201591	0.250071	-0.19307	-0.137922	0.334775	0	0.303127	0.174512	-0.245777	-0.300177	-0.265686	-0.285111	-0.105317	-0.0926911	-0.0349673	-0.0738343	0.32125	0.297671	0.288349	0.240566	0.292792	-0.0395537	-0.102335	-0.201614	-0.102136	-0.220138	-0.0843529	-0.0927559	-0.192148	-0.00103717	-0.55468	-0.156122	-0.223571	-0.390503	-0.00778431	0.594698	0.344978	0.0812032	0.35507	0.533071	0.154329	0.963364	-0.0054934	0.0187465	0.963364	0.246318	0.0733117
2	'No milk+'	-0.351609	-0.0747397	0.053153	0.156712	-0.00240212	-0.236199	0.0793661	-0.181299	0.346759	0.601165	0.0973358	0.0170754	-0.043351	0.161806	-0.158966	-0.133946	-0.228094	0.085343	-0.0202072	-0.0214605	-0.0604067	-0.139972	-0.165404	0.125242	0.257894	-0.0147262	-0.0380879	0.471397	-0.100781	0.316815	0.437555	-0.789806	0.324002	0.35714	0.631509	0.832922	1.20913	0.557355	0.709006	0.810963	0.9337	1.20913	0.738742	0	-0.312029	0.435889	-0.053367	-0.215773
3	'No vegetables+'	-0.245056	0.179424	0.148784	0.118168	0.0241453	-0.153561	-0.0447035	-0.0897573	0.0290354	0.0917885	-0.2957	-0.270885	-0.170747	0.146579	-0.451837	-0.431124	-0.437623	0.00114437	-0.183299	-0.185015	-0.096255	0.247945	-0.00811732	0.303604	0.655619	0.0468436	0.500506	0.758147	-0.209666	-0.205527	0.292749	-0.799336	0.0600535	-0.0862256	0.0845472	1.0127	2.07633	1.73784	1.24258	1.97138	2.07633	0.758197	1.11178	-0.22969	-0.188458	0.639129	-0.20242	-0.376531
4	'No carrots'	-0.183587	-0.188082	-0.0827488	-0.113817	-0.224469	0.00918119	-0.292921	0.111343	0.174503	0.0587672	0.117453	0	0.0170003	0.0375237	0.122411	-0.04068	-0.116388	-0.0671962	0.191884	0.183288	0.130497	-0.243251	-0.203045	-0.407726	-0.474897	-0.278367	-0.313069	-0.3723	-0.300175	0.300616	0.492034	0.112048	-0.140052	-0.215461	-0.221465	1.05846	1.88071	1.91951	1.36335	2.36211	2.36211	1.0262	0.340702	0.0759085	-0.158313	0.851862	0.193679	-0.0263429
5	'No potatoes+'	-0.346246	-0.252604	-0.147672	-0.0191027	-0.081988	-0.0789336	-0.138664	-0.0155251	0.226858	0.0960766	0.226806	0.155068	0.267959	0.197363	-0.117666	-0.210298	-0.299002	0.0170938	0.0105423	0	-0.0447063	-0.121264	0.0253924	-0.0347578	0.0105219	-0.0582411	-0.113855	0.0789104	-0.0811696	0.360876	0.615049	-0.293643	0.103785	0.0508431	0.360556	0.993037	1.44178	1.2432	1.69431	1.42435	1.69431	0.985238	0.462379	-0.067636	-0.16526	0.638995	-0.0081046	-0.204604
6	'No green salad+'	0.0540654	-0.0456078	0.105282	-0.177988	-0.0682662	0.15715	-0.138857	0.211402	0.116499	0.0491122	-0.00222079	0.033374	0.0787142	0.0941265	-0.189088	-0.369532	-0.442073	-0.0990447	0	-0.0127315	0.0181671	0.0255903	-0.0147045	0.0359689	0.138158	-0.0384656	-0.241644	0.288587	-0.118808	0.211597	0.581479	-0.0760492	-0.339029	-0.3545	-0.298146	1.09641	1.9918	2.09685	1.15048	1.88779	2.09685	0.740864	0.898112	-0.128348	-0.370539	0.810047	0.0161479	-0.24075
7	'No fruit+'	-0.273757	0.0677548	0.243415	-0.240115	0.0752182	-0.387961	-0.0644699	-0.0173523	-0.0838277	0	-0.25825	0.0223304	0.0367073	0.237363	-0.676624	-0.723234	-0.66405	-0.086376	-0.328453	-0.335363	-0.280892	-0.0264076	-0.180638	0.363854	0.724678	0.227106	0.37226	0.853976	-0.150983	0.0274667	0.558133	-1.28209	-0.222027	0.0262345	0.438215	1.58603	1.95372	1.51017	0.867434	1.36736	1.95372	0.91101	1.19747	-0.604801	-0.427484	0.578142	-0.307874	-0.321413
8	'No fruit juice+'	-0.284791	-0.252731	0.0880248	-0.0740822	0.0628127	-0.532891	-0.215156	-0.30301	-0.0117151	0.171728	-0.0770425	0.0412639	0.139905	0.119862	-0.519976	-0.554205	-0.44587	-0.322878	-0.408985	-0.407972	-0.384174	-0.151289	-0.0615312	0.139032	0.479586	0.0867052	0.07689	0.667658	-0.38404	0.335998	0.58432	-0.744915	0.106728	0.32754	0.583218	1.92532	1.92532	0.954085	0.757986	0.884404	1.22939	0.874102	1.06449	-0.279392	-0.362862	0.314957	-0.105356	-0.17128
9	'Has vomited to lose weight*'	-0.647322	0.0476439	0.0914211	0.132026	0.220228	-0.556315	0.614165	-0.364556	0.0285695	0.751177	0.197397	0.514361	0.60399	1.24241	-0.0831925	0.0406718	-0.136744	0.516588	-0.290569	-0.240078	-0.21132	0.548534	0.711335	1.31711	1.96867	1.16699	1.21875	1.74905	0.809955	-1.64449	-1.72525	-2.39359	2.23211	2.44956	2.44956	-1.00461	-0.81032	-2.02831	-1.46233	-1.98335	-1.2866	-0.915142	0.502966	-0.500807	-0.00956727	-1.65559	-0.0076684	0
10	'Has taken pill to lose weight *'	-0.471667	-0.0964012	-0.0282241	0.134414	0	-0.60854	0.377101	-0.443994	-0.163165	0.31408	-0.175135	-0.0465851	0.0414193	0.622558	0.204898	0.233395	0.0137824	0.163653	-0.17617	-0.154079	-0.227389	0.145818	0.532789	0.807554	1.35753	0.936763	0.924326	1.48407	0.518592	-1.47988	-1.43993	-2.09052	1.61512	2.59354	2.59354	-1.11632	-1.07833	-1.94069	-1.62807	-1.83337	-1.3134	-1.04554	0.36312	-0.222083	0.184706	-1.34469	0.123831	0.158904
11	'Has fasted to lose weight *'	-0.408068	-0.312919	-0.112421	0.615243	0.28051	-0.275068	0.325463	-0.276115	0.0871099	0.674758	0.775822	0.85233	0.910231	1.44608	-0.0973243	0.0343997	0	0.299982	-0.182927	-0.16759	-0.120324	0.360193	0.342931	0.651588	1.02066	0.764802	0.590622	1.09171	0.423616	-1.05077	-0.835146	-1.34856	2.88573	2.12477	2.88573	-0.827483	-0.81694	-1.41557	-1.06548	-1.24831	-0.657474	-0.569027	0.424231	-0.212823	-0.0367084	-0.767592	0.13218	0.238563
12	'Watches TV'	-0.0262926	0.00885022	-0.113403	-0.232993	-0.221226	0.362997	0	0.344734	-0.240436	-0.575671	-0.226502	-0.259159	-0.325467	-0.163894	0.572278	0.408837	0.340156	0.187089	0.25652	0.24524	0.195933	0.284734	-0.0288258	0.353316	0.108455	0.0635162	0.253031	-0.28334	-0.0896604	-0.451489	-0.50088	0.572278	-0.237259	-0.469568	-0.628665	-0.567826	-0.765706	-0.0412884	-0.351605	0.115086	-0.405563	-0.571536	-0.65723	0.369305	0.317638	-0.0548494	0.129051	0.0662888
13	'Has not participated in sports^'	-0.205855	-0.579547	-0.172025	-0.0211198	-0.320676	-0.372857	-0.399207	-0.268264	-0.0794456	0.130779	0.376668	0.321946	0.362733	0.266397	-0.277698	-0.267517	-0.35282	-0.129688	0	0.000910687	0.0380642	-0.0782471	0.330431	0.137202	-0.170227	-0.0060785	-0.412941	-0.223594	0.0647657	0.847218	0.977879	-0.59752	0.179514	0.0843799	-0.0569653	0.664769	0.977879	0.5196	0.460447	0.398432	0.589882	0.559185	0.547775	-0.220857	-0.473723	0.402153	0.177523	0.248902
14	'Does not go to PE class+'	-0.171137	-0.315413	-0.005798	-0.330537	-0.276389	-0.466119	-0.503621	-0.525352	0.0729021	0.0383947	0.207421	0.150666	0.101996	0.0198011	0.115776	-0.0372361	-0.144754	-0.163344	0.00166408	0	-0.131713	-0.380397	-0.0916867	-0.312265	-0.18246	-0.143934	-0.464754	-0.267278	0.0505766	0.8353	0.8353	-0.560047	-0.048031	0.0325067	0.0118768	0.40453	0.435295	0.137799	0.194357	0.195096	0.0796877	0.426528	0.0725065	-0.119287	0.00130801	0.199124	0.0636292	0.0842433
15	'Offered drugs at school ^'	0	0.124966	0.399258	-0.328496	0.44732	-0.0368313	0.182584	0.0341217	-0.168604	-0.165588	-0.496173	-0.325176	-0.167095	-0.100328	0.247406	-0.098276	-0.0473638	1.01477	0.340162	0.337948	0.447527	1.86766	0.907044	1.20648	1.36364	1.17832	0.667743	1.39596	0.884425	-1.45122	-1.46682	-1.3656	-0.476521	-0.218088	0.0557654	-1.6496	-1.43165	-1.43234	-1.47638	-1.52011	-1.40549	-1.3908	-0.407231	-0.313277	0.145826	-1.0401	0.0249942	0.0849976
16	'Has ever used ecstasy'	-0.192059	0.241298	0.313156	-0.669562	-0.0669438	-0.284611	0.509555	-0.394999	-0.614212	-0.107397	-1.35459	-0.908522	-0.748414	0	2.9444	1.09139	0.652952	0.754111	3.06914	3.08418	1.2409	1.4138	2.50836	2.83966	3.75108	2.86561	1.69819	3.14378	3.75108	-2.43576	-2.43349	-2.68455	-1.05998	-0.455352	-0.020016	-2.80184	-2.22949	-2.67894	-2.73402	-2.89203	-2.41079	-2.4774	-0.0921605	-0.414299	0.423658	-2.18782	1.4955	0.974035
17	'Has ever used injected drugs'	-0.000290131	0.537961	0.442855	-0.497443	0.119515	-0.255243	0.551411	-0.612198	-0.755964	0	-1.85421	-1.28414	-0.975242	0.246148	0.245201	-0.0785054	-0.424833	0.747423	0.792045	0.807016	0.109146	1.17141	2.61517	2.77414	4.3272	2.93372	2.2871	4.3272	2.1024	-3.795	-3.76323	-3.91961	-1.43326	-0.531262	-0.122308	-2.79153	-2.26591	-3.31293	-3.61533	-4.00554	-2.48436	-2.94661	0.224563	-0.998713	0.175296	-3.2208	0.203391	0.201294
18	'Has ever used steroids'	0	0.613291	0.49442	-0.205803	0.0918841	-0.327609	0.626781	-0.294821	-0.649314	-0.219952	-1.66948	-1.12362	-0.822343	0.0978713	0.705409	0.0912735	-0.197629	0.662948	0.190814	0.222021	-0.101267	0.892575	1.21673	1.98133	2.8794	2.13542	3.02308	3.02308	1.39279	-3.25649	-3.2166	-2.64727	-1.19838	-0.355024	0.0833784	-2.64632	-2.01165	-3.10718	-3.07211	-3.21033	-2.00602	-2.72012	0.408373	-0.569396	0.178099	-2.62061	0.033393	-0.0357575
19	'Has ever used methamphetamines'	-0.202748	0.283483	0.382369	-0.469676	-0.0516821	-0.401842	0.373958	-0.421429	-0.735979	-0.0722402	-1.40706	-0.9851	-0.821673	0	1.3968	0.204739	0.0765742	0.630757	2.11145	2.14499	0.643798	1.09576	3.01471	2.94799	4.4017	4.4017	2.07789	3.61216	2.50268	-2.99321	-2.86727	-2.89431	-1.08173	-0.400118	-0.0259216	-2.69403	-2.21434	-2.96153	-3.07403	-3.23316	-2.51721	-2.75429	0.176623	-0.716544	0.27242	-2.56014	0.94267	0.550451
20	'Has ever used heroin'	-0.287036	0.290957	0.261671	-0.663364	-0.123336	-0.83343	0.282603	-0.674352	-0.826333	-0.177093	-2.13911	-1.37326	-1.18648	0.113362	0.467233	0.103572	-0.351038	0.816536	1.81979	1.88086	0.247831	1.06813	3.60421	3.1934	4.31095	3.70701	2.12717	4.31095	2.69345	-3.72643	-3.72611	-3.54407	-1.52056	-0.674049	0.0810636	-2.99585	-2.41146	-3.4796	-3.69996	-4.12438	-2.60313	-3.17636	0.233202	-1.1875	0.15405	-3.35431	0.985501	0.34468
21	'Has used cocaine*'	-0.115746	0.573868	0.342331	-0.43022	-0.0697807	-0.434579	0.27785	-0.49803	-0.698731	-0.361638	-1.75337	-1.14615	-0.964536	-0.122999	1.64295	1.89113	0.65389	0.8396	1.88718	1.9051	1.38921	1.56172	3.65857	3.65857	3.65857	2.71847	1.69428	3.22307	2.2472	-3.39106	-2.95351	-2.83403	-1.42446	-0.758849	-0.105315	-2.87123	-2.30711	-3.11662	-3.28007	-3.59204	-2.48997	-2.84384	0.204303	-0.360843	0.641765	-2.78986	1.30897	1.31732
22	'Has ever used cocaine '	-0.251629	0.140406	0.186791	-0.707569	-0.266958	-0.29788	0.33782	-0.531253	-0.608358	-0.232493	-1.19105	-0.799541	-0.740804	-0.0165378	2.11131	0.750035	0.599566	0.654158	2.42149	2.42844	0.902009	1.25374	4.75671	4.75671	4.75671	3.47251	1.617	3.75142	2.60322	-2.48316	-2.07296	-2.52885	-1.0458	-0.346289	-0.0237704	-2.38447	-2.16428	-2.47997	-2.5326	-2.70003	-2.11437	-2.44716	0	-0.2428	0.566019	-2.03975	1.89767	1.12797
23	'Used marijuana at school*'	0.0594519	0.450117	0.585801	-0.387533	-0.223648	-0.00731964	0.29536	-0.0669172	-0.946886	-0.744816	-1.73251	-1.47179	-1.28324	-0.471894	0.703357	1.08839	0.366174	1.57901	1.95514	1.95514	1.95514	1.95514	0.901213	1.89652	1.8681	1.20104	0.940323	1.95514	1.15614	-3.12439	-2.83416	-2.56782	-1.38106	-1.08578	-0.539095	-2.82675	-2.36257	-2.7922	-3.03178	-3.09276	-2.21083	-2.77425	-0.0536214	-0.486436	0.392162	-2.05993	0.641452	0.528941
24	'Used marijuana*'	-0.191642	0.157361	0.196151	-0.687699	-0.267845	-0.0772073	0.112653	-0.308734	-0.566919	-0.424245	-1.14999	-1.05468	-0.993404	-0.641895	1.85286	1.59673	1.17765	1.01493	2.61749	2.61749	2.61749	2.61749	1.44297	2.61749	1.94129	1.64256	0.839963	1.78635	1.87673	-1.98222	-1.82436	-1.76313	-0.968092	-0.565509	-0.405466	-2.16615	-1.72357	-1.90614	-2.06174	-1.82553	-1.66155	-1.8012	-0.274816	-0.0445315	0.829194	-1.21867	1.24536	1.68053
25	'Age when first tried marijuana'	-0.177216	-0.0723264	0.245912	-0.821198	-0.307229	0	0.385833	-0.207473	-0.274348	-0.0635898	-0.980226	-0.894762	-0.89634	-0.452763	2.06648	1.1768	1.1929	1.13866	3.84731	3.84731	3.84731	3.84731	3.09671	3.26069	3.70162	3.27105	1.29056	2.61153	3.84731	-1.7232	-1.73421	-1.58652	-0.888051	-0.364892	-0.306917	-2.06264	-1.65074	-1.80973	-1.88972	-1.64543	-1.623	-1.63495	-0.509524	-0.176864	1.11821	-1.04358	1.94028	1.96065
26	'Smoked marijuana'	-0.181747	-0.0756866	0.23764	-0.831112	-0.306722	0	0.388421	-0.212447	-0.280342	-0.0927174	-0.988233	-0.89755	-0.899143	-0.475945	2.03902	1.16258	1.18463	1.11307	3.83638	3.83638	3.83638	3.83638	3.09386	3.24687	3.64466	3.24163	1.26346	2.60066	3.83638	-1.71743	-1.73102	-1.57113	-0.899283	-0.382877	-0.353303	-2.05955	-1.63972	-1.79289	-1.87507	-1.63273	-1.61718	-1.62959	-0.499517	-0.178909	1.1049	-1.03015	1.94168	1.95822
27	'Has driven while drinking*'	-0.443498	0.302	0.201841	-0.991218	-0.419701	-0.826548	0	-1.01841	-0.912127	-0.880448	-1.94094	-1.74186	-1.65767	-1.05009	1.92057	1.92057	1.92057	0.793557	0.342128	0.359547	0.197836	0.654286	0.475619	1.23869	1.21615	0.639824	0.487971	1.22115	0.428125	-2.48056	-2.96751	-2.27279	-1.51583	-0.784772	-0.835072	-2.7762	-2.50152	-2.9262	-2.81365	-2.7457	-2.38511	-2.68418	0.0119715	0.880079	1.92057	-2.07185	0.230144	0.587739
28	'Ridden with drunk driver *'	-0.168089	0.28438	0.324991	-0.196496	-0.112215	-0.243084	0.579997	-0.274353	-0.303047	-0.2562	-0.799616	-0.853116	-0.764285	-0.444075	0.687206	1.00127	0.882696	0.777836	0.0614682	0.0676184	0.327259	0.778837	0.669949	1.23923	0.877747	0.654008	0.743624	1.05028	0.593316	-1.59801	-1.7115	-1.21797	-0.688801	-0.188413	-0.323164	-1.68958	-1.67569	-1.68086	-1.71288	-1.50833	-1.4232	-1.36901	0.220323	1.88323	1.88323	-1.09294	0.0704619	0.376353
29	'Does not wear seatbelt'	0.402895	1.11534	1.01788	0.24817	0.458027	-0.167143	0.857721	0.101909	0	0.0599941	-1.07007	-0.779479	-0.612253	0.260018	-1.42768	-0.564413	-0.337566	0.734685	-0.606337	-0.612238	-0.250223	0.864454	0.565551	1.45718	1.95125	1.19998	1.3742	1.92636	0.568257	-1.75341	-1.29006	-2.59171	-0.398945	0.0495932	0.333412	-0.692897	-0.220623	-1.0016	-1.53006	-1.59074	-0.428923	-0.977462	1.95125	-0.126874	0.667922	-0.471281	-0.313747	-0.0227289
30	'Drank alcohol at school*'	-0.0420029	0.506991	0.674633	-0.379561	0.000727689	-0.109583	0.373846	0	-0.812082	-0.480457	-1.31686	-0.956814	-0.842609	0.0349478	1.88947	1.88947	1.37309	1.88947	0.361135	0.390829	0.394411	1.85197	0.574598	1.44736	1.88947	1.009	0.983659	1.80411	0.769417	-2.63437	-2.61264	-2.3925	-1.16831	-0.794986	-0.298077	-2.72538	-2.14958	-2.64387	-2.62046	-2.64375	-2.18467	-2.27597	0.0895723	-0.214474	0.804395	-1.75851	-0.143954	0.131337
31	'Had 5+ alcoholic drinks*'	-0.282548	0	0.149468	-1.00987	-0.497466	-0.42949	0.0240027	-0.697875	-0.831717	-0.569483	-1.24417	-1.16182	-1.21054	-0.756739	2.47723	2.47723	2.47723	1.91891	0.978516	0.990888	1.10295	1.18495	1.06582	1.80747	1.26771	1.00063	0.668896	1.17767	1.21407	-2.06997	-2.28995	-1.69362	-0.922473	-0.399043	-0.405595	-2.30255	-2.18144	-2.44109	-2.39074	-2.14712	-2.07762	-2.0436	-0.436864	0.4362	2.47723	-1.60778	0.762175	1.27468
32	'Drank alcohol*'	-0.297719	0	0.356448	-0.965078	-0.592047	-0.439273	0.112066	-0.801801	-0.745685	-0.621177	-1.13252	-1.08132	-1.09233	-0.579234	3.00737	3.00737	3.00737	3.00737	0.91913	0.937455	1.48468	1.86983	1.17895	3.00737	1.68499	1.09146	0.920463	1.48666	1.61517	-1.99979	-2.24199	-1.66227	-0.925409	-0.216765	-0.265515	-2.44822	-2.27796	-2.40588	-2.33937	-2.10875	-2.10846	-1.98678	-0.701047	0.517442	3.00737	-1.60625	0.607421	1.64257
33	'Days had at least 1 drink of alcohol'	-0.124192	0.10451	0.73505	-1.04817	-0.248571	-0.219087	0	-0.691473	-0.477506	-0.155556	-0.779558	-0.549798	-0.633287	-0.23132	3.55886	3.55886	3.55886	3.55886	1.88625	1.91781	1.8315	1.57548	2.63091	2.84987	2.13933	2.3742	1.62528	1.90105	3.55886	-1.7561	-2.16149	-1.40815	-0.966455	-0.154584	-0.298701	-2.32332	-2.14067	-2.13476	-2.15606	-1.85498	-2.03849	-1.92113	-1.47363	0.294054	3.55886	-1.57329	1.4874	2.32746
34	'Smoked cigars*'	0	0.287964	0.26826	-0.658962	-0.369431	-0.353315	0.12336	-0.486033	-0.858479	-0.738198	-1.49974	-1.25924	-1.15174	-0.671946	1.89162	1.31072	0.799579	0.517633	1.28553	1.29668	1.22724	1.08998	0.722154	1.50719	1.39841	1.00224	0.816751	1.58667	0.949196	-2.16605	-2.43519	-1.94038	-1.2766	-0.736042	-0.649358	-2.43007	-2.11082	-2.39427	-2.59784	-2.43017	-2.17221	-2.36099	-0.286924	-0.339844	0.64027	-1.69397	1.58578	2.21662
35	'Has used snuff at school*'	0.940486	1.02724	1.15943	-0.552404	-0.0550497	-0.113622	0.523558	-0.00272878	-0.674015	-0.633646	-1.83487	-1.02807	-0.942186	-0.158859	2.73103	1.02815	0.887842	0.822604	0.364775	0.385393	0	0.984216	0.517922	1.4711	2.0417	1.26642	1.67167	2.18811	0.744935	-2.36085	-2.91494	-2.27926	-1.31641	-0.661153	-0.378454	-2.1706	-1.68674	-2.529	-2.87295	-2.7146	-1.89941	-2.54911	0.426079	-0.478691	0.770304	-1.83173	1.70518	1.30363
36	'Used snuff*'	0.71814	0.859663	0.810631	-0.703388	-0.196687	-0.200141	0.376867	-0.303835	-0.739618	-0.783256	-1.85582	-1.21092	-1.14034	-0.5633	1.86681	0.928833	0.776652	0.457539	0.0772616	0.0870808	0	0.632288	0.522673	1.34752	1.90104	1.07615	1.45969	1.92575	0.573144	-2.21398	-2.74693	-2.043	-1.33783	-0.598915	-0.5243	-2.20493	-1.83747	-2.25753	-2.75049	-2.40129	-1.8393	-2.63665	0.294815	-0.550301	0.653645	-1.67635	1.1731	1.1857
37	'Has ever smoked cigarettes daily'	-0.178939	0	0.319725	-0.906884	-0.341169	-0.355139	0.0733697	-0.550334	-0.450846	-0.0729631	-0.983878	-0.704937	-0.644157	-0.264911	2.31875	0.796128	0.740125	0.105594	2.05201	2.05181	1.08745	0.762728	1.31647	1.628	1.5627	1.31071	0.824102	1.42206	1.18201	-1.63435	-1.29997	-2.22001	-0.729456	-0.310128	-0.384603	-1.80635	-1.53619	-2.28762	-2.26345	-2.13506	-1.96519	-2.09886	0.27558	-0.270873	0.660416	-1.32414	3.64846	3.64846
38	'Smoked cigarettes at school*'	-0.241542	0.00890815	0.351133	-0.794094	-0.39815	-0.591308	0	-0.448169	-0.92975	-0.569808	-1.60198	-1.18478	-1.01789	-0.431355	1.76871	1.15755	0.5881	0.586991	1.59769	1.60824	1.20336	1.70495	0.874798	1.49961	1.53677	0.968711	0.761282	1.59943	0.831301	-2.95844	-2.30832	-2.70925	-1.42693	-0.901088	-0.593063	-2.56524	-2.15449	-2.98762	-3.0687	-2.84005	-2.49352	-2.7308	0.0817319	-0.604062	0.584867	-2.09841	2.54631	2.54631
39	'Has smoked*'	-0.100486	0.0129212	0.391966	-0.703479	-0.286287	-0.282408	0.289495	-0.473714	-0.630664	-0.174591	-0.875494	-0.670456	-0.63568	-0.249165	2.34426	1.75005	1.34483	0.747293	1.82225	1.82877	1.67597	1.41786	1.66437	2.54104	2.03357	1.54465	0.900909	1.87394	1.6053	-1.77083	-1.61809	-1.89734	-0.613768	-0.183779	-0.19871	-1.95782	-1.76866	-2.16962	-2.2262	-1.98694	-1.94639	-1.96113	-0.0518852	0	1.21453	-1.39049	3.77465	3.77465
40	'Has ever smoked'	-0.111631	0	0.445735	-0.556731	-0.242422	-0.219082	0.437076	-0.38618	-0.46505	0.0624415	-0.736197	-0.702305	-0.665705	-0.265241	1.67292	0.883619	1.00104	0.640723	1.97443	1.97713	1.40952	1.69909	2.60279	2.70141	2.84311	2.10559	1.13878	2.04476	2.29548	-1.62272	-1.52075	-1.66586	-0.55143	-0.0501313	-0.0376571	-1.72318	-1.5864	-1.744	-1.86098	-1.59819	-1.60356	-1.63001	-0.174182	-0.13717	1.02566	-1.04876	2.84311	2.84311
41	'Times attempted suicide *'	-0.446697	0.153056	0.534607	0.732285	0.676193	-0.115821	0.859164	0.0526428	0.182508	1.17486	1.52	4.35438	3.37111	4.35438	-0.0758017	-0.333037	-0.547877	0.789623	-0.473202	-0.445914	-0.507739	0.555744	0.658577	1.23944	1.94097	1.13292	1.17326	2.05751	0.769981	-1.69655	-1.46188	-1.9888	0.732471	0.418594	1.18242	-1.52796	-1.07116	-1.69602	-1.68551	-1.78435	-1.28456	-1.44484	0.369581	-0.681709	-0.284579	-1.4304	-0.295242	-0.110445
42	'Made a plan to commit suicide ^'	-0.238545	-0.0816295	0.434068	0.356639	0.472312	-0.148257	0.382513	-0.0766674	0.331628	0.930531	1.64953	3.93095	3.93095	3.86807	0.0191912	-0.34917	-0.504722	0.409026	-0.399439	-0.392532	-0.362287	0.241355	0.431271	0.894863	1.1381	0.808205	0.750003	1.33308	0.518527	-1.1174	-0.868579	-1.65342	0.693579	0.334416	1.04096	-1.01096	-0.774858	-1.21448	-1.11795	-1.30791	-1.10493	-1.15303	-0.00572934	-0.504959	-0.395199	-1.11323	-0.198746	0
43	'Has considered suicide ^'	-0.314234	-0.175807	0.342744	0.510883	0.442304	-0.116095	0.415917	-0.00428375	0.401822	1.04234	2.03182	4.99293	4.07254	4.99293	0.244266	-0.196576	-0.314415	0.436408	-0.256261	-0.249367	-0.281975	0.194394	0.51412	0.854832	1.09289	0.786364	0.59031	1.16577	0.500005	-0.927142	-0.76778	-1.44552	0.777264	0.387997	1.09292	-0.968012	-0.647649	-1.11823	-1.08926	-1.18333	-1.06348	-0.95102	-0.03137	-0.452204	-0.337804	-0.952221	-0.0937604	0.10681
44	'Has felt sad/hopeless *'	-0.385157	-0.395118	0	0.911993	0.610412	-0.0202513	0.455798	-0.0156185	0.613915	1.0035	2.40615	2.27943	2.03873	2.40615	0.262117	-0.000167381	-0.149153	0.323967	-0.0993327	-0.0872215	-0.129682	0.181285	0.370223	0.49523	0.574654	0.612017	0.292059	0.843307	0.301542	-0.622776	-0.465447	-1.16526	0.948366	0.507058	1.02356	-0.838709	-0.680619	-0.906215	-0.769911	-0.818264	-0.840682	-0.623149	-0.074354	-0.151093	-0.289272	-0.739102	0.119957	0.149382
45	'Ever had sex '	-0.501732	0.161893	-0.0556824	-0.802154	-0.524351	-0.256971	0.298902	-0.320256	0.404342	1.22307	-1.06028	-1.13074	-1.15988	-0.53934	0.567881	0.28222	0.417902	0.41603	0.895391	0.893316	0.673615	1.03796	1.00296	1.27846	1.63055	0.992106	0.561442	1.93495	1.34944	-1.59166	-1.93704	-1.65054	-1.09395	-0.67403	-0.747783	-2.12445	-1.67165	-1.93206	-1.9641	-1.59482	-1.60849	-1.48101	-0.202812	-0.56042	0.655524	-0.952657	0.527555	0.672942
46	'Forced to have sex '	-0.625725	0.0646626	0.133214	0.270556	0.352941	-0.51679	0.443749	-0.435044	1.0033	1.8114	0.117386	0.403827	0.433608	1.1749	0	-0.374943	-0.360584	0.274256	-0.0899359	-0.0567032	-0.290051	0.28286	0.442659	1.00084	1.65056	1.06072	0.855472	1.8114	0.662621	-1.67792	-1.59745	-2.40054	-0.0388159	0.110154	0.691225	-1.47606	-1.30849	-1.741	-1.78676	-1.76307	-1.33931	-1.00544	0.169595	-0.493796	-0.114896	-1.57082	0.0324777	-0.0358332
47	'Physically injured by boyfriend/girlfriend*'	-0.0362683	0.293562	0.381455	0.307377	0.472492	-0.0473855	0.394814	-0.182778	1.32764	1.2755	0	0.0355168	0.106909	0.454749	-0.0497459	-0.227247	-0.350615	0.214835	-0.00535751	0.00474186	-0.160522	0.352993	0.338998	0.935949	1.27352	0.66918	0.698313	1.32764	0.42801	-1.37121	-1.53548	-1.79311	-0.354261	-0.0948881	0.24082	-1.3873	-1.12011	-1.40141	-1.38377	-1.37513	-1.12986	-0.987641	0.381804	-0.268439	0.125629	-0.878328	-0.22281	-0.219703
48	'Been in fight at school^'	0.697681	1.03471	1.04734	0.470976	1.06025	2.37075	2.37075	2.37075	-0.202128	-0.182191	-0.648883	-0.389938	-0.320736	0.305535	-0.283063	-0.302713	-0.236122	1.00757	0.0431886	0.0522677	0.0783136	1.21361	0.396753	1.1173	1.40615	0.96438	1.03346	1.45206	0.627873	-1.98881	-1.74364	-1.22729	-0.736835	-0.395066	-0.171655	-1.69794	-1.07299	-1.32586	-1.64551	-1.45764	-1.268	-1.53505	0.464364	-0.259095	0	-0.769062	-0.16329	-0.082103
49	'Injured in a fight*'	0.825607	1.03864	1.10645	0.948861	1.26525	1.9557	1.9557	1.71078	-0.284501	0.0366367	-0.837433	-0.629704	-0.521522	0.45209	-0.251556	-0.0488123	-0.174211	0.721447	-0.0159104	-0.0143925	-0.160265	0.915924	0.60586	1.23321	1.70314	1.0998	1.29509	1.9557	0.872462	-2.62705	-2.53455	-2.23199	-0.795224	-0.233937	0.1471	-2.27005	-1.78007	-2.33608	-2.42861	-2.52187	-1.88292	-1.93435	0.56021	-0.0647116	0.35844	-1.73216	0	0.0211405
50	'Been in fight^'	0.646601	1.09514	0.84702	0.0744551	0.95684	1.64635	1.64635	1.64635	-0.229399	-0.4266	-0.81618	-0.664413	-0.554989	-0.0255933	0.0266593	-0.102848	-0.130401	0.735321	0.0929715	0.0970766	0.147177	1.11055	0.467462	1.01809	1.08441	0.821304	0.838005	1.64635	0.575598	-2.09224	-2.0109	-1.37169	-0.898452	-0.722276	-0.526077	-2.09049	-1.60626	-1.54277	-1.87158	-1.72246	-1.49447	-1.75261	0.0326485	-0.39049	0.0291945	-0.900078	-0.158856	-0.0534608
51	'Been threatened at school^'	0.651478	1.02988	1.11971	1.33208	1.85881	0.794542	1.60026	0.735285	0.128181	0.280834	-0.347814	-0.268312	-0.0967182	0.604123	-0.165122	-0.417921	-0.360675	0.683333	-0.376048	-0.37245	-0.205759	0.73192	0.336087	1.22059	1.63221	1.00917	1.0952	1.85881	0.630967	-2.06481	-2.12102	-2.11821	-0.505172	-0.276034	0.0881675	-1.65708	-1.30538	-1.93049	-2.03693	-2.11841	-1.47906	-1.68111	0.49552	-0.421919	0.273744	-1.53507	-0.344493	-0.219637
52	'Felt unsafe at school*'	-0.0439822	0.510667	0.748766	1.54448	1.54448	0.124549	1.49626	0.358406	0.175457	0.41084	0.166158	0.0126589	0	0.872606	-0.752327	-0.57856	-0.660689	0.515436	-0.688047	-0.674028	-0.413222	0.780427	0.107868	1.07254	1.30457	0.803563	1.0099	1.45424	0.24074	-1.90657	-1.60907	-1.91758	0.0419522	0.0707718	0.212357	-1.58158	-1.40832	-1.82782	-1.76165	-1.79537	-1.17265	-1.30961	0.498055	-0.293808	-0.0853818	-1.37783	-0.446411	-0.424437
53	'Carried weapon at school'	1.82752	1.82752	1.82752	0.0777592	0.661091	0.226107	0.982836	0.263766	-0.421472	-0.397509	-1.41684	-0.826488	-0.593577	0.00392148	0.359883	0.0719586	-0.172356	0.898623	-0.290301	-0.277925	-0.200379	1.08275	0.33122	1.17408	1.5586	0.984602	1.03912	1.72353	0.552452	-2.25284	-2.43098	-2.469	-1.35672	-0.762873	-0.499255	-2.09048	-1.5958	-2.21555	-2.56123	-2.43531	-1.81304	-2.08417	0.596761	-0.443329	0.436669	-1.6057	-0.114952	0
54	'Carried a gun*'	2.11234	2.11234	2.11234	0.12447	0.856071	0.759037	1.19984	0.535945	-0.224554	-0.18125	-1.52715	-1.06023	-0.824464	-0.092819	0.014154	0.000321963	-0.0370134	1.01579	-0.318818	-0.311352	0.0456424	1.23188	0.569646	1.69043	1.87269	1.17053	1.4428	2.10345	0.765404	-2.27764	-2.55369	-2.06194	-1.27241	-0.54624	-0.258221	-2.14643	-1.48664	-2.08163	-2.38135	-2.25583	-1.49759	-1.92726	0.979025	-0.199128	0.82164	-1.36936	-0.275876	-0.0942339
55	'Carried a weapon '	1.88476	1.88476	1.88476	-0.110617	0.797235	0.63006	1.30637	0.518476	-0.234822	-0.552076	-1.19763	-0.879093	-0.661818	-0.37301	0.105013	0.0221645	0	0.78636	-0.105316	-0.0966798	0.0162014	1.16078	0.497173	1.32038	1.61426	1.00386	1.14907	1.88476	0.651609	-1.8138	-1.86044	-1.77752	-1.04799	-0.601943	-0.633625	-1.85893	-1.5086	-1.6624	-2.15543	-1.93177	-1.60251	-1.88456	0.586145	-0.332035	0.395704	-1.05289	-0.067945	0.111921
[truncated: 7 more columns]

## Sheet: 2007 Raw OR
Question #	Questions	Carried a weapon	Carried a gun*	Carried weapon at school	Felt unsafe at school*	Been threatened at school^	Been in fight^	Injured in a fight*	Been in fight at school^	Physically injured by boyfriend/girlfriend*	Forced to have sex	Has felt sad/hopeless *	Has considered suicide ^	Made a plan to commit suicide ^	Times attempted suicide *	Days had at least 1 drink of alcohol	Drank alcohol*	Had 5+ alcoholic drinks*	Drank alcohol at school*	Smoked marijuana	Age when first tried marijuana	Used marijuana*	Used marijuana at school*	Has ever used cocaine	Has used cocaine*	Has ever used heroin	Has ever used methamphetamines	Has ever used steroids	Has ever used injected drugs	Has ever used ecstasy	Does not go to PE class+	Has not participated in sports^	Watches TV	Has fasted to lose weight *	Has taken pill to lose weight *	Has vomited to lose weight*	No fruit juice+	No fruit+	No green salad+	No potatoes+	No carrots	No vegetables+	No milk+	Does not wear seatbelt	Ridden with drunk driver *	Has driven while drinking*	Does not wear sunscreen	Has ever smoked	Has smoked*
1	'Does not wear sunscreen'	1.70469	1.8161	1.98203	1.12038	1.31363	1.57144	1.68901	1.56145	1.70936	1.22257	1.24548	1.14762	1.1544	1.29034	1.08298	1.04533	1.08084	1.37786	1.66356	1.66459	1.57304	1.67333	1.40135	1.66773	1.22192	1.10521	1.10893	1.12972	1.41045	1.10042	1.46569	1.10851	1.19392	1.02559	0.995032	1.43703	1.96586	2.06718	1.54212	2.18916	2.16873	1.70493	3.04408	1.14753	1.10851	Inf	1.79335	1.43709
2	'No milk+'	0.825296	1.13615	0.998042	1.2964	1.22496	0.864066	1.19481	1.07843	1.52185	1.43281	1.333	1.29625	1.34043	1.42212	0.979582	0.968645	0.932554	1.10261	1.08104	1.09008	1.04282	1.12287	1.09338	1.26772	1.39264	1.21498	1.17417	2.20026	1.27741	1.35652	1.62083	0.69178	1.43428	1.39521	1.60841	1.98803	2.42312	1.56433	1.7068	1.94559	2.0619	Inf	2.09199	1.01118	1.00938	1.70493	1.19455	1.07532
3	'No vegetables+'	1.12159	1.35886	1.3566	1.3071	1.21798	1.16306	1.56738	1.24791	1.54919	1.16927	1.1388	1.11622	1.17193	1.53527	0.90674	0.849868	0.939647	1.231	1.10166	1.09813	1.1154	1.42574	1.14941	1.4549	1.7137	1.32445	1.53548	1.52452	1.1821	1.09251	1.61257	0.856727	1.12396	1.02712	1.18381	2.53149	4.6325	4.48683	3.11993	4.9168	Inf	2.0619	2.20953	1.11048	1.04581	2.16873	1.16032	1.07071
4	'No carrots'	0.976894	0.903595	0.922405	0.809699	0.915623	0.995188	0.829429	0.989694	1.13818	1.01293	1.07455	0.984064	0.866976	0.897439	1.09367	0.938768	0.862477	0.812966	1.15964	1.15575	1.08705	0.816161	0.919097	0.850378	0.507676	0.718756	0.752267	0.526283	0.84275	1.1946	1.49941	1.18146	0.921252	0.734282	0.680387	2.04353	3.65673	3.83906	2.52133	Inf	4.9168	1.94559	0.978479	0.962062	0.918563	2.18916	1.27487	1.00693
5	'No potatoes+'	0.764184	0.767286	0.79973	0.891133	0.959767	0.868606	0.904774	0.995191	1.12278	1.18944	1.12316	1.08539	1.06895	1.19312	0.871231	0.781849	0.73115	0.791579	0.898316	0.897858	0.839873	0.76199	0.882559	0.96173	0.914234	0.913197	0.692313	0.93392	0.789676	1.11821	1.40148	0.788967	1.06322	1.00304	1.28405	2.00936	2.4816	2.13258	Inf	2.52133	3.11993	1.7068	1.3469	0.853982	0.747659	1.54212	0.960469	0.834209
6	'No green salad+'	1.12833	1.19535	1.18036	0.883072	1.00134	1.03125	1.02096	1.03984	1.15824	0.944576	1.00266	0.978216	1.02657	1.08468	0.842831	0.758829	0.715895	0.986685	1.02838	1.0291	1.01287	1.12773	0.915834	0.970605	0.9457	0.836797	0.780087	1.00959	0.869526	1.11296	1.59601	1.08633	0.83774	0.622883	0.74789	2.16923	3.90416	Inf	2.13258	3.83906	4.48683	1.56433	1.3254	0.934132	0.83549	2.06718	1.08587	0.931881
7	'No fruit+'	1.04209	1.30764	1.30222	1.08509	1.22941	0.935866	1.36511	1.12602	1.24005	1.31145	1.20059	1.22555	1.28694	1.3668	0.87118	0.746987	0.7369	0.981155	1.08257	1.07271	0.98824	1.11708	1.1169	1.34667	1.62998	1.34256	1.37986	1.79677	1.16048	1.35232	1.98137	0.671755	1.22207	1.00969	1.14414	3.39435	Inf	3.90416	2.4816	3.65673	4.6325	2.42312	1.8223	0.981785	0.955185	1.96586	1.12066	1.17986
8	'No fruit juice+'	0.881245	0.97387	1.05869	1.0324	1.08145	0.797479	1.08911	0.901741	0.967636	1.11718	1.09651	1.21152	1.28464	1.29073	0.922151	0.798702	0.860814	0.906964	0.942952	0.941417	0.874229	1.04757	1.32309	1.44213	1.56509	1.39799	1.32632	1.66619	1.10836	1.3006	1.59079	0.719318	1.09578	1.15927	1.36805	Inf	3.39435	2.16923	2.00936	2.04353	2.53149	1.98803	1.76457	0.899799	0.92812	1.43703	1.12105	1.04189
9	'Has vomited to lose weight*'	1.8042	2.4604	2.54018	3.53677	3.11562	1.95762	3.86677	2.24389	3.10314	5.12322	4.14063	5.30595	5.08232	6.98816	3.03307	2.7581	2.79817	4.2123	2.40553	2.40082	2.40664	4.12594	5.66212	7.67739	11.3339	6.43792	8.05545	12.2134	5.5817	0.9887	0.983753	0.613427	15.9703	17.8061	Inf	1.36805	1.14414	0.74789	1.28405	0.680387	1.18381	1.60841	3.63945	1.85084	2.33177	0.995032	3.48375	2.96745
10	'Has taken pill to lose weight *'	1.66466	2.34534	2.26044	3.06107	2.61249	2.01089	3.80885	1.96528	2.22901	3.41367	2.76282	3.58491	3.39777	4.51914	2.88298	2.80008	2.83931	3.56774	2.08888	2.09694	2.27778	2.97742	4.15897	5.16936	7.40038	5.68784	6.82079	11.1513	4.77694	0.968519	1.03724	0.774091	8.19226	Inf	17.8061	1.15927	1.00969	0.622883	1.00304	0.734282	1.02712	1.39521	4.10856	2.06368	2.74016	1.02559	3.17138	2.99737
11	'Has fasted to lose weight *'	1.50002	1.53326	2.06824	2.89892	2.37649	1.83935	2.5748	1.93692	2.09313	3.37902	4.08227	4.18931	4.09757	5.83732	1.966	2.04798	2.109	2.75979	1.77654	1.80492	1.85193	2.45152	2.96421	4.21446	5.48026	3.63242	3.95226	5.21659	3.11995	1.04385	1.29642	0.770855	Inf	8.19226	15.9703	1.09578	1.22207	0.83774	1.06322	0.921252	1.12396	1.43428	3.04026	1.70533	2.04325	1.19392	2.28411	2.36318
12	'Watches TV'	0.967707	0.821566	0.766865	0.873124	0.989515	1.27862	1.09549	1.25225	0.908534	0.720924	0.96756	0.825954	0.827893	0.777905	1.53215	1.14637	0.99732	1.33927	1.16561	1.17521	1.15139	1.11966	0.805423	0.90727	0.709303	0.721626	0.794351	0.646141	0.915902	0.692599	0.895747	Inf	0.770855	0.774091	0.613427	0.719318	0.671755	1.08633	0.788967	1.18146	0.856727	0.69178	0.625352	1.1453	1.23672	1.10851	1.23664	1.03696
13	'Has not participated in sports^'	0.887264	0.796834	0.985841	1.19532	0.799611	0.84547	0.873779	0.759325	1.00172	1.25326	1.51231	1.33872	1.25703	1.36679	0.972571	0.871214	0.838425	0.946075	1.12912	1.12849	1.12311	0.912171	1.39359	1.2977	1.00863	1.19006	0.8134	0.854058	1.29291	1.95615	Inf	0.895747	1.29642	1.03724	0.983753	1.59079	1.98137	1.59601	1.40148	1.49941	1.61257	1.62083	1.22815	1.0015	0.779057	1.46569	1.33468	1.41111
14	'Does not go to PE class+'	0.904151	0.857453	0.789157	0.780689	0.802206	0.773521	0.634761	0.692984	1.08341	1.22603	1.15918	1.16567	1.17677	1.06924	1.17145	1.06514	1.12916	0.936301	1.16739	1.16187	1.12023	0.880128	1.25092	1.0645	0.851642	1.13331	0.798696	0.799673	1.10554	Inf	1.95615	0.692599	1.04385	0.968519	0.9887	1.3006	1.35232	1.11296	1.11821	1.1946	1.09251	1.35652	0.846053	0.950903	1.19585	1.10042	1.23312	1.33319
15	'Offered drugs at school ^'	2.7079	2.84548	3.75297	2.08414	3.17267	2.74829	3.00259	2.66167	2.43751	2.4122	2.01866	2.34923	2.66172	2.65708	3.26025	2.72652	2.5636	5.17422	3.36689	3.35142	3.66873	10.3081	5.12715	6.43943	5.52371	5.7166	3.93511	5.07675	4.72545	0.935867	1.05961	1.09381	1.85004	2.24267	2.59821	0.985703	0.969518	0.993786	0.952127	0.890807	1.06863	0.976989	2.34037	2.27486	2.7621	1.3571	3.19561	2.9846
16	'Has ever used ecstasy'	5.07052	7.76623	6.59529	3.48067	5.0366	4.84919	7.29221	3.6924	4.61074	5.25912	2.56791	3.41035	4.09818	5.38111	35.4215	9.99175	8.73828	9.49399	21.8344	22.0674	10.9561	11.9415	29.9173	35.2102	63.4191	31.367	17.1877	39.2254	Inf	1.10554	1.29291	0.915902	3.11995	4.77694	5.5817	1.10836	1.16048	0.869526	0.789676	0.84275	1.1821	1.27741	5.27887	4.90747	7.23114	1.41045	20.9291	11.209
17	'Has ever used injected drugs'	8.17895	11.0714	13.1279	8.75848	9.76034	9.04511	21.0366	9.31909	5.23984	7.99028	4.78984	5.21088	8.6695	9.75136	13.6187	6.09314	5.46261	12.969	5.62481	5.6117	6.21699	15.9491	26.5554	37.9486	143.618	46.6199	52.8002	Inf	39.2254	0.799673	0.854058	0.646141	5.21659	11.1513	12.2134	1.66619	1.79677	1.00959	0.93392	0.526283	1.52452	2.20026	20.3336	3.60599	7.07753	1.12972	18.328	9.70168
18	'Has ever used steroids'	4.90778	7.89916	6.51768	5.67126	7.00876	4.53111	9.01219	4.30463	4.15234	5.30557	2.86784	3.92988	4.59291	7.10131	6.99533	5.90383	5.46997	8.04893	5.23809	5.22836	6.22421	11.4212	12.6247	20.3299	59.2668	20.3231	Inf	52.8002	17.1877	0.798696	0.8134	0.794351	3.95226	6.82079	8.05545	1.32632	1.37986	0.780087	0.692313	0.752267	1.53548	1.17417	7.18994	3.64111	6.22107	1.10893	5.7317	5.60846
19	'Has ever used methamphetamines'	4.1358	6.07086	7.44341	4.30373	5.77208	4.48704	7.76114	4.05949	4.81877	5.55078	3.09026	3.91868	4.61283	5.86257	17.3887	8.42879	7.4868	10.2309	18.1946	18.3064	9.12953	13.7119	43.962	38.3545	92.1035	Inf	20.3231	46.6199	31.367	1.13331	1.19006	0.721626	3.63242	5.68784	6.43792	1.39799	1.34256	0.836797	0.913197	0.718756	1.32445	1.21498	5.99317	4.65102	6.23076	1.10521	18.1639	10.5424
20	'Has ever used heroin'	7.66959	12.8779	11.5794	7.80057	9.80001	7.20751	14.8871	6.99604	6.39878	9.33308	3.59544	4.9969	6.14399	9.52836	42.2031	13.4183	8.98301	16.2179	12.0886	12.6183	10.7799	23.3845	73.2198	79.7944	Inf	92.1035	59.2668	143.618	63.4191	0.851642	1.00863	0.709303	5.48026	7.40038	11.3339	1.56509	1.62998	0.9457	0.914234	0.507676	1.7137	1.39264	11.3386	5.61021	8.46884	1.22192	13.7421	12.2354
21	'Has used cocaine*'	5.88669	8.70841	8.14602	4.45746	5.95523	5.4726	8.2348	4.3874	4.45223	4.93949	3.17264	4.00067	4.35854	6.91254	23.3452	32.0219	19.2687	11.6555	19.2115	19.411	22.4455	17.5491	Inf	Inf	79.7944	38.3545	20.3299	37.9486	35.2102	1.0645	1.2977	0.90727	4.21446	5.16936	7.67739	1.44213	1.34667	0.970605	0.96173	0.850378	1.4549	1.26772	6.23731	7.66555	10.4123	1.66773	21.1971	18.9965
22	'Has ever used cocaine '	3.47067	5.05775	4.58952	2.68734	3.97412	3.85757	5.54175	2.99644	3.61447	3.56902	2.57574	2.97504	3.493	4.44879	27.218	10.908	8.98642	7.42025	19.6628	19.6835	9.46065	10.3122	Inf	Inf	73.2198	43.962	12.6247	26.5554	29.9173	1.25092	1.39359	0.805423	2.96421	4.15897	5.66212	1.32309	1.1169	0.915834	0.882559	0.919097	1.14941	1.09338	4.11731	4.82456	6.89329	1.40135	16.7844	11.2453
23	'Used marijuana at school*'	5.91552	8.02237	9.46971	4.21379	4.93799	5.02006	6.56977	5.02616	3.57616	3.6201	2.02661	2.5739	3.24509	4.87286	10.9184	11.4479	7.85895	17.9011	Inf	Inf	Inf	Inf	10.3122	17.5491	23.3845	13.7119	11.4212	15.9491	11.9415	0.880128	0.912171	1.11966	2.45152	2.97742	4.12594	1.04757	1.11708	1.12773	0.76199	0.816161	1.42574	1.12287	4.8378	4.79624	7.21867	1.67333	11.3365	9.02772
24	'Used marijuana*'	3.18899	4.0514	4.05505	1.96499	2.38586	3.29769	3.65505	2.70244	2.70062	2.39585	1.77026	2.06342	2.10457	2.81827	13.586	11.6953	8.03339	6.93356	Inf	Inf	Inf	Inf	9.46065	22.4455	10.7799	9.12953	6.22421	6.21699	10.9561	1.12023	1.12311	1.15139	1.85193	2.27778	2.40664	0.874229	0.98824	1.01287	0.839873	1.08705	1.1154	1.04282	2.43588	4.16444	6.28433	1.57304	10.2579	12.1593
25	'Age when first tried marijuana'	2.95196	3.32842	3.59954	1.67992	2.2306	2.9958	3.43398	2.44831	2.98759	2.74725	1.84116	2.11488	2.08026	2.71122	13.7671	7.22919	7.5613	7.01018	Inf	Inf	Inf	Inf	19.6835	19.411	12.6183	18.3064	5.22836	5.6117	22.0674	1.16187	1.12849	1.17521	1.80492	2.09694	2.40082	0.941417	1.07271	1.0291	0.897858	1.15575	1.09813	1.09008	1.93469	3.53857	7.14045	1.66459	13.4904	14.0672
26	'Smoked marijuana'	2.9553	3.3421	3.64016	1.67334	2.21799	3.00593	3.42948	2.42973	2.97131	2.76041	1.83601	2.09578	2.07375	2.67188	14.0665	7.21108	7.53654	6.92836	Inf	Inf	Inf	Inf	19.6628	19.2115	12.0886	18.1946	5.23809	5.62481	21.8344	1.16739	1.12912	1.16561	1.77654	2.08888	2.40553	0.942952	1.08257	1.02838	0.898316	1.15964	1.10166	1.08104	1.8909	3.52503	7.08077	1.66356	13.5712	14.1434
27	'Has driven while drinking*'	3.55381	6.18666	5.2249	2.54316	3.08548	3.07563	4.33474	2.42725	2.72462	2.81645	1.51787	2.05245	2.09879	2.6396	Inf	Inf	19.8416	8.18865	7.08077	7.14045	6.28433	7.21867	6.89329	10.4123	8.46884	6.23076	6.22107	7.07753	7.23114	1.19585	0.779057	1.23672	2.04325	2.74016	2.33177	0.92812	0.955185	0.83549	0.747659	0.918563	1.04581	1.00938	3.95778	11.0559	Inf	1.10851	6.0993	7.97572
28	'Ridden with drunk driver *'	2.4261	3.58475	3.15064	2.26636	2.48211	2.40463	3.17497	2.07331	2.47676	2.03288	1.5942	1.74757	1.68763	2.23849	5.17302	6.36631	5.76255	4.98692	3.52503	3.53857	4.16444	4.79624	4.82456	7.66555	5.61021	4.65102	3.64111	3.60599	4.90747	0.950903	1.0015	1.1453	1.70533	2.06368	1.85084	0.899799	0.981785	0.934132	0.853982	0.962062	1.11048	1.01118	2.16136	Inf	11.0559	1.14753	3.20511	4.31698
29	'Does not wear seatbelt'	3.89508	6.27457	5.48416	4.2008	3.57033	3.37189	5.91891	4.14162	3.37979	3.54755	1.9392	2.36937	3.29559	3.04879	1.6173	1.93722	2.02956	3.7106	1.8909	1.93469	2.43588	4.8378	4.11731	6.23731	11.3386	5.99317	7.18994	20.3336	5.27887	0.846053	1.22815	0.625352	3.04026	4.10856	3.63945	1.76457	1.8223	1.3254	1.3469	0.978479	2.20953	2.09199	Inf	2.16136	3.95778	3.04408	3.37613	3.63803
30	'Drank alcohol at school*'	4.80951	6.43641	8.04143	3.50398	4.70109	3.9014	6.49708	3.92492	2.97442	3.98335	2.21514	2.60052	3.03502	4.60806	Inf	Inf	12.0803	Inf	6.92836	7.01018	6.93356	17.9011	7.42025	11.6555	16.2179	10.2309	8.04893	12.969	9.49399	0.936301	0.946075	1.33927	2.75979	3.56774	4.2123	0.906964	0.981155	0.986685	0.791579	0.812966	1.231	1.10261	3.7106	4.98692	8.18865	1.37786	6.21144	5.77334
31	'Had 5+ alcoholic drinks*'	2.65284	3.26783	3.36686	1.8806	2.04582	2.66919	3.67149	1.96215	2.14078	2.22531	1.71511	2.05169	1.89983	2.59678	Inf	Inf	Inf	12.0803	7.53654	7.5613	8.03339	7.85895	8.98642	19.2687	8.98301	7.4868	5.46997	5.46261	8.73828	1.12916	0.838425	0.99732	2.109	2.83931	2.79817	0.860814	0.7369	0.715895	0.73115	0.862477	0.939647	0.932554	2.02956	5.76255	19.8416	1.08084	5.70101	9.31115
32	'Drank alcohol*'	2.92472	3.4257	3.64169	1.77746	2.09204	2.93515	4.35535	2.22991	2.45152	2.22525	1.84842	2.2658	2.1004	2.75128	Inf	Inf	Inf	Inf	7.21108	7.22919	11.6953	11.4479	10.908	32.0219	13.4183	8.42879	5.90383	6.09314	9.99175	1.06514	0.871214	1.14637	2.04798	2.80008	2.7581	0.798702	0.746987	0.758829	0.781849	0.938768	0.849868	0.968645	1.93722	6.36631	Inf	1.04533	5.22856	12.991
33	'Days had at least 1 drink of alcohol'	3.07057	3.60745	3.90273	1.6477	2.12214	3.0985	3.06532	2.37736	2.64993	2.78779	2.14809	2.54835	2.61916	3.22875	Inf	Inf	Inf	Inf	14.0665	13.7671	13.586	10.9184	27.218	23.3452	42.2031	17.3887	6.99533	13.6187	35.4215	1.17145	0.972571	1.53215	1.966	2.88298	3.03307	0.922151	0.87118	0.842831	0.871231	1.09367	0.90674	0.979582	1.6173	5.17302	Inf	1.08298	8.70199	14.1784
34	'Smoked cigars*'	4.52319	5.56311	5.10423	2.20728	3.06371	3.58321	4.55974	3.15001	2.95398	2.80548	1.57857	2.08832	2.49606	2.91199	17.3849	12.9557	8.45188	5.87705	10.7985	10.8769	9.44599	9.17204	6.88829	10.8691	12.123	8.10982	7.10701	11.4598	8.16169	1.17722	0.999038	1.26096	1.84942	2.7897	2.78764	0.882912	1.11817	0.971356	0.784183	0.906844	1.10498	0.966099	4.10819	4.1625	7.88458	1.36714	15.9028	19.8879
35	'Has used snuff at school*'	9.28578	10.0468	9.17037	2.97413	3.49693	3.6219	4.9698	4.11557	2.83988	2.74393	1.09422	1.72391	2.17309	2.87957	10.5323	8.00571	8.88345	7.73896	4.91052	4.93842	4.34607	6.74697	6.60859	10.9471	16.6875	8.23956	11.6286	19.4308	8.05999	0.84782	0.721072	1.15309	2.02703	2.82739	3.92757	1.10697	1.21336	0.967331	0.626215	0.811776	1.22541	0.834367	9.50586	3.46332	7.38511	1.4112	9.92079	8.64796
36	'Used snuff*'	7.21898	7.37817	6.49608	2.48832	2.75745	3.38213	4.11669	3.15106	2.45956	2.28271	1.05261	1.57493	1.85381	2.30144	12.1463	7.1848	7.12846	5.09164	4.56207	4.59738	3.77922	5.16798	5.89344	8.62436	14.3289	6.62061	9.58865	16.2236	6.72491	0.866398	0.674804	1.22775	1.72357	2.47436	3.23267	1.02786	1.05799	0.885629	0.565935	0.759417	0.998465	0.741046	6.12241	3.16639	6.36603	1.33515	9.7638	8.33845
37	'Has ever smoked cigarettes daily'	3.08537	3.72	3.67071	2.0952	2.32362	2.88649	3.5936	2.53917	3.25662	3.82926	2.21093	2.79345	3.1222	3.51059	11.0428	7.10416	5.99047	4.14505	14.474	14.3502	8.11339	6.24921	9.72776	9.60974	9.53882	9.36518	6.20702	9.91647	9.28431	1.41016	1.77006	0.921442	2.30327	3.08795	3.34805	1.19532	1.38034	1.00832	0.870625	1.13076	1.13105	1.15882	4.9125	3.06779	5.45661	1.48571	Inf	46.0856
38	'Smoked cigarettes at school*'	5.34627	5.94208	7.50993	2.95656	4.34366	4.45663	5.72215	4.33561	4.22466	3.62346	2.41124	3.27366	3.90535	5.01641	18.2689	14.2921	9.65135	10.6158	25.8578	25.9232	15.3672	20.5226	9.8708	14.1241	16.6274	10.7949	9.01862	12.9805	12.6552	1.11811	1.3648	1.0335	2.3581	2.67277	3.50809	1.16325	1.30413	1.13581	0.830207	1.08666	1.46159	1.05002	5.27894	4.9347	8.1858	1.5605	Inf	Inf
39	'Has smoked*'	3.21766	3.75388	3.79628	1.77179	2.32752	3.00369	3.85563	2.34251	2.79925	2.78162	1.9756	2.59133	2.84297	3.40655	14.1784	12.991	9.31115	5.77334	14.1434	14.0672	12.1593	9.02772	11.2453	18.9965	12.2354	10.5424	5.60846	9.70168	11.209	1.33319	1.41111	1.03696	2.36318	2.99737	2.96745	1.04189	1.17986	0.931881	0.834209	1.00693	1.07071	1.07532	3.63803	4.31698	7.97572	1.43709	Inf	Inf
40	'Has ever smoked'	2.81004	3.06866	3.36932	1.96708	2.20338	2.64368	3.34889	2.46195	2.6257	3.2526	2.08043	2.25892	2.5658	3.0117	8.70199	5.22856	5.70101	6.21144	13.5712	13.4904	10.2579	11.3365	16.7844	21.1971	13.7421	18.1639	5.7317	18.328	20.9291	1.23312	1.33468	1.23664	2.28411	3.17138	3.48375	1.12105	1.12066	1.08587	0.960469	1.27487	1.16032	1.19455	3.37613	3.20511	6.0993	1.79335	Inf	Inf
41	'Times attempted suicide *'	2.38587	2.87744	4.09844	5.07691	4.10212	2.8829	5.80207	3.31721	3.60668	6.47716	8.66982	72.4579	29.2932	Inf	3.22875	2.75128	2.59678	4.60806	2.67188	2.71122	2.81827	4.87286	4.44879	6.91254	9.52836	5.86257	7.10131	9.75136	5.38111	1.06924	1.36679	0.777905	5.83732	4.51914	6.98816	1.29073	1.3668	1.08468	1.19312	0.897439	1.53527	1.42212	3.04879	2.23849	2.6396	1.29034	3.0117	3.40655
42	'Made a plan to commit suicide ^'	2.17777	2.16096	3.09405	3.10496	3.3264	2.3368	3.90288	2.58442	3.36596	4.73926	7.58879	35.6491	Inf	29.2932	2.61916	2.1004	1.89983	3.03502	2.07375	2.08026	2.10457	3.24509	3.493	4.35854	6.14399	4.61283	4.59291	8.6695	4.09818	1.17677	1.25703	0.827893	4.09757	3.39777	5.08232	1.28464	1.28694	1.02657	1.06895	0.866976	1.17193	1.34043	3.29559	1.68763	2.09879	1.1544	2.5658	2.84297
43	'Has considered suicide ^'	1.81937	1.70175	2.55116	2.89722	2.7415	2.13911	3.07359	2.09653	2.82962	4.1754	8.57733	Inf	35.6491	72.4579	2.54835	2.2658	2.05169	2.60052	2.09578	2.11488	2.06342	2.5739	2.97504	4.00067	4.9969	3.91868	3.92988	5.21088	3.41035	1.16567	1.33872	0.825954	4.18931	3.58491	5.30595	1.21152	1.22555	0.978216	1.08539	0.984064	1.11622	1.29625	2.36937	1.74757	2.05245	1.14762	2.25892	2.59133
44	'Has felt sad/hopeless *'	1.45994	1.22866	2.12559	3.64071	2.65681	1.83784	3.02765	1.80755	2.79932	4.06133	Inf	8.57733	7.58879	8.66982	2.14809	1.84842	1.71511	2.21514	1.83601	1.84116	1.77026	2.02661	2.57574	3.17264	3.59544	3.09026	2.86784	4.78984	2.56791	1.15918	1.51231	0.96756	4.08227	2.76282	4.14063	1.09651	1.20059	1.00266	1.12316	1.07455	1.1388	1.333	1.9392	1.5942	1.51787	1.24548	2.08043	1.9756
45	'Ever had sex '	2.52583	3.84739	3.32406	1.96842	2.3845	2.98581	4.56688	2.84048	5.60465	9.05908	1.90629	1.9422	1.9341	2.8166	4.52462	3.76676	3.89713	3.71198	6.56187	6.54021	5.50868	7.47122	6.30411	8.95052	14.5514	7.06215	7.46988	11.6905	12.2261	1.20503	0.95343	1.21381	1.74489	2.31607	2.18218	0.885148	1.15425	1.1661	1.05863	1.41013	1.35071	1.27194	2.4819	2.71201	5.68476	1.99446	4.74744	5.15597
46	'Forced to have sex '	2.36538	3.27022	4.22054	3.75833	4.39369	2.37954	4.72953	2.82437	6.62255	Inf	4.06133	4.1754	4.73926	6.47716	2.78779	2.22525	2.22531	3.98335	2.76041	2.74725	2.39585	3.6201	3.56902	4.93949	9.33308	5.55078	5.30557	7.99028	5.25912	1.22603	1.25326	0.720924	3.37902	3.41367	5.12322	1.11718	1.31145	0.944576	1.18944	1.01293	1.16927	1.43281	3.54755	2.03288	2.81645	1.22257	3.2526	2.78162
47	'Physically injured by boyfriend/girlfriend*'	2.51905	3.37574	3.47138	3.00392	4.08506	3.01687	4.2662	2.75294	Inf	6.62255	2.79932	2.82962	3.36596	3.60668	2.64993	2.45152	2.14078	2.97442	2.97131	2.98759	2.70062	3.57616	3.61447	4.45223	6.39878	4.81877	4.15234	5.23984	4.61074	1.08341	1.00172	0.908534	2.09313	2.22901	3.10314	0.967636	1.24005	1.15824	1.12278	1.13818	1.54919	1.52185	3.37979	2.47676	2.72462	1.70936	2.6257	2.79925
48	'Been in fight at school^'	4.2821	5.12228	5.19377	3.6548	5.61786	Inf	12.8575	Inf	2.75294	2.82437	1.80755	2.09653	2.58442	3.31721	2.37736	2.22991	1.96215	3.92492	2.42973	2.44831	2.70244	5.02616	2.99644	4.3874	6.99604	4.05949	4.30463	9.31909	3.6924	0.692984	0.759325	1.25225	1.93692	1.96528	2.24389	0.901741	1.12602	1.03984	0.995191	0.989694	1.24791	1.07843	4.14162	2.07331	2.42725	1.56145	2.46195	2.34251
49	'Injured in a fight*'	5.74227	7.79306	7.07832	6.2636	9.04929	Inf	Inf	12.8575	4.2662	4.72953	3.02765	3.07359	3.90288	5.80207	3.06532	4.35535	3.67149	6.49708	3.42948	3.43398	3.65505	6.56977	5.54175	8.2348	14.8871	7.76114	9.01219	21.0366	7.29221	0.634761	0.873779	1.09549	2.5748	3.80885	3.86677	1.08911	1.36511	1.02096	0.904774	0.829429	1.56738	1.19481	5.91891	3.17497	4.33474	1.68901	3.34889	3.85563
50	'Been in fight^'	5.43437	6.75236	5.5066	3.16465	5.75495	Inf	Inf	Inf	3.01687	2.37954	1.83784	2.13911	2.3368	2.8829	3.0985	2.93515	2.66919	3.9014	3.00593	2.9958	3.29769	5.02006	3.85757	5.4726	7.20751	4.48704	4.53111	9.04511	4.84919	0.773521	0.84547	1.27862	1.83935	2.01089	1.95762	0.797479	0.935866	1.03125	0.868606	0.995188	1.16306	0.864066	3.37189	2.40463	3.07563	1.57144	2.64368	3.00369
51	'Been threatened at school^'	4.79841	6.22129	6.28657	7.27813	Inf	5.75495	9.04929	5.61786	4.08506	4.39369	2.65681	2.7415	3.3264	4.10212	2.12214	2.09204	2.04582	4.70109	2.21799	2.2306	2.38586	4.93799	3.97412	5.95523	9.80001	5.77208	7.00876	9.76034	5.0366	0.802206	0.799611	0.989515	2.37649	2.61249	3.11562	1.08145	1.22941	1.00134	0.959767	0.915623	1.21798	1.22496	3.57033	2.48211	3.08548	1.31363	2.20338	2.32752
52	'Felt unsafe at school*'	2.39156	3.67693	4.10336	Inf	7.27813	3.16465	6.2636	3.6548	3.00392	3.75833	3.64071	2.89722	3.10496	5.07691	1.6477	1.77746	1.8806	3.50398	1.67334	1.67992	1.96499	4.21379	2.68734	4.45746	7.80057	4.30373	5.67126	8.75848	3.48067	0.780689	1.19532	0.873124	2.89892	3.06107	3.53677	1.0324	1.08509	0.883072	0.891133	0.809699	1.3071	1.2964	4.2008	2.26636	2.54316	1.12038	1.96708	1.77179
53	'Carried weapon at school'	Inf	15.6703	Inf	4.10336	6.28657	5.5066	7.07832	5.19377	3.47138	4.22054	2.12559	2.55116	3.09405	4.09844	3.90273	3.64169	3.36686	8.04143	3.64016	3.59954	4.05505	9.46971	4.58952	8.14602	11.5794	7.44341	6.51768	13.1279	6.59529	0.789157	0.985841	0.766865	2.06824	2.26044	2.54018	1.05869	1.30222	1.18036	0.79973	0.922405	1.3566	0.998042	5.48416	3.15064	5.2249	1.98203	3.36932	3.79628
54	'Carried a gun*'	Inf	Inf	15.6703	3.67693	6.22129	6.75236	7.79306	5.12228	3.37574	3.27022	1.22866	1.70175	2.16096	2.87744	3.60745	3.4257	3.26783	6.43641	3.3421	3.32842	4.0514	8.02237	5.05775	8.70841	12.8779	6.07086	7.89916	11.0714	7.76623	0.857453	0.796834	0.821566	1.53326	2.34534	2.4604	0.97387	1.30764	1.19535	0.767286	0.903595	1.35886	1.13615	6.27457	3.58475	6.18666	1.8161	3.06866	3.75388
55	'Carried a weapon '	Inf	Inf	Inf	2.39156	4.79841	5.43437	5.74227	4.2821	2.51905	2.36538	1.45994	1.81937	2.17777	2.38587	3.07057	2.92472	2.65284	4.80951	2.9553	2.95196	3.18899	5.91552	3.47067	5.88669	7.66959	4.1358	4.90778	8.17895	5.07052	0.904151	0.887264	0.967707	1.50002	1.66466	1.8042	0.881245	1.04209	1.12833	0.764184	0.976894	1.12159	0.825296	3.89508	2.4261	3.55381	1.70469	2.81004	3.21766
[truncated: 7 more columns]

## Sheet: 2007 Normalized OR
Question #	Questions	Carried a weapon	Carried a gun*	Carried weapon at school	Felt unsafe at school*	Been threatened at school^	Been in fight^	Injured in a fight*	Been in fight at school^	Physically injured by boyfriend/girlfriend*	Forced to have sex	Has felt sad/hopeless *	Has considered suicide ^	Made a plan to commit suicide ^	Times attempted suicide *	Days had at least 1 drink of alcohol	Drank alcohol*	Had 5+ alcoholic drinks*	Drank alcohol at school*	Smoked marijuana	Age when first tried marijuana	Used marijuana*	Used marijuana at school*	Has ever used cocaine	Has used cocaine*	Has ever used heroin	Has ever used methamphetamines	Has ever used steroids	Has ever used injected drugs	Has ever used ecstasy	Does not go to PE class+	Has not participated in sports^	Watches TV	Has fasted to lose weight *	Has taken pill to lose weight *	Has vomited to lose weight*	No fruit juice+	No fruit+	No green salad+	No potatoes+	No carrots	No vegetables+	No milk+	Does not wear seatbelt	Ridden with drunk driver *	Has driven while drinking*	Does not wear sunscreen	Has ever smoked	Has smoked*
1	'Does not wear sunscreen'	0.272582	0.363923	0.490057	-0.332939	-0.103363	0.155162	0.259259	0.145964	0.276534	-0.207006	-0.180224	-0.298276	-0.289785	-0.129172	-0.381921	-0.432969	-0.384766	-0.0344958	0.237353	0.238244	0.156632	0.245803	-0.0101041	0.240966	-0.207777	-0.352596	-0.347751	-0.320953	-0.000767157	-0.358871	0.0546608	-0.348298	-0.241213	-0.460466	-0.504108	0.0261643	0.478234	0.550741	0.127996	0.633456	0.619929	0.272792	1.10908	-0.298387	-0.348296	1.10908	0.345733	0.026223
2	'No milk+'	-0.557953	-0.096784	-0.283763	0.0935728	0.0117946	-0.491723	-0.0241499	-0.172001	0.324887	0.237916	0.133742	0.0934059	0.141764	0.227105	-0.310698	-0.326895	-0.381677	-0.140013	-0.168514	-0.1565	-0.220451	-0.113747	-0.152139	0.0612979	0.196885	0	-0.0492981	0.856735	0.0722804	0.158972	0.415796	-0.81255	0.239394	0.199542	0.404698	0.710407	0.995928	0.364609	0.490358	0.679271	0.763039	0.995928	0.783937	-0.264899	-0.267469	0.48878	-0.0244637	-0.176173
3	'No vegetables+'	-0.118951	0.157906	0.155503	0.101873	0	-0.0665641	0.363865	0.0350189	0.347017	-0.0588906	-0.0969727	-0.125865	-0.0556107	0.334003	-0.425733	-0.519183	-0.374302	0.0153348	-0.14482	-0.149444	-0.126931	0.227215	-0.0836026	0.256424	0.492623	0.120898	0.334193	0.323863	-0.0431395	-0.156845	0.40487	-0.507586	-0.115906	-0.245885	-0.0410508	1.0555	1.9273	1.8812	1.35702	2.01323	2.01323	0.759481	0.859249	-0.133311	-0.219866	0.832359	-0.0699653	-0.18593
4	'No carrots'	0	-0.112527	-0.0828031	-0.270817	-0.0934496	0.0267661	-0.236084	0.0187804	0.22045	0.0522589	0.137464	0.01055	-0.172211	-0.122388	0.162899	-0.0574346	-0.179717	-0.265007	0.247401	0.24255	0.154142	-0.259349	-0.0879857	-0.200099	-0.944295	-0.442701	-0.376959	-0.892364	-0.213097	0.290249	0.618116	0.274302	-0.0846066	-0.411869	-0.521848	1.06479	1.90428	1.97448	1.36791	2.33144	2.33144	0.993932	0.00233754	-0.0220732	-0.0888243	1.1641	0.384072	0.0436827
5	'No potatoes+'	-0.258643	-0.2528	-0.19305	-0.0369225	0.0701213	-0.0738611	-0.015006	0.12241	0.296442	0.379642	0.296931	0.247579	0.225562	0.384103	-0.0695082	-0.225673	-0.322397	-0.207831	-0.0253408	-0.0260763	-0.122392	-0.262791	-0.0508711	0.0730683	0	-0.00163743	-0.40114	0.0307352	-0.211303	0.290561	0.616319	-0.212599	0.217808	0.133739	0.490061	1.1361	1.44063	1.22197	1.77088	1.46355	1.77088	0.900658	0.559011	-0.0983577	-0.290183	0.754284	0.071175	-0.132155
6	'No green salad+'	0.155742	0.238988	0.220777	-0.197847	-0.016518	0.0259497	0.0114802	0.0379054	0.193487	-0.100712	-0.0146128	-0.0502253	0.0193844	0.0988178	-0.265136	-0.416605	-0.500631	-0.0377891	0.0219225	0.0229335	0	0.154968	-0.145292	-0.061494	-0.0989971	-0.275501	-0.376745	-0.00467935	-0.220149	0.13595	0.65602	0.101015	-0.273877	-0.701417	-0.437554	1.09873	1.94656	2.14724	1.07415	1.9223	2.14724	0.627093	0.387973	-0.116753	-0.277756	1.02921	0.100406	-0.120233
7	'No fruit+'	-0.229844	0.0976379	0.0916437	-0.171504	0.00864721	-0.384949	0.159692	-0.118095	0.0210789	0.101843	-0.025579	0.00410629	0.0746253	0.161473	-0.488281	-0.710168	-0.729784	-0.316771	-0.174862	-0.188066	-0.306391	-0.129594	-0.129821	0.140071	0.415527	0.135661	0.175203	0.556078	-0.0745965	0.14611	0.697177	-0.863317	0	-0.275414	-0.0950603	1.47381	1.92247	1.67569	1.02195	1.58123	1.92247	0.98754	0.576438	-0.315845	-0.355472	0.685833	-0.124972	-0.050711
8	'No fruit juice+'	-0.329007	-0.184821	-0.0643402	-0.100621	-0.0336594	-0.473103	-0.023472	-0.295837	-0.194085	0.0132431	-0.0137034	0.130201	0.214742	0.221568	-0.263547	-0.470893	-0.362848	-0.287505	-0.231365	-0.233716	-0.340539	-0.0795692	0.257284	0.38158	0.499625	0.33673	0.260804	0.589931	0.00179844	0.232555	0.523121	-0.621921	-0.0146608	0.0665943	0.305504	1.61651	1.61651	0.970559	0.860112	0.884441	1.19337	0.844721	0.672695	-0.298947	-0.254238	0.376465	0.01823	-0.0874163
9	'Has vomited to lose weight*'	-0.749422	-0.301885	-0.255846	0.221656	0.0387406	-0.631676	0.350351	-0.434777	0.0329509	0.756275	0.449072	0.806834	0.744709	1.20413	0	-0.137103	-0.116291	0.473832	-0.334422	-0.337252	-0.333758	0.443946	0.900566	1.33984	1.9018	1.08582	1.40919	2.00962	0.879928	-1.61717	-1.62441	-2.30581	2.39654	2.55352	2.55352	-1.14865	-1.40651	-2.01988	-1.24008	-2.15635	-1.35734	-0.915143	0.262942	-0.712597	-0.379354	-1.60796	0.199865	-0.0315539
10	'Has taken pill to lose weight *'	-0.730911	-0.236346	-0.289536	0.147893	-0.0807171	-0.458308	0.463214	-0.491406	-0.30974	0.30518	0	0.375796	0.298446	0.709905	0.06142	0.0193284	0.0393982	0.368869	-0.403413	-0.397859	-0.278517	0.107919	0.590084	0.903844	1.42146	1.04174	1.3038	2.01299	0.789945	-1.51229	-1.41339	-1.83557	1.56812	2.68816	2.68816	-1.25293	-1.45223	-2.14911	-1.46177	-1.91174	-1.42753	-0.985665	0.572492	-0.420921	-0.0118805	-1.42969	0.198968	0.117557
11	'Has fasted to lose weight *'	-0.463425	-0.431801	0	0.487108	0.200428	-0.169212	0.316054	-0.0946442	0.0172546	0.708199	0.980966	1.01831	0.986363	1.4969	-0.0731405	-0.0142038	0.028155	0.416154	-0.219332	-0.196469	-0.159373	0.245272	0.519243	1.02694	1.40584	0.812524	0.934273	1.3347	0.593118	-0.986485	-0.67387	-1.42387	2.94891	1.98586	2.94891	-0.916444	-0.759082	-1.30383	-0.959963	-1.16674	-0.879819	-0.528076	0.555788	-0.278358	-0.0175422	-0.792696	0.143228	0.192326
12	'Watches TV'	0.000219642	-0.235975	-0.335378	-0.148164	0.0323713	0.40217	0.179154	0.372098	-0.0908096	-0.424504	0	-0.22829	-0.224906	-0.314756	0.663139	0.244647	0.0437063	0.469019	0.268658	0.2805	0.250954	0.21064	-0.264604	-0.0928189	-0.447948	-0.423099	-0.284574	-0.582501	-0.0791575	-0.48233	-0.111259	0.663139	-0.327891	-0.321848	-0.657459	-0.427721	-0.526416	0.167043	-0.294386	0.288154	-0.175516	-0.484038	-0.629682	0.243307	0.3541	0.196202	0.354	0.0999418
13	'Has not participated in sports^'	-0.346956	-0.502041	-0.194965	0.0830096	-0.497022	-0.416567	-0.369051	-0.571602	-0.171916	0.151291	0.422361	0.246458	0.155628	0.276396	-0.214516	-0.373292	-0.428637	-0.254366	0.000813246	0	-0.00688972	-0.307015	0.30441	0.201568	-0.161989	0.0766412	-0.472355	-0.401986	0.19623	0.793629	0.812109	-0.333228	0.200144	-0.121638	-0.198024	0.495351	0.812109	0.500079	0.312562	0.409999	0.514971	0.52234	0.122091	-0.172228	-0.53459	0.377192	0.242098	0.322443
14	'Does not go to PE class+'	-0.283417	-0.359923	-0.479667	-0.495233	-0.456007	-0.50854	-0.793766	-0.667159	-0.0224718	0.155944	0.0750516	0.0831076	0.0967829	-0.0414645	0.0902462	-0.0470035	0.037203	-0.233008	0.0852297	0.0784014	0.0257462	-0.322267	0.184937	-0.0478782	-0.369733	0.0424944	-0.462333	-0.46057	0.00670485	0.829968	0.829968	-0.667959	-0.0761318	-0.1842	-0.154447	0.241125	0.297382	0.0163486	0.0231436	0.118472	-0.0104041	0.301855	-0.379233	-0.210682	0.119979	0	0.164266	0.276835
15	'Offered drugs at school ^'	0	0.0714982	0.470856	-0.377721	0.228524	0.0213586	0.149032	-0.0248433	-0.151768	-0.166829	-0.423781	-0.204988	-0.0248156	-0.0273359	0.267807	0.00988266	-0.0790035	0.934167	0.314239	0.307596	0.438105	1.92853	0.92098	1.24976	1.02846	1.07798	0.539228	0.906729	0.803276	-1.5328	-1.35365	-1.30781	-0.549617	-0.271961	-0.0596559	-1.45795	-1.48184	-1.44617	-1.50795	-1.60399	-1.34141	-1.47076	-0.210438	-0.251396	0.0285875	-0.996648	0.238917	0.140361
16	'Has ever used ecstasy'	-0.13857	0.476508	0.24073	-0.681341	-0.148255	-0.202963	0.385651	-0.596147	-0.275708	-0.0858837	-1.12011	-0.710784	-0.44572	-0.0528003	2.66585	0.840032	0.646644	0.766309	1.96782	1.98314	0.972958	1.09721	2.4222	2.65722	3.50614	2.49047	1.6226	2.81301	3.50614	-2.33595	-2.11008	-2.60744	-0.839181	-0.224618	0	-2.33228	-2.26598	-2.6824	-2.82137	-2.72753	-2.23935	-2.12749	-0.0804762	-0.185724	0.373519	-1.98455	1.90673	1.00588
17	'Has ever used injected drugs'	-0.145222	0.291632	0.537429	-0.0464583	0.109794	0	1.21769	0.0430505	-0.787616	-0.178891	-0.917159	-0.795611	-0.06119	0.108466	0.590378	-0.569953	-0.727549	0.519852	-0.685334	-0.688701	-0.540921	0.818262	1.5538	2.06884	3.98896	2.36574	2.54533	3.98896	2.11658	-3.49966	-3.40473	-3.80722	-0.79403	0.301998	0.433255	-2.44059	-2.33174	-3.16337	-3.27577	-4.10323	-2.56878	-2.03947	1.16866	-1.32674	-0.353892	-3.00117	1.01884	0.101097
18	'Has ever used steroids'	-0.223891	0.462736	0.185395	-0.0152944	0.290196	-0.339098	0.652914	-0.413073	-0.46504	-0.111456	-0.998996	-0.544477	-0.319555	0.309121	0.28743	0.0426886	-0.0674303	0.489834	-0.129924	-0.132605	0.118927	0.994676	1.13921	1.82657	3.37019	1.82608	3.37019	3.20351	1.58434	-2.84324	-2.81693	-2.85111	-0.536284	0.250976	0.491002	-2.11154	-2.05444	-2.87726	-3.04947	-2.92965	-1.90028	-2.28733	0.327016	-0.654587	0.118198	-2.36979	0	-0.0313587
19	'Has ever used methamphetamines'	-0.553735	0	0.294062	-0.496312	-0.0728108	-0.436136	0.354367	-0.580602	-0.333238	-0.129211	-0.974174	-0.631535	-0.396248	-0.0503668	1.51818	0.473424	0.302449	0.752964	1.58354	1.59238	0.588639	1.17546	2.85628	2.65942	3.92328	3.92328	1.74314	2.94097	2.36927	-2.42135	-2.35087	-3.07258	-0.740972	-0.09402	0.0846931	-2.11855	-2.17692	-2.85895	-2.7329	-3.07833	-2.19651	-2.32097	-0.0185826	-0.384355	0.037507	-2.45757	1.5811	0.796229
20	'Has ever used heroin'	-0.314662	0.43301	0.279673	-0.290231	0.0389722	-0.40431	0.642184	-0.447274	-0.576014	-0.0314576	-1.40764	-0.932779	-0.634635	-0.00158252	2.14547	0.492315	-0.0866118	0.765708	0.341769	0.403633	0.176463	1.29367	2.94035	3.0644	3.91228	3.27137	2.63534	3.91228	2.73304	-3.48549	-3.24141	-3.74934	-0.799566	-0.366212	0.248762	-2.60756	-2.54896	-3.33436	-3.38318	-4.23183	-2.4767	-2.77599	0.249365	-0.765757	-0.171647	-2.96467	0.526723	0.359179
21	'Has used cocaine*'	-0.383159	0.181792	0.0854785	-0.784396	-0.366461	-0.488391	0.101117	-0.80725	-0.78609	-0.636256	-1.27493	-0.940376	-0.81677	-0.151401	1.60443	2.06037	1.32757	0.602323	1.32328	1.33818	1.54774	1.1927	3.3776	3.3776	3.3776	2.32071	1.40491	2.30536	2.1973	-2.85044	-2.56466	-3.08101	-0.865269	-0.570631	0	-2.41241	-2.51122	-2.98366	-2.99691	-3.17444	-2.3997	-2.59838	-0.299693	-0.00222773	0.439597	-2.20273	1.46518	1.30705
22	'Has ever used cocaine '	-0.543281	0	-0.140154	-0.912314	-0.347861	-0.390802	0.131846	-0.755247	-0.484711	-0.502966	-0.973509	-0.765587	-0.534028	-0.185083	2.42799	1.10882	0.829251	0.552972	1.9589	1.96042	0.903443	1.02779	3.85567	3.85567	3.85567	3.11969	1.31968	2.39244	2.56441	-2.01551	-1.85969	-2.65068	-0.770847	-0.28227	0.162848	-1.93459	-2.17899	-2.46534	-2.51873	-2.46021	-2.13761	-2.2097	-0.296794	-0.0680986	0.446696	-1.85168	1.73055	1.15276
23	'Used marijuana at school*'	0	0.439523	0.678815	-0.489389	-0.260581	-0.236802	0.151336	-0.235049	-0.726093	-0.708478	-1.54543	-1.20055	-0.866249	-0.279737	0.884188	0.952501	0.409831	1.59747	1.98298	1.98298	1.98298	1.98298	0.801777	1.56882	1.98298	1.21285	0.949133	1.43089	1.01341	-2.74872	-2.69713	-2.40144	-1.27083	-0.990445	-0.519783	-2.49745	-2.40478	-2.39109	-2.95666	-2.85758	-2.0528	-2.39732	-0.290153	-0.302603	0.287228	-1.82178	0.938404	0.609856
24	'Used marijuana*'	-0.202181	0.143139	0.144439	-0.900759	-0.62077	-0.153824	-0.00538797	-0.441019	-0.441991	-0.614746	-1.05132	-0.830244	-0.801756	-0.380471	1.88877	1.67257	1.13073	0.918316	2.61308	2.61308	2.61308	2.61308	1.36666	2.61308	1.55499	1.31526	0.762609	0.760936	1.57838	-1.71148	-1.70778	-1.6719	-0.986248	-0.687655	-0.608262	-2.0692	-1.89235	-1.85683	-2.12704	-1.75486	-1.71772	-1.8148	-0.590838	0.182843	0.776478	-1.22173	1.48338	1.72871
25	'Age when first tried marijuana'	-0.183101	-0.0099325	0.103041	-0.996382	-0.587338	-0.16183	0.035109	-0.452986	-0.16579	-0.286783	-0.864154	-0.664194	-0.688007	-0.30583	2.03838	1.10906	1.17386	1.06468	2.9514	2.9514	2.9514	2.9514	2.55414	2.53403	1.91267	2.44951	0.641587	0.743665	2.71907	-1.52832	-1.57038	-1.51185	-0.892835	-0.676489	-0.481246	-1.83187	-1.64351	-1.70339	-1.90021	-1.53595	-1.60972	-1.62034	-0.792672	0.0783927	1.09124	-1.0096	2.00909	2.06949
26	'Smoked marijuana'	-0.18811	-0.0106619	0.112585	-1.00869	-0.602162	-0.163605	0.0265732	-0.470619	-0.180314	-0.286532	-0.874841	-0.683926	-0.69917	-0.333557	2.06278	1.0988	1.16249	1.0411	2.94111	2.94111	2.94111	2.94111	2.54599	2.51249	1.84417	2.43402	0.637625	0.740389	2.69711	-1.52813	-1.57621	-1.53033	-0.922341	-0.688686	-0.48506	-1.83616	-1.63695	-1.71104	-1.90612	-1.53774	-1.61174	-1.63899	-0.832341	0.06622	1.07249	-1.01714	2.01106	2.07064
27	'Has driven while drinking*'	-0.286577	0.513216	0.269457	-0.769323	-0.49045	-0.495064	0	-0.836622	-0.669891	-0.622066	-1.51389	-1.0786	-1.04639	-0.715624	2.19451	2.19451	2.19451	0.91768	0.70796	0.720071	0.535813	0.735788	0.669247	1.26427	0.966219	0.523463	0.521216	0.707301	0.738279	-1.85791	-2.47614	-1.80942	-1.08508	-0.661684	-0.894522	-2.22356	-2.18209	-2.37525	-2.53549	-2.23849	-2.05132	-2.10248	-0.131253	1.3508	2.19451	-1.96732	0.492698	0.87967
28	'Ridden with drunk driver *'	-0.160725	0.402508	0.216282	-0.258987	-0.127795	-0.173547	0.227378	-0.387431	-0.130913	-0.415842	-0.766534	-0.634014	-0.684363	-0.276839	0.931643	1.23109	1.08734	0.878783	0.37827	0.3838	0.618759	0.822538	0.831033	1.49902	1.04869	0.778182	0.425012	0.411032	0.855616	-1.51199	-1.4372	-1.24363	-0.669316	-0.394144	-0.551184	-1.59169	-1.46589	-1.53767	-1.66709	-1.49516	-1.28818	-1.42333	-0.327424	2.02738	2.02738	-1.24083	0.241009	0.670658
29	'Does not wear seatbelt'	0.204718	0.892583	0.698335	0.313731	0.0791215	-0.0033791	0.808398	0.293261	0	0.0698885	-0.801472	-0.512432	-0.0363961	-0.148696	-1.06335	-0.802948	-0.73577	0.13472	-0.837861	-0.804835	-0.472492	0.517418	0.284767	0.883989	1.74624	0.826384	1.08904	2.58886	0.643294	-1.99811	-1.46045	-2.43419	-0.152741	0.2817	0.106784	-0.937617	-0.891172	-1.35051	-1.32729	-1.78832	-0.613193	-0.692062	2.58886	-0.644994	0.227758	-0.15093	-0.00156408	0.106222
30	'Drank alcohol at school*'	0	0.420365	0.741562	-0.456896	-0.0328958	-0.301897	0.433902	-0.293225	-0.693283	-0.271909	-1.11849	-0.887088	-0.664185	-0.0617298	1.89608	1.89608	1.32869	1.89608	0.526623	0.543562	0.527707	1.89608	0.625577	1.27705	1.75363	1.08898	0.742908	1.4311	0.981124	-2.36085	-2.34586	-1.84445	-0.80133	-0.430879	-0.19128	-2.40677	-2.29334	-2.28523	-2.60309	-2.56462	-1.96606	-2.12497	-0.374236	0.052258	0.767736	-1.80346	0.369037	0.263517
31	'Had 5+ alcoholic drinks*'	-0.300795	0	0.0430711	-0.797141	-0.675657	-0.291933	0.168031	-0.735894	-0.610198	-0.554325	-0.930034	-0.671518	-0.782462	-0.331611	2.60212	2.60212	2.60212	1.88625	1.20557	1.2103	1.29768	1.266	1.45941	2.55985	1.45887	1.19602	0.7432	0.741256	1.41902	-1.53308	-1.96258	-1.7122	-0.631772	-0.202793	-0.223847	-1.92456	-2.14879	-2.19051	-2.16009	-1.92178	-1.79814	-1.80907	-0.687168	0.818374	2.60212	-1.59618	0.802885	1.51063
32	'Drank alcohol*'	-0.228102	0	0.0882083	-0.946582	-0.71149	-0.222964	0.34639	-0.619416	-0.482719	-0.62243	-0.890105	-0.596377	-0.705736	-0.316296	3.22459	3.22459	3.22459	3.22459	1.07382	1.07744	1.77145	1.74061	1.67092	3.22459	1.96973	1.29893	0.785253	0.830786	1.54434	-1.68535	-1.9753	-1.57933	-0.742197	-0.290928	-0.312725	-2.10067	-2.19724	-2.17455	-2.13144	-1.86756	-2.01109	-1.82236	-0.822413	0.894059	3.22459	-1.71245	0.610014	1.92304
33	'Days had at least 1 drink of alcohol'	-0.0864776	0.145996	0.259502	-0.984528	-0.619464	-0.0734124	-0.0889442	-0.45562	-0.299031	-0.225861	-0.601931	-0.355417	-0.31588	-0.014006	3.6943	3.6943	3.6943	3.6943	2.10921	2.07817	2.05907	1.74371	3.06151	2.84007	3.6943	2.4151	1.10141	2.06253	3.44157	-1.47668	-1.74511	-1.08942	-0.729717	-0.177421	-0.104206	-1.82191	-1.90394	-1.95167	-1.90386	-1.57581	-1.84622	-1.73474	-1.01139	0.666025	3.6943	-1.58998	1.41636	2.12064
34	'Smoked cigars*'	0	0.298552	0.174353	-1.03507	-0.562062	-0.336087	0.0116114	-0.521982	-0.614678	-0.689091	-1.51872	-1.11499	-0.857688	-0.635333	1.94242	1.51818	0.901932	0.377751	1.25542	1.26586	1.06236	1.0199	0.606806	1.26481	1.42234	0.842331	0.651903	1.34116	0.851529	-1.94195	-2.17873	-1.84281	-1.29027	-0.697228	-0.698296	-2.357	-2.0162	-2.21927	-2.52808	-2.31841	-2.03332	-2.2271	-0.138838	-0.119891	0.801694	-1.72618	1.81387	2.13648
35	'Has used snuff at school*'	1.06573	1.17937	1.04769	-0.576824	-0.3432	-0.292543	0.163898	-0.108199	-0.643461	-0.693046	-2.01938	-1.3636	-1.02954	-0.623437	1.24746	0.85174	1.00183	0.80285	0.146588	0.154761	-0.0295773	0.604951	0.575053	1.30319	1.9114	0.893278	1.39031	2.13098	0.861488	-2.38746	-2.62107	-1.94378	-1.12992	-0.649818	-0.175652	-2.00267	-1.87028	-2.19721	-2.82456	-2.45013	-1.85603	-2.41054	1.09953	-0.357133	0.73533	-1.65237	1.16117	0.96307
36	'Used snuff*'	0.933705	0.965175	0.781481	-0.60292	-0.454753	-0.160158	0.123395	-0.262251	-0.619692	-0.727345	-1.84412	-1.2628	-1.0276	-0.715553	1.68436	0.926858	0.915502	0.43004	0.2716	0.282722	0	0.451511	0.64102	1.19033	1.92277	0.808876	1.34324	2.10193	0.831425	-2.12499	-2.48555	-1.62207	-1.13269	-0.611033	-0.225361	-1.87845	-1.83676	-2.09332	-2.73938	-2.31513	-1.92031	-2.35045	0.69601	-0.255252	0.752305	-1.50109	1.36935	1.14169
37	'Has ever smoked cigarettes daily'	-0.250619	0.0192411	0	-0.808975	-0.659689	-0.346743	-0.0306321	-0.531704	-0.172687	0.0610047	-0.731407	-0.394015	-0.233499	-0.0643452	1.58898	0.952604	0.706607	0.175329	1.97933	1.96694	1.14424	0.767613	1.40605	1.38844	1.37775	1.35125	0.757841	1.43377	1.33873	-1.3802	-1.05226	-1.9941	-0.672376	-0.249411	-0.132738	-1.61867	-1.41103	-1.86411	-2.07594	-1.69877	-1.69839	-1.6634	0.420398	-0.258859	0.571944	-1.30491	3.65018	3.65018
38	'Smoked cigarettes at school*'	-0.0394664	0.11297	0.450801	-0.894078	-0.339088	-0.302046	0.0585603	-0.341764	-0.379162	-0.600631	-1.18822	-0.747092	-0.492546	-0.131343	1.73332	1.37914	0.812733	0.950143	2.23453	2.23817	1.48378	1.90114	0.84517	1.36209	1.59749	0.974283	0.714909	1.24028	1.20366	-2.29693	-2.0093	-2.41046	-1.22037	-1.03966	-0.647313	-2.23984	-2.07491	-2.27428	-2.72646	-2.3381	-1.91046	-2.38758	-0.0577495	-0.155035	0.575125	-1.81599	2.51331	2.51331
39	'Has smoked*'	-0.222373	0	0.0162038	-1.08317	-0.689592	-0.321647	0.0385816	-0.680329	-0.423342	-0.432458	-0.926095	-0.534691	-0.400985	-0.140071	1.91723	1.79105	1.31058	0.621023	1.91367	1.90588	1.6956	1.26598	1.58287	2.33928	1.70461	1.48975	0.579221	1.36985	1.5782	-1.4935	-1.41155	-1.85602	-0.667652	-0.324685	-0.339161	-1.84918	-1.66977	-2.01017	-2.1699	-1.89843	-1.80982	-1.80362	-0.0452278	0.201639	1.08723	-1.38524	3.61786	3.61786
40	'Has ever smoked'	-0.253091	-0.126073	0.00877381	-0.767628	-0.603962	-0.341133	0	-0.443881	-0.350981	-0.0420874	-0.686801	-0.56805	-0.384276	-0.153103	1.37766	0.642731	0.767535	0.891245	2.01879	2.01018	1.61498	1.75923	2.32537	2.66211	2.03685	2.43932	0.775281	2.45229	2.64376	-1.44136	-1.32719	-1.43726	-0.552048	-0.0785724	0.0569594	-1.57883	-1.57933	-1.62483	-1.80187	-1.39334	-1.52916	-1.48721	0.0116881	-0.0633084	0.864961	-0.901027	2.66211	2.66211
41	'Times attempted suicide *'	-0.353725	-0.0834517	0.426836	0.735712	0.428132	-0.0807164	0.928329	0.121733	0.242434	1.08712	1.50776	4.57083	3.26426	4.57083	0.082738	-0.148136	-0.231516	0.595922	-0.190381	-0.169297	-0.113429	0.67653	0.545174	1.18098	1.64399	0.943296	1.21985	1.67737	0.819666	-1.51165	-1.15745	-1.97057	0.937067	0.567809	1.19667	-1.24005	-1.15744	-1.49097	-1.3535	-1.76435	-0.989743	-1.1002	0	-0.445712	-0.207918	-1.24049	-0.0176588	0.160075
42	'Made a plan to commit suicide ^'	-0.266253	-0.277428	0.240396	0.24547	0.344859	-0.164569	0.575435	-0.0192612	0.361917	0.855559	1.53477	3.76669	3.76669	3.48339	0	-0.318439	-0.463232	0.212602	-0.336857	-0.332338	-0.315578	0.309154	0.415365	0.734744	1.23007	0.81655	0.810306	1.72685	0.645882	-1.15427	-1.05908	-1.66159	0.645666	0.375485	0.956384	-1.02774	-1.02515	-1.35127	-1.2929	-1.59504	-1.16022	-0.966403	0.331436	-0.634101	-0.319548	-1.18196	-0.0296964	0.118296
43	'Has considered suicide ^'	-0.368751	-0.465168	0.118963	0.302482	0.222776	-0.13518	0.387738	-0.164186	0.26842	0.829726	1.86834	4.94688	3.92361	4.94688	0.117378	-0.0521655	-0.195373	0.146614	-0.164699	-0.15161	-0.187151	0.131771	0.340721	0.768053	1.08884	0.738179	0.742299	1.14934	0.537734	-1.01103	-0.811338	-1.50805	0.834527	0.609751	1.17542	-0.955364	-0.938757	-1.26396	-1.11397	-1.25536	-1.07356	-0.857846	0.0123151	-0.426837	-0.19484	-1.03354	-0.0565547	0.141505
44	'Has felt sad/hopeless *'	-0.436378	-0.685208	0.105572	0.881933	0.427408	-0.10428	0.615912	-0.12825	0.502787	1.03966	2.13371	2.11824	1.94158	2.13371	0.120763	-0.0959949	-0.203989	0.16511	-0.105715	-0.101671	-0.158325	0.0367828	0.382698	0.683397	0.863879	0.645439	0.537678	1.27769	0.378304	-0.769185	-0.385536	-1.02987	1.04708	0.483853	1.06756	-0.84937	-0.718544	-0.97845	-0.814722	-0.87855	-0.794768	-0.567611	-0.0268254	-0.309458	-0.380236	-0.66559	0.0745925	0
45	'Ever had sex '	-0.552608	0.0545169	-0.156417	-0.912325	-0.635679	-0.311239	0.301845	-0.383228	0.59726	1.29	-0.958597	-0.93167	-0.937699	-0.395411	0.288433	0.023959	0.073047	0.00282567	0.824743	0.819973	0.572344	1.01198	0.766929	1.27261	1.97372	0.930745	1.01172	1.6579	1.72253	-1.6203	-1.95816	-1.60982	-1.08622	-0.677685	-0.763591	-2.06537	-1.68241	-1.66767	-1.80716	-1.39353	-1.45564	-1.54233	-0.577916	-0.449999	0.617737	-0.893368	0.357788	0.476881
46	'Forced to have sex '	-0.45952	0.00779329	0.375831	0.208497	0.433838	-0.450915	0.540103	-0.203668	1.02579	1.52076	0.320357	0.360318	0.543067	0.993766	-0.222474	-0.547626	-0.547587	0.292386	-0.236712	-0.243607	-0.44106	0.154433	0.133935	0.602766	1.52076	0.771095	0.705912	1.29665	0.693226	-1.4076	-1.37591	-2.17368	0.0550093	0.0697274	0.655457	-1.54173	-1.31043	-1.78386	-1.45132	-1.68306	-1.47599	-1.18274	0.125228	-0.678072	-0.207716	-1.41168	0	-0.225669
47	'Physically injured by boyfriend/girlfriend*'	-0.172948	0.249376	0.289682	0.0810205	0.524529	0.0872241	0.587122	-0.0448573	1.22156	1.22156	-0.0207528	-0.00522029	0.245192	0.344845	-0.0998761	-0.212149	-0.407693	0.0667788	0.0652727	0.0731536	-0.0725381	0.332585	0.347957	0.648699	1.17197	0.762835	0.548095	0.883694	0.699169	-1.39025	-1.50335	-1.64421	-0.440168	-0.349426	0.1279	-1.55329	-1.19543	-1.29389	-1.33875	-1.3191	-0.874318	-0.900005	0.251107	-0.197376	-0.0597737	-0.732371	-0.113126	-0.0207865
48	'Been in fight at school^'	0.685985	0.944454	0.964449	0.457458	1.07769	2.2722	2.2722	2.2722	0.0486383	0.0855945	-0.558294	-0.344331	-0.042491	0.317639	-0.162969	-0.255349	-0.439894	0.560332	-0.131537	-0.120547	0.0219294	0.917125	0.170916	0.721035	1.39421	0.608966	0.693558	1.80786	0.472226	-1.94144	-1.80954	-1.08781	-0.458571	-0.437597	-0.246333	-1.56155	-1.2411	-1.35598	-1.41929	-1.42728	-1.09282	-1.3034	0.637863	-0.360398	-0.133009	-0.769445	-0.112531	-0.184278
49	'Injured in a fight*'	0.480137	0.920706	0.781923	0.605508	1.13632	2.35334	2.35334	1.64305	0.0514661	0.200214	-0.443284	-0.421559	-0.0769466	0.495083	-0.425446	0.0813047	-0.16512	0.658308	-0.263496	-0.261603	-0.171591	0.674358	0.428858	1.00025	1.85451	0.914785	1.13039	2.35334	0.824872	-2.6972	-2.23614	-1.90991	-0.677024	-0.112128	-0.0903563	-1.91833	-1.59247	-2.01155	-2.18585	-2.31129	-1.39313	-1.7847	0.523849	-0.374741	0.0744613	-1.2853	-0.297801	-0.0945183
50	'Been in fight^'	0.855375	1.16866	0.874424	0.0753109	0.938066	1.5904	1.5904	1.5904	0.00631551	-0.336057	-0.708729	-0.489729	-0.362204	-0.0592144	0.0448336	-0.0333014	-0.170337	0.377256	0.00107294	-0.00379478	0.13472	0.740967	0.360957	0.865489	1.26276	0.579029	0.593129	1.5904	0.691006	-1.95722	-1.82891	-1.23214	-0.707543	-0.578903	-0.617636	-1.91322	-1.68236	-1.54234	-1.78996	-1.5937	-1.36881	-1.79752	0.166819	-0.32092	0.0341442	-0.934652	-0.184187	0
51	'Been threatened at school^'	0.647277	1.02194	1.03699	1.24829	1.67751	0.909525	1.56253	0.874743	0.415079	0.520155	-0.205582	-0.160315	0.118684	0.421093	-0.52976	-0.550369	-0.582602	0.617716	-0.466026	-0.457845	-0.360768	0.688647	0.375357	0.958878	1.67751	0.913812	1.19388	1.67165	0.717172	-1.93323	-1.93791	-1.63048	-0.366444	-0.229853	0.0242394	-1.50232	-1.31731	-1.61335	-1.67452	-1.74245	-1.33079	-1.32255	0.220778	-0.303709	0.0102171	-1.22172	-0.475558	-0.396486
52	'Felt unsafe at school*'	-0.168228	0.452318	0.610625	1.7045	1.43739	0.235866	1.22081	0.443609	0.160667	0.48391	0.43804	0.108488	0.208391	0.917769	-0.705726	-0.596365	-0.51499	0.382812	-0.683453	-0.677791	-0.45166	0.648936	0	0.73004	1.5374	0.679407	1.07749	1.7045	0.373182	-1.78336	-1.16878	-1.62192	0.109332	0.187854	0.396252	-1.38018	-1.30836	-1.60558	-1.59247	-1.73072	-1.03982	-1.05167	0.644484	-0.245803	-0.0795589	-1.2622	-0.450127	-0.600971
53	'Carried weapon at school'	2.04537	2.04537	2.04537	0.112218	0.727685	0.536573	0.898819	0.452194	-0.129077	0.152838	-0.836727	-0.573437	-0.295089	0.110486	0.0398971	-0.0599805	-0.173184	1.08286	-0.0605876	-0.0767748	0.0951321	1.31873	0.273755	1.10151	1.6089	0.971375	0.779771	1.78998	0.796848	-2.2662	-1.94516	-2.30754	-0.876182	-0.747981	-0.579656	-1.84231	-1.54362	-1.68536	-2.247	-2.04112	-1.48459	-1.92741	0.530682	-0.268941	0.460815	-0.937608	-0.172131	0
54	'Carried a gun*'	2.11898	2.11898	2.11898	0.0275211	0.786235	0.904414	1.11121	0.505808	-0.0957747	-0.14159	-1.5539	-1.08396	-0.739305	-0.326192	0	-0.0745797	-0.142646	0.835277	-0.110226	-0.116139	0.167441	1.15305	0.487517	1.27143	1.83584	0.750922	1.13072	1.61779	1.10623	-2.07285	-2.17863	-2.13453	-1.23437	-0.621182	-0.552087	-1.88918	-1.46402	-1.59354	-2.23314	-1.99723	-1.40858	-1.66683	0.798539	-0.00910641	0.778183	-0.990133	-0.233369	0.0574053
55	'Carried a weapon '	1.65335	1.65335	1.65335	-0.303717	0.700885	0.88044	0.95995	0.536647	-0.228791	-0.319596	-1.01576	-0.698234	-0.438821	-0.307158	0.056834	-0.0133743	-0.154133	0.704219	0.00163357	0	0.111429	1.00283	0.233544	0.995787	1.37748	0.486495	0.733401	1.47025	0.780464	-1.70704	-1.73424	-1.60903	-0.97669	-0.82644	-0.710316	-1.74406	-1.50219	-1.38748	-1.94968	-1.5954	-1.39613	-1.83869	0.399981	-0.283031	0.267697	-0.792166	-0.07108	0.12434
[truncated: 7 more columns]

## Sheet: 2005 Raw OR
Question #	Questions	Carried a weapon	Carried a gun*	Carried weapon at school	Felt unsafe at school*	Been threatened at school^	Been in fight^	Injured in a fight*	Been in fight at school^	Physically injured by boyfriend/girlfriend*	Forced to have sex	Has felt sad/hopeless *	Has considered suicide ^	Made a plan to commit suicide ^	Times attempted suicide *	Days had at least 1 drink of alcohol	Drank alcohol*	Had 5+ alcoholic drinks*	Drank alcohol at school*	Smoked marijuana	Age when first tried marijuana	Used marijuana*	Used marijuana at school*	Has ever used cocaine	Has used cocaine*	Has ever used heroin	Has ever used methamphetamines	Has ever used steroids	Has ever used injected drugs	Has ever used ecstasy	Does not go to PE class+	Has not participated in sports^	Watches TV	Has fasted to lose weight *	Has taken pill to lose weight *	Has vomited to lose weight*	No fruit juice+	No fruit+	No green salad+	No potatoes+	No carrots	No vegetables+	No milk+	Does not wear seatbelt	Ridden with drunk driver *	Has driven while drinking*	Does not wear sunscreen	Has ever smoked	Has smoked*
1	'Does not wear sunscreen'	1.49488	1.59379	1.5436	1.20941	1.23064	1.68292	1.58107	1.53087	1.59568	1.21485	1.16601	1.06798	1.04455	1.17877	1.31618	1.17008	1.0459	1.56321	1.67288	1.66608	1.57926	1.54508	1.36622	1.44257	1.23349	1.17324	1.37829	1.14939	1.28189	1.1363	1.47051	1.08992	0.702191	0.933237	0.954516	1.42078	1.99273	1.97264	1.39358	2.09418	1.96024	1.86087	2.73805	1.20348	1.258	Inf	1.6868	1.30343
2	'No milk+'	0.823682	0.865864	1.03901	1.34114	0.971651	0.839151	1.06937	0.813727	1.38919	1.51548	1.24446	1.18403	1.26243	1.37974	1.06045	1.00003	0.871675	1.14048	1.16192	1.16379	1.05051	0.9451	1.01197	1.19001	1.5245	1.05694	1.04797	1.64892	1.24363	1.42243	1.70503	0.70329	0.787352	1.3999	1.67195	1.90735	2.3815	1.50559	1.63623	1.94599	2.01942	Inf	1.79782	1.14509	1.09481	1.86087	1.19102	1.05108
3	'No vegetables+'	1.11266	1.20454	1.29214	1.49472	1.10565	1.13945	1.25031	1.27938	1.30505	1.25491	1.1914	1.22731	1.23318	1.48456	1.02095	0.987662	1.00773	1.07269	1.17077	1.17129	1.2671	1.48273	1.40455	1.82032	1.48647	1.21645	1.34087	1.56932	1.24025	1.09246	1.61831	0.87267	0.676042	1.08955	1.44666	2.52622	4.33935	3.92166	3.04072	4.6003	Inf	2.01942	2.43634	1.15285	1.05474	1.96024	1.23697	1.16699
4	'No carrots'	0.920614	0.797294	0.906481	0.878827	0.803212	1.0999	0.786998	1.07667	1.1508	1.06707	1.11981	0.995191	1.02267	0.969079	1.29589	1.03671	0.943721	1.04672	1.25127	1.23647	1.14294	1.06802	0.914563	0.933129	0.70425	0.871701	0.7345	0.792511	0.870437	1.19285	1.46803	1.24265	0.759589	0.886435	0.872048	2.04115	3.68269	3.8842	2.65893	Inf	4.6003	1.94599	1.2761	1.0714	1.05238	2.09418	1.32946	1.1532
5	'No potatoes+'	0.776901	0.733877	0.768753	0.992336	0.872999	0.909703	0.917701	0.944902	0.932053	0.967235	1.02703	1.05478	1.05687	0.974582	0.917115	0.787428	0.721547	0.934453	1.0037	1.00231	0.921008	0.824353	0.884773	0.905641	0.777526	0.803708	0.788471	0.945421	0.872071	1.19001	1.46509	0.800399	0.887602	0.982971	1.10824	1.91764	2.3466	2.23258	Inf	2.65893	3.04072	1.63623	1.15807	0.885519	0.774949	1.39358	1.00263	0.853381
6	'No green salad+'	1.10936	1.07181	1.13037	1.02588	1.00686	1.07343	1.06372	1.06066	1.10454	1.00831	1.00818	0.965493	1.02407	0.925985	0.91835	0.773416	0.716081	0.800233	1.058	1.05154	1.00279	1.11444	0.973414	0.979643	1.03511	0.844708	0.742465	0.899068	0.84884	1.15923	1.43017	1.09623	0.636611	0.73947	0.786616	2.15635	3.72342	Inf	2.23258	3.8842	3.92166	1.50559	1.14843	0.93249	0.785786	1.97264	1.11293	0.922532
7	'No fruit+'	1.0145	0.893742	1.2178	1.12743	0.885826	0.947216	1.07473	1.08906	1.2606	1.27813	1.18194	1.2204	1.26273	1.30037	1.04731	0.892992	0.833226	1.03476	1.09983	1.10021	1.03109	1.13942	1.12871	1.24865	1.49595	1.21323	1.23807	1.70109	1.07877	1.34079	1.95727	0.891176	0.62964	0.994131	1.39182	3.64855	Inf	3.72342	2.3466	3.68269	4.33935	2.3815	2.04497	1.00101	1.02105	1.99273	1.15543	1.08232
8	'No fruit juice+'	0.90898	0.954894	1.14688	1.03583	0.894296	0.799089	0.795655	0.886223	1.04825	0.978466	1.12417	1.2565	1.32782	1.2682	0.897687	0.845834	0.864402	1.03277	0.840598	0.835887	0.800484	1.0228	1.1157	1.37455	1.68825	1.1858	1.23076	1.57583	1.08184	1.23033	1.6182	0.716455	0.862243	1.28327	1.32858	Inf	3.64855	2.15635	1.91764	2.04115	2.52622	1.90735	1.59062	0.908548	0.909765	1.42078	1.0173	0.97106
9	'Has vomited to lose weight*'	1.64411	2.30345	2.52724	3.21459	3.10511	1.58136	3.36175	2.02704	3.43087	3.96578	4.0814	5.06051	4.56169	7.29708	2.87788	2.47079	2.78648	4.04956	2.29777	2.29991	2.20939	2.87375	4.06003	5.45091	10.6318	5.68843	6.68672	11.5818	5.53451	1.08627	0.968906	0.593167	2.91391	11.6886	Inf	1.32858	1.39182	0.786616	1.10824	0.872048	1.44666	1.67195	2.47693	2.34421	2.52595	0.954516	2.64706	3.02153
10	'Has taken pill to lose weight *'	1.74969	2.36382	2.34772	2.65242	2.78601	1.71611	3.2636	2.07599	2.46408	3.46011	2.94615	3.52124	3.53433	4.54841	4.11223	2.81268	2.84684	3.51615	2.33151	2.3536	2.39888	3.09627	3.66291	4.51994	8.22694	5.47478	7.32838	8.54377	4.64003	0.979704	1.07473	0.889358	3.75737	Inf	11.6886	1.28327	0.994131	0.73947	0.982971	0.886435	1.08955	1.3999	2.58546	2.22494	2.6571	0.933237	3.23975	3.01563
11	'Has fasted to lose weight *'	0.850156	0.86751	0.837593	1.07309	0.982917	0.995285	0.862529	0.979743	0.949301	1.07323	1.21074	1.36944	1.25154	1.26074	1.26033	1.20785	1.1604	1.1135	0.939809	0.935204	0.889199	0.956885	1.01855	0.847893	0.818156	1.12742	1.14393	0.885126	0.947294	0.741356	0.718044	1.19922	Inf	3.75737	2.91391	0.862243	0.62964	0.636611	0.887602	0.759589	0.676042	0.787352	0.692897	1.09479	1.00228	0.702191	1.06094	1.02818
12	'Watches TV'	1.00488	1.1934	0.980536	0.889611	0.795663	1.07128	0.803337	1.05851	0.686799	0.598873	0.728441	0.779749	0.710118	0.695023	1.36532	1.15779	1.08701	1.20351	0.985663	0.989565	1.02627	1.04285	0.711501	0.856773	0.525666	0.641588	0.789453	0.646214	0.637785	0.645336	0.823727	Inf	1.19922	0.889358	0.593167	0.716455	0.891176	1.09623	0.800399	1.24265	0.87267	0.70329	0.72013	1.13205	1.24947	1.08992	1.12562	0.847504
13	'Has not participated in sports^'	0.910465	0.676907	0.989633	1.05961	0.754776	0.800654	0.818357	0.719616	1.08367	1.26187	1.51723	1.40037	1.40498	1.3958	1.1266	0.987232	0.891275	0.915092	1.17454	1.16665	1.21552	1.02606	1.3287	1.24432	1.0547	1.42069	0.776588	0.871927	1.09547	2.03885	Inf	0.823727	0.718044	1.07473	0.968906	1.6182	1.95727	1.43017	1.46509	1.46803	1.61831	1.70503	1.21227	0.984894	0.847543	1.47051	1.37527	1.51103
14	'Does not go to PE class+'	0.797413	0.676756	0.732334	0.695805	0.726049	0.727505	0.633434	0.620712	1.08575	1.1097	1.09711	1.07594	1.01114	0.92284	1.07279	1.00007	1.00881	0.849783	1.07285	1.06827	0.985639	0.740761	1.12502	0.968079	0.737071	0.966273	0.627371	0.641263	0.939892	Inf	2.03885	0.645336	0.741356	0.979704	1.08627	1.23033	1.34079	1.15923	1.19001	1.19285	1.09246	1.42243	0.815218	0.931778	1.13554	1.1363	1.03527	1.15823
15	'Offered drugs at school ^'	2.61974	2.73636	3.29894	1.65065	2.97216	2.48009	2.62995	2.45683	2.1875	2.14355	1.98387	2.47916	2.38794	2.57204	3.52044	2.70629	2.55287	4.65996	3.5847	3.57683	3.62287	8.62759	5.11049	6.03075	5.54444	4.54003	3.7077	5.7817	4.58763	0.946792	0.959915	0.986816	1.2315	2.36691	2.56415	0.845629	0.958268	1.05406	0.959114	1.09485	1.08111	0.944147	1.92562	2.24532	2.68491	1.29034	2.88872	2.8318
16	'Has ever used ecstasy'	4.58053	6.11692	6.50787	3.23333	4.9453	4.92756	6.93399	4.27953	3.36154	4.70619	2.67439	3.49485	3.69844	5.54826	16.6259	8.86379	8.09773	6.71804	18.4351	18.704	10.31	11.2951	26.8341	27.5081	58.5345	30.5218	14.7329	51.242	Inf	0.939892	1.09547	0.637785	0.947294	4.64003	5.53451	1.08184	1.07877	0.84884	0.872071	0.870437	1.24025	1.24363	5.57666	3.97889	7.18105	1.28189	11.3914	9.55522
17	'Has ever used injected drugs'	8.58707	10.4255	12.3643	6.72813	9.36926	7.88382	12.175	7.8276	6.07417	8.66383	3.29353	5.44642	6.20698	13.0246	11.8583	9.8528	8.72521	15.6257	15.9735	16.8476	10.6238	18.7135	54.1127	50.136	346.475	70.3547	64.4892	Inf	51.242	0.641263	0.871927	0.646214	0.885126	8.54377	11.5818	1.57583	1.70109	0.899068	0.945421	0.792511	1.56932	1.64892	12.6535	4.20247	8.50117	1.14939	11.5779	11.9751
18	'Has ever used steroids'	4.7337	6.49128	6.92239	4.18638	6.28759	4.70059	7.51244	4.97605	3.80151	5.16402	2.42845	3.96784	4.0266	6.55234	8.15013	5.95889	5.44814	7.46651	6.83662	7.08556	6.01037	9.01091	12.0367	15.5369	47.3827	16.9571	Inf	64.4892	14.7329	0.627371	0.776588	0.789453	1.14393	7.32838	6.68672	1.23076	1.23807	0.742465	0.788471	0.7345	1.34087	1.04797	7.01559	3.24769	5.75015	1.37829	6.6946	5.86021
19	'Has ever used methamphetamines'	4.1366	5.04351	5.77176	2.8389	4.14224	3.81242	5.25047	4.01187	3.1804	5.15163	3.20609	4.24099	4.29944	6.32451	22.1254	7.60293	7.59849	8.05723	23.3803	23.6851	10.1582	10.8942	52.2615	41.0645	84.5587	Inf	16.9571	70.3547	30.5218	0.966273	1.42069	0.641588	1.12742	5.47478	5.68843	1.1858	1.21323	0.844708	0.803708	0.871701	1.21645	1.05694	6.11941	3.85686	6.18688	1.17324	15.0641	10.8647
20	'Has ever used heroin'	8.77461	11.1047	10.8225	6.17508	8.5955	8.49868	12.5749	6.84446	5.38876	7.56711	3.56618	5.05833	6.5188	12.2084	9.70475	10.2258	8.76903	14.5404	32.5044	34.0927	13.7379	17.8088	99.3917	62.6188	Inf	84.5587	47.3827	346.475	58.5345	0.737071	1.0547	0.525666	0.818156	8.22694	10.6318	1.68825	1.49595	1.03511	0.777526	0.70425	1.48647	1.5245	9.81086	3.95447	7.58464	1.23349	12.7945	14.0702
21	'Has used cocaine*'	5.70779	7.74004	7.28718	3.56331	4.98892	5.49883	5.64263	4.99472	3.44921	4.93271	2.89483	3.47198	3.8386	5.80236	38.4796	15.9671	14.2806	10.5479	40.8626	41.2598	29.2129	18.2698	Inf	Inf	62.6188	41.0645	15.5369	50.136	27.5081	0.968079	1.24432	0.856773	0.847893	4.51994	5.45091	1.37455	1.24865	0.979643	0.905641	0.933129	1.82032	1.19001	6.92918	5.58144	9.7579	1.44257	18.5896	19.863
22	'Has ever used cocaine '	4.05298	4.49421	4.72075	2.62285	3.49978	3.6487	4.36179	3.30559	2.62583	3.72862	2.46168	3.30535	3.29949	4.71379	46.1074	8.17065	8.71814	7.35074	29.0499	29.1946	10.416	12.1227	Inf	Inf	99.3917	52.2615	12.0367	54.1127	26.8341	1.12502	1.3287	0.711501	1.01855	3.66291	4.06003	1.1157	1.12871	0.973414	0.884773	0.914563	1.40455	1.01197	4.45907	4.53519	7.10492	1.36622	18.4525	11.9002
23	'Used marijuana at school*'	6.19613	7.50515	9.16517	3.18128	4.47132	4.90703	5.60483	4.86508	3.13324	2.90166	2.0026	2.23908	2.85465	3.67564	19.3407	8.85383	7.97656	15.1166	Inf	Inf	Inf	Inf	12.1227	18.2698	17.8088	10.8942	9.01091	18.7135	11.2951	0.740761	1.02606	1.04285	0.956885	3.09627	2.87375	1.0228	1.13942	1.11444	0.824353	1.06802	1.48273	0.9451	4.03065	4.56509	5.73182	1.54508	7.36722	8.81665
24	'Used marijuana*'	3.30301	3.69038	3.81802	1.97301	2.38279	3.29114	3.43724	2.772	2.54038	2.39112	1.6718	1.83733	1.89251	2.45093	17.5094	9.44562	7.80654	6.16244	Inf	Inf	Inf	Inf	10.416	29.2129	13.7379	10.1582	6.01037	10.6238	10.31	0.985639	1.21552	1.02627	0.889199	2.39888	2.20939	0.800484	1.03109	1.00279	0.921008	1.14294	1.2671	1.05051	2.33597	3.67649	6.07617	1.57926	9.84154	11.7816
25	'Age when first tried marijuana'	2.88832	2.94415	3.40244	1.73539	2.17666	3.14186	3.27637	2.66947	2.70957	2.83823	1.78661	2.00925	1.93567	2.54856	20.0854	6.53799	7.32389	6.78381	Inf	Inf	Inf	Inf	29.1946	41.2598	34.0927	23.6851	7.08556	16.8476	18.704	1.06827	1.16665	0.989565	0.935204	2.3536	2.29991	0.835887	1.10021	1.05154	1.00231	1.23647	1.17129	1.16379	2.17143	3.28404	7.20557	1.66608	13.5055	13.4679
26	'Smoked marijuana'	2.8412	2.87619	3.33327	1.67981	2.12169	3.12307	3.23223	2.65183	2.67269	2.81997	1.78671	2.00775	1.92999	2.53369	19.8685	6.53422	7.33407	6.6725	Inf	Inf	Inf	Inf	29.0499	40.8626	32.5044	23.3803	6.83662	15.9735	18.4351	1.07285	1.17454	0.985663	0.939809	2.33151	2.29777	0.840598	1.09983	1.058	1.0037	1.25127	1.17077	1.16192	2.14602	3.251	7.21031	1.67288	13.5918	13.5375
27	'Has driven while drinking*'	3.91177	5.94254	4.90491	1.69589	2.60463	2.68748	3.32194	2.1735	2.82943	2.31272	1.43861	1.79318	1.81826	2.03044	Inf	Inf	20.0079	7.51497	7.21031	7.20557	6.07617	5.73182	7.10492	9.7579	7.58464	6.18688	5.75015	8.50117	7.18105	1.13554	0.847543	1.24947	1.00228	2.6571	2.52595	0.909765	1.02105	0.785786	0.774949	1.05238	1.05474	1.09481	5.17987	8.09887	Inf	1.258	6.61791	7.0523
28	'Ridden with drunk driver *'	2.3778	3.14811	3.23992	2.21085	2.64406	2.36449	3.02366	1.98684	2.18606	2.29045	1.7739	1.75044	1.70227	2.0016	6.08578	5.40312	5.15272	5.01083	3.251	3.28404	3.67649	4.56509	4.53519	5.58144	3.95447	3.85686	3.24769	4.20247	3.97889	0.931778	0.984894	1.13205	1.09479	2.22494	2.34421	0.908548	1.00101	0.93249	0.885519	1.0714	1.15285	1.14509	2.05893	Inf	8.09887	1.20348	3.03567	3.60338
29	'Does not wear seatbelt'	3.52509	5.46945	4.50107	2.41155	3.66013	2.58669	3.77709	2.88077	2.79455	2.64639	1.33477	1.60613	1.47245	2.94039	1.42005	2.38847	2.93771	4.15006	2.14602	2.17143	2.33597	4.03065	4.45907	6.92918	9.81086	6.11941	7.01559	12.6535	5.57666	0.815218	1.21227	0.72013	0.692897	2.58546	2.47693	1.59062	2.04497	1.14843	1.15807	1.2761	2.43634	1.79782	Inf	2.05893	5.17987	2.73805	2.29423	3.03118
30	'Drank alcohol at school*'	4.74932	6.61244	7.22382	2.95479	4.44664	3.45238	5.11755	4.08584	3.14102	3.353	2.262	2.73184	3.0923	3.68826	Inf	Inf	10.6929	Inf	6.6725	6.78381	6.16244	15.1166	7.35074	10.5479	14.5404	8.05723	7.46651	15.6257	6.71804	0.849783	0.915092	1.20351	1.1135	3.51615	4.04956	1.03277	1.03476	0.800233	0.934453	1.04672	1.07269	1.14048	4.15006	5.01083	7.51497	1.56321	5.23974	4.89892
31	'Had 5+ alcoholic drinks*'	2.87429	3.84599	3.48546	1.54578	2.04549	2.54423	2.85582	2.06769	2.124	2.07364	1.60165	1.97739	1.78153	2.23131	Inf	Inf	Inf	10.6929	7.33407	7.32389	7.80654	7.97656	8.71814	14.2806	8.76903	7.59849	5.44814	8.72521	8.09773	1.00881	0.891275	1.08701	1.1604	2.84684	2.78648	0.864402	0.833226	0.716081	0.721547	0.943721	1.00773	0.871675	2.93771	5.15272	20.0079	1.0459	6.5194	9.06597
32	'Drank alcohol*'	2.94479	3.61366	3.81799	1.78185	2.01788	2.59082	2.54495	1.97261	2.3333	2.29631	1.73713	2.04894	1.96263	2.29831	Inf	Inf	Inf	Inf	6.53422	6.53799	9.44562	8.85383	8.17065	15.9671	10.2258	7.60293	5.95889	9.8528	8.86379	1.00007	0.987232	1.15779	1.20785	2.81268	2.47079	0.845834	0.892992	0.773416	0.787428	1.03671	0.987662	1.00003	2.38847	5.40312	Inf	1.17008	5.30396	9.53423
33	'Days had at least 1 drink of alcohol'	3.16789	3.04024	3.97615	1.55077	2.27929	2.87816	2.36157	2.32084	3.11486	3.56522	2.29091	2.71335	2.66964	3.41339	Inf	Inf	Inf	Inf	19.8685	20.0854	17.5094	19.3407	46.1074	38.4796	9.70475	22.1254	8.15013	11.8583	16.6259	1.07279	1.1266	1.36532	1.26033	4.11223	2.87788	0.897687	1.04731	0.91835	0.917115	1.29589	1.02095	1.06045	1.42005	6.08578	Inf	1.31618	11.6771	19.3928
34	'Smoked cigars*'	4.52338	5.45546	4.76353	2.05976	2.83724	3.18333	4.03646	2.58991	2.29865	2.34778	1.72923	1.93296	1.98158	2.30158	20.8593	9.06666	7.28241	5.53208	10.5665	10.6095	9.11721	8.48547	6.87082	9.45453	11.0264	6.1101	6.71067	9.74649	6.50093	0.971844	1.00703	1.08161	0.941494	2.5434	2.35329	0.751841	0.909179	0.938354	0.720157	0.923986	1.15702	0.893113	2.72859	3.17227	5.94384	1.36434	15.3479	19.9631
35	'Has used snuff at school*'	7.65281	7.33757	7.73311	2.05997	3.51914	3.42061	4.28645	3.24958	2.77869	2.2421	1.12516	1.69511	1.66886	2.20392	10.717	8.17657	7.5666	7.29873	5.47578	5.46546	4.37958	5.63774	5.99491	8.27831	13.8828	6.53532	10.1099	12.9592	5.44921	0.702443	0.648638	1.23218	0.891572	3.02625	2.37608	0.974949	0.960406	0.78514	0.57	0.848366	1.04659	0.653523	6.20438	2.84844	6.73727	1.25885	9.4311	8.83708
36	'Used snuff*'	6.03089	6.1608	6.17786	2.18456	2.90842	3.17315	3.82455	2.9301	2.28763	2.08053	1.1108	1.69854	1.68144	2.15873	9.36071	7.25667	7.17683	5.27233	4.51672	4.53598	3.67919	4.39241	5.3332	7.66453	14.263	5.95098	9.23431	13.6671	5.24277	0.770403	0.605625	1.0923	0.864955	2.81437	2.3612	0.929399	0.927673	0.761956	0.560752	0.815121	0.961284	0.666666	5.00393	2.6981	6.3918	1.17992	8.09846	8.24344
37	'Has ever smoked cigarettes daily'	3.02691	3.27342	3.74538	1.7751	2.65269	2.76437	3.35407	2.3234	2.5288	3.45576	2.24016	2.60817	2.538	3.08304	20.2931	5.83438	6.35824	3.95172	16.442	16.421	7.85142	5.72224	10.9208	11.1371	10.9294	11.2296	5.39898	10.0344	9.7852	1.19817	1.86013	0.690417	0.844983	3.18786	2.98874	1.16573	1.26813	0.999231	0.8406	1.15551	1.18164	1.12966	4.1437	2.90496	5.40134	1.46692	Inf	46.9894
38	'Smoked cigarettes at school*'	4.52763	5.15483	6.89283	2.88619	4.02902	4.37991	5.25982	3.81783	2.97972	3.35561	2.44587	2.97622	3.12948	3.72322	16.6205	10.5711	7.76514	9.16151	17.3235	17.367	13.3807	17.7592	10.1971	13.4438	14.08	10.0171	6.53705	13.3356	9.66854	0.962007	1.35704	0.914911	0.888574	2.89656	3.53536	0.994347	1.081	0.987487	0.898209	1.10255	1.4076	0.995542	4.70064	4.17418	6.54479	1.41691	Inf	Inf
39	'Has smoked*'	3.37956	3.61042	4.16885	2.05182	2.67829	2.92107	3.41655	2.34654	2.28951	2.79639	2.1281	2.67735	2.56727	3.27958	19.3928	9.53423	9.06597	4.89892	13.5375	13.4679	11.7816	8.81665	11.9002	19.863	14.0702	10.8647	5.86021	11.9751	9.55522	1.15823	1.51103	0.847504	1.02818	3.01563	3.02153	0.97106	1.08232	0.922532	0.853381	1.1532	1.16699	1.05108	3.03118	3.60338	7.0523	1.30343	Inf	Inf
40	'Has ever smoked'	2.77939	2.48416	3.45277	1.75927	2.19748	2.65032	2.89503	2.40405	2.3761	3.40039	1.98078	2.40091	2.31668	3.10237	11.6771	5.30396	6.5194	5.23974	13.5918	13.5055	9.84154	7.36722	18.4525	18.5896	12.7945	15.0641	6.6946	11.5779	11.3914	1.03527	1.37527	1.12562	1.06094	3.23975	2.64706	1.0173	1.15543	1.11293	1.00263	1.32946	1.23697	1.19102	2.29423	3.03567	6.61791	1.6868	Inf	Inf
41	'Times attempted suicide *'	2.24871	2.18568	3.49336	4.06508	4.23241	2.5787	4.73402	2.74855	3.27298	5.60205	8.90449	60.6271	33.9733	Inf	3.41339	2.29831	2.23131	3.68826	2.53369	2.54856	2.45093	3.67564	4.71379	5.80236	12.2084	6.32451	6.55234	13.0246	5.54826	0.92284	1.3958	0.695023	1.26074	4.54841	7.29708	1.2682	1.30037	0.925985	0.974582	0.969079	1.48456	1.37974	2.94039	2.0016	2.03044	1.17877	3.10237	3.27958
42	'Made a plan to commit suicide ^'	1.94827	1.64835	2.77164	2.56172	3.36449	2.03364	2.86611	2.10546	2.87071	4.08561	7.71188	41.5108	Inf	33.9733	2.66964	1.96263	1.78153	3.0923	1.92999	1.93567	1.89251	2.85465	3.29949	3.8386	6.5188	4.29944	4.0266	6.20698	3.69844	1.01114	1.40498	0.710118	1.25154	3.53433	4.56169	1.32782	1.26273	1.02407	1.05687	1.02267	1.23318	1.26243	1.47245	1.70227	1.81826	1.04455	2.31668	2.56727
43	'Has considered suicide ^'	1.72886	1.54166	2.42293	2.20559	2.87088	1.97833	2.75742	1.968	2.67878	4.22621	8.96552	Inf	41.5108	60.6271	2.71335	2.04894	1.97739	2.73184	2.00775	2.00925	1.83733	2.23908	3.30535	3.47198	5.05833	4.24099	3.96784	5.44642	3.49485	1.07594	1.40037	0.779749	1.36944	3.52124	5.06051	1.2565	1.2204	0.965493	1.05478	0.995191	1.22731	1.18403	1.60613	1.75044	1.79318	1.06798	2.40091	2.67735
44	'Has felt sad/hopeless *'	1.37302	1.2007	1.9391	3.16596	2.76142	1.72814	2.46338	1.67446	2.54821	3.73422	Inf	8.96552	7.71188	8.90449	2.29091	1.73713	1.60165	2.262	1.78671	1.78661	1.6718	2.0026	2.46168	2.89483	3.56618	3.20609	2.42845	3.29353	2.67439	1.09711	1.51723	0.728441	1.21074	2.94615	4.0814	1.12417	1.18194	1.00818	1.02703	1.11981	1.1914	1.24446	1.33477	1.7739	1.43861	1.16601	1.98078	2.1281
45	'Ever had sex '	2.37265	3.26265	2.98174	1.97133	2.13858	2.69026	4.43261	2.6098	4.45173	9.99424	1.79604	1.79996	1.89932	2.56789	5.46358	3.56369	3.95761	4.07571	6.71416	6.71295	5.19246	5.77457	6.51935	9.81492	10.4186	6.03074	4.47505	12.436	10.5721	1.24034	1.0863	0.946419	0.877135	2.20199	1.97238	0.826762	1.27063	1.09823	0.95536	1.37172	1.3398	1.49829	3.2891	2.37891	5.42906	1.91991	4.66954	4.78234
46	'Forced to have sex '	1.83076	2.57815	2.60072	3.18585	3.58322	2.25647	3.95088	2.26235	6.15956	Inf	3.73422	4.22621	4.08561	5.60205	3.56522	2.29631	2.07364	3.353	2.81997	2.83823	2.39112	2.90166	3.72862	4.93271	7.56711	5.15163	5.16402	8.66383	4.70619	1.1097	1.26187	0.598873	1.07323	3.46011	3.96578	0.978466	1.27813	1.00831	0.967235	1.06707	1.25491	1.51548	2.64639	2.29045	2.31272	1.21485	3.40039	2.79639
47	'Physically injured by boyfriend/girlfriend*'	2.56499	3.02406	3.4308	2.9687	3.42368	2.59469	4.11021	2.47043	Inf	6.15956	2.54821	2.67878	2.87071	3.27298	3.11486	2.3333	2.124	3.14102	2.67269	2.70957	2.54038	3.13324	2.62583	3.44921	5.38876	3.1804	3.80151	6.07417	3.36154	1.08575	1.08367	0.686799	0.949301	2.46408	3.43087	1.04825	1.2606	1.10454	0.932053	1.1508	1.30505	1.38919	2.79455	2.18606	2.82943	1.59568	2.3761	2.28951
48	'Been in fight at school^'	3.69354	4.98439	4.68302	3.14705	5.09361	Inf	10.5933	Inf	2.47043	2.26235	1.67446	1.968	2.10546	2.74855	2.32084	1.97261	2.06769	4.08584	2.65183	2.66947	2.772	4.86508	3.30559	4.99472	6.84446	4.01187	4.97605	7.8276	4.27953	0.620712	0.719616	1.05851	0.979743	2.07599	2.02704	0.886223	1.08906	1.06066	0.944902	1.07667	1.27938	0.813727	2.88077	1.98684	2.1735	1.53087	2.40405	2.34654
49	'Injured in a fight*'	5.4351	7.26916	6.8371	6.55408	7.80224	Inf	Inf	10.5933	4.11021	3.95088	2.46338	2.75742	2.86611	4.73402	2.36157	2.54495	2.85582	5.11755	3.23223	3.27637	3.43724	5.60483	4.36179	5.64263	12.5749	5.25047	7.51244	12.175	6.93399	0.633434	0.818357	0.803337	0.862529	3.2636	3.36175	0.795655	1.07473	1.06372	0.917701	0.786998	1.25031	1.06937	3.77709	3.02366	3.32194	1.58107	2.89503	3.41655
50	'Been in fight^'	4.67477	5.64767	5.17276	2.80318	4.72974	Inf	Inf	Inf	2.59469	2.25647	1.72814	1.97833	2.03364	2.5787	2.87816	2.59082	2.54423	3.45238	3.12307	3.14186	3.29114	4.90703	3.6487	5.49883	8.49868	3.81242	4.70059	7.88382	4.92756	0.727505	0.800654	1.07128	0.995285	1.71611	1.58136	0.799089	0.947216	1.07343	0.909703	1.0999	1.13945	0.839151	2.58669	2.36449	2.68748	1.68292	2.65032	2.92107
51	'Been threatened at school^'	4.32196	5.31502	6.12888	8.02766	Inf	4.72974	7.80224	5.09361	3.42368	3.58322	2.76142	2.87088	3.36449	4.23241	2.27929	2.01788	2.04549	4.44664	2.12169	2.17666	2.38279	4.47132	3.49978	4.98892	8.5955	4.14224	6.28759	9.36926	4.9453	0.726049	0.754776	0.795663	0.982917	2.78601	3.10511	0.894296	0.885826	1.00686	0.872999	0.803212	1.10565	0.971651	3.66013	2.64406	2.60463	1.23064	2.19748	2.67829
52	'Felt unsafe at school*'	2.23773	2.77323	3.54427	Inf	8.02766	2.80318	6.55408	3.14705	2.9687	3.18585	3.16596	2.20559	2.56172	4.06508	1.55077	1.78185	1.54578	2.95479	1.67981	1.73539	1.97301	3.18128	2.62285	3.56331	6.17508	2.8389	4.18638	6.72813	3.23333	0.695805	1.05961	0.889611	1.07309	2.65242	3.21459	1.03583	1.12743	1.02588	0.992336	0.878827	1.49472	1.34114	2.41155	2.21085	1.69589	1.20941	1.75927	2.05182
53	'Carried weapon at school'	Inf	13.9232	Inf	3.54427	6.12888	5.17276	6.8371	4.68302	3.4308	2.60072	1.9391	2.42293	2.77164	3.49336	3.97615	3.81799	3.48546	7.22382	3.33327	3.40244	3.81802	9.16517	4.72075	7.28718	10.8225	5.77176	6.92239	12.3643	6.50787	0.732334	0.989633	0.980536	0.837593	2.34772	2.52724	1.14688	1.2178	1.13037	0.768753	0.906481	1.29214	1.03901	4.50107	3.23992	4.90491	1.5436	3.45277	4.16885
54	'Carried a gun*'	Inf	Inf	13.9232	2.77323	5.31502	5.64767	7.26916	4.98439	3.02406	2.57815	1.2007	1.54166	1.64835	2.18568	3.04024	3.61366	3.84599	6.61244	2.87619	2.94415	3.69038	7.50515	4.49421	7.74004	11.1047	5.04351	6.49128	10.4255	6.11692	0.676756	0.676907	1.1934	0.86751	2.36382	2.30345	0.954894	0.893742	1.07181	0.733877	0.797294	1.20454	0.865864	5.46945	3.14811	5.94254	1.59379	2.48416	3.61042
55	'Carried a weapon '	Inf	Inf	Inf	2.23773	4.32196	4.67477	5.4351	3.69354	2.56499	1.83076	1.37302	1.72886	1.94827	2.24871	3.16789	2.94479	2.87429	4.74932	2.8412	2.88832	3.30301	6.19613	4.05298	5.70779	8.77461	4.1366	4.7337	8.58707	4.58053	0.797413	0.910465	1.00488	0.850156	1.74969	1.64411	0.90898	1.0145	1.10936	0.776901	0.920614	1.11266	0.823682	3.52509	2.3778	3.91177	1.49488	2.77939	3.37956
[truncated: 7 more columns]

## Sheet: 2005 Normalized OR
Question #	Questions	Carried a weapon	Carried a gun*	Carried weapon at school	Felt unsafe at school*	Been threatened at school^	Been in fight^	Injured in a fight*	Been in fight at school^	Physically injured by boyfriend/girlfriend*	Forced to have sex	Has felt sad/hopeless *	Has considered suicide ^	Made a plan to commit suicide ^	Times attempted suicide *	Days had at least 1 drink of alcohol	Drank alcohol*	Had 5+ alcoholic drinks*	Drank alcohol at school*	Smoked marijuana	Age when first tried marijuana	Used marijuana*	Used marijuana at school*	Has ever used cocaine	Has used cocaine*	Has ever used heroin	Has ever used methamphetamines	Has ever used steroids	Has ever used injected drugs	Has ever used ecstasy	Does not go to PE class+	Has not participated in sports^	Watches TV	Has fasted to lose weight *	Has taken pill to lose weight *	Has vomited to lose weight*	No fruit juice+	No fruit+	No green salad+	No potatoes+	No carrots	No vegetables+	No milk+	Does not wear seatbelt	Ridden with drunk driver *	Has driven while drinking*	Does not wear sunscreen	Has ever smoked	Has smoked*
1	'Does not wear sunscreen'	0.117148	0.209573	0.163415	-0.188576	-0.163474	0.28808	0.198017	0.151465	0.211283	-0.182109	-0.241305	-0.367998	-0.399997	-0.225608	-0.0665228	-0.23628	-0.39814	0.181624	0.279448	0.273575	0.196367	0.164793	-0.0126946	0.0657526	-0.160141	-0.232392	0	-0.262019	-0.104615	-0.278546	0.0934347	-0.338657	-0.972949	-0.562569	-0.530043	0.0437959	0.531865	0.517245	0.0159147	0.603503	0.508144	0.433089	0.990262	-0.195671	-0.131756	0.990262	0.291401	-0.0805742
2	'No milk+'	-0.496351	-0.424297	-0.161298	0.206954	-0.257999	-0.469507	-0.119745	-0.513892	0.257734	0.383267	0.0990089	0.0272009	0.119696	0.247886	-0.131837	-0.216462	-0.414647	-0.0268688	0	0.00231721	-0.145423	-0.297971	-0.199342	0.0344602	0.391823	-0.136622	-0.148913	0.505014	0.0980486	0.291851	0.553288	-0.724318	-0.561429	0.268817	0.525019	0.715057	1.03536	0.373818	0.493862	0.743994	0.797429	1.03536	0.629735	-0.0210501	-0.0858332	0.679464	0.0356832	-0.144642
3	'No vegetables+'	-0.156623	-0.0421524	0.0591313	0.269243	-0.165738	-0.122297	0.0116583	0.0448071	0.0734704	0.0169535	-0.057976	-0.0151273	-0.00824595	0.259404	-0.280722	-0.328544	-0.299527	-0.2094	-0.0831722	-0.0825366	0.0308964	0.257626	0.179478	0.553563	0.261258	-0.0279549	0.112542	0.339502	0	-0.183053	0.383856	-0.507124	-0.875449	-0.186899	0.222088	1.02635	1.80685	1.66083	1.29378	1.8911	1.8911	0.703306	0.974081	-0.10543	-0.233741	0.660396	-0.00382796	-0.0878412
4	'No carrots'	-0.214271	-0.421754	-0.23659	-0.281288	-0.411086	0.0424336	-0.440506	0.0116417	0.107696	-0.00128305	0.068319	-0.101893	-0.0625912	-0.140252	0.27901	-0.0429195	-0.178506	-0.0290616	0.228456	0.211291	0.0978106	0	-0.223784	-0.19479	-0.60078	-0.293033	-0.540103	-0.430436	-0.295126	0.159479	0.458946	0.21848	-0.491647	-0.268852	-0.292459	0.934444	1.78582	1.86268	1.31591	2.10679	2.10679	0.865565	0.256808	0.00455399	-0.0212862	0.971449	0.315898	0.110708
5	'No potatoes+'	-0.26268	-0.344874	-0.277892	0.0904169	-0.0944306	-0.0350164	-0.0223868	0.0197538	0	0.0534549	0.140001	0.178458	0.181311	0.0643718	-0.0233086	-0.243264	-0.369317	0.00371132	0.106849	0.104846	-0.0171971	-0.17715	-0.0751041	-0.041472	-0.26152	-0.21374	-0.241354	0.0205461	-0.0959662	0.352494	0.652505	-0.219692	-0.0704977	0.0767374	0.249791	1.04085	1.33209	1.26023	1.70593	1.51236	1.70593	0.811888	0.313245	-0.0738873	-0.26631	0.580316	0.105304	-0.127221
6	'No green salad+'	0.115414	0.0657303	0.142476	0.00255396	-0.0244582	0.0679174	0.0548047	0.0506426	0.109131	-0.0223787	-0.0225631	-0.0849769	0	-0.145255	-0.157198	-0.404998	-0.51612	-0.355823	0.0470256	0.0381926	-0.0303016	0.122005	-0.0731891	-0.0639866	0.015465	-0.27779	-0.46392	-0.187813	-0.270751	0.178849	0.481869	0.0982334	-0.685832	-0.469751	-0.380583	1.07428	1.86231	1.93715	1.1244	1.9233	1.93715	0.556013	0.165343	-0.135154	-0.382106	0.945814	0.120052	-0.150644
7	'No fruit+'	-0.167531	-0.350374	0.0959736	-0.0152675	-0.363209	-0.26654	-0.084331	-0.0652198	0.145811	0.165726	0.0528582	0.0990466	0.148244	0.190615	-0.121609	-0.351584	-0.451524	-0.139009	-0.0510251	-0.0505235	-0.144128	0	-0.0136269	0.132063	0.392758	0.0905503	0.119792	0.578159	-0.0789196	0.23478	0.780537	-0.354522	-0.855705	-0.196797	0.288671	1.67902	1.92917	1.70832	1.04226	1.69246	1.92917	1.06357	0.843774	-0.186844	-0.158254	0.806445	0.0201217	-0.0741712
8	'No fruit juice+'	-0.188462	-0.117369	0.146936	0	-0.211957	-0.374353	-0.380567	-0.22504	0.017195	-0.0821875	0.118077	0.278628	0.358281	0.292001	-0.206497	-0.292336	-0.261007	-0.00426027	-0.301294	-0.309402	-0.371836	-0.0182608	0.107162	0.408175	0.70475	0.195081	0.24877	0.605333	0.0627109	0.248261	0.643612	-0.531833	-0.264615	0.309048	0.359101	1.81654	1.81654	1.05781	0.888547	0.9786	1.2862	0.880785	0.618808	-0.189147	-0.187216	0.455899	-0.0260396	-0.093149
9	'Has vomited to lose weight*'	-0.641176	-0.154688	-0.0209214	0.326151	0.276161	-0.697317	0.39073	-0.339106	0.420089	0.629122	0.670579	0.980799	0.831084	1.50883	0.166524	-0.0535085	0.119961	0.659282	-0.158247	-0.156909	-0.214837	0.164453	0.663008	1.08801	2.05184	1.14955	1.38281	2.1753	1.10997	-1.23911	-1.40405	-2.11197	0.184474	2.18855	2.18855	-0.948601	-0.881509	-1.70475	-1.21021	-1.556	-0.825762	-0.616955	-0.0499306	-0.129382	-0.0216557	-1.42564	0.0459061	0.236797
10	'Has taken pill to lose weight *'	-0.671103	-0.237082	-0.246942	-0.0708901	0	-0.699054	0.228264	-0.424399	-0.17715	0.312616	0.080633	0.337885	0.343236	0.707163	0.561721	0.0137461	0.0311606	0.335798	-0.256938	-0.243332	-0.215837	0.152329	0.394788	0.698104	1.56216	0.9746	1.39529	1.61667	0.735934	-1.50778	-1.37423	-1.64736	0.431524	2.06883	2.06883	-1.11837	-1.48669	-1.91364	-1.50298	-1.65211	-1.35447	-0.992873	-0.107778	-0.324431	-0.0683485	-1.57789	0.217683	0.114258
11	'Has fasted to lose weight *'	-0.156085	-0.126932	-0.177563	0.179893	0.0532567	0.0712977	-0.135239	0.0485903	0.00305305	0.180077	0.354001	0.531701	0.401824	0.412392	0.411914	0.350559	0.292736	0.233214	-0.0114446	-0.0185319	-0.0913059	0.0145328	0.104628	-0.159931	-0.211436	0.251143	0.272111	-0.0979294	0	-0.353646	-0.399741	0.340218	1.98784	1.98784	1.62107	-0.135718	-0.589285	-0.573401	-0.0938989	-0.318593	-0.4867	-0.266804	-0.451171	0.208766	0.0814021	-0.431949	0.163461	0.118209
12	'Watches TV'	0.173239	0.421293	0.137861	-0.00253533	-0.163553	0.265552	-0.149705	0.248254	-0.375822	-0.57346	-0.290898	-0.1927	-0.327651	-0.358649	0.615456	0.377594	0.286583	0.433462	0.145385	0.151085	0.203629	0.226752	-0.324844	-0.0567974	-0.761562	-0.474063	-0.174857	-0.463699	-0.482639	-0.465658	-0.113544	0.615456	0.428321	-0.00294545	-0.587272	-0.314833	0	0.298767	-0.154991	0.479636	-0.0302731	-0.34159	-0.307453	0.345161	0.48753	0.290446	0.336935	-0.0724899
13	'Has not participated in sports^'	-0.266874	-0.694521	-0.146585	-0.0480161	-0.537431	-0.4523	-0.420748	-0.606251	-0.015622	0.204016	0.46989	0.354257	0.358999	0.349538	0.0404312	-0.150089	-0.297608	-0.259562	0.10055	0.090816	0.15002	-0.0944312	0.278468	0.183806	-0.0547129	0.37504	-0.496329	-0.329272	0	0.896208	0.896208	-0.411313	-0.609407	-0.0275782	-0.177121	0.562844	0.837291	0.384633	0.419438	0.422335	0.562939	0.638247	0.146157	-0.15351	-0.370191	0.424769	0.328167	0.463983
14	'Does not go to PE class+'	-0.305731	-0.542423	-0.428557	-0.502375	-0.440991	-0.438102	-0.637865	-0.667134	0.139555	0.17104	0.154581	0.126462	0.0368542	-0.0949779	0.122238	0.0209735	0.033524	-0.213965	0.122324	0.116148	0	-0.412051	0.190816	-0.0259344	-0.419256	-0.0286275	-0.651741	-0.620142	-0.0685643	1.04863	1.04863	-0.611007	-0.410892	-0.0087134	0.140246	0.319913	0.443953	0.234034	0.271846	0.275287	0.148449	0.52923	-0.273872	-0.081072	0.204253	0.205208	0.0708705	0.23279
15	'Offered drugs at school ^'	0.0265115	0.089349	0.35909	-0.639875	0.208602	-0.0525191	0.0321228	-0.0661127	-0.23363	-0.262909	-0.374592	-0.0530616	-0.107147	0	0.452845	0.0734041	-0.0107899	0.857407	0.478941	0.475769	0.494221	1.74605	0.99055	1.22943	1.10813	0.819791	0.527612	1.16858	0.834838	-1.44179	-1.42193	-1.38206	-1.06249	-0.119908	-0.00442727	-1.60481	-1.42441	-1.28695	-1.42314	-1.23218	-1.25039	-1.44583	-0.417588	-0.195989	0.0619636	-0.995155	0.167519	0.138811
16	'Has ever used ecstasy'	-0.272941	0.144348	0.233728	-0.775438	-0.162397	-0.167583	0.32523	-0.371005	-0.719335	-0.233896	-1.04925	-0.663226	-0.581539	0.00357896	1.5869	0.679468	0.549061	0.279585	1.73592	1.75682	0.897516	1.02917	2.27754	2.31333	3.40276	2.46331	1.41251	3.2108	3.40276	-2.55789	-2.33691	-3.11731	-2.54657	-0.254322	0	-2.35496	-2.35907	-2.70489	-2.66594	-2.66864	-2.15782	-2.1539	0.0109459	-0.476089	0.375739	-2.11019	1.04141	0.787833
17	'Has ever used injected drugs'	-0.182716	0.0971679	0.343228	-0.534677	-0.0569467	-0.305988	0.320962	-0.316313	-0.682195	-0.169878	-1.56525	-0.839575	-0.650991	0.418281	0.28294	0.0156519	-0.159693	0.680963	0.712724	0.789585	0.124347	0.941125	2.47301	2.36289	5.15173	2.85169	2.7261	5.15173	2.39437	-3.92589	-3.4826	-3.9148	-3.46093	-0.190009	0.248905	-2.62877	-2.51842	-3.43838	-3.36585	-3.62038	-2.63475	-2.56336	0.376585	-1.21365	-0.197221	-3.08402	0.248424	0.297083
18	'Has ever used steroids'	-0.307984	0.147551	0.240318	-0.485248	0.101556	-0.31811	0.358329	-0.235953	-0.624379	-0.182459	-1.27092	-0.5626	-0.541392	0.161058	0.475871	0.0240912	-0.105188	0.349482	0.22233	0.27393	0.0365011	0.620721	1.03842	1.40667	3.01534	1.53286	3.46003	3.46003	1.33002	-3.22356	-2.91573	-2.89203	-2.35696	0.322542	0.190346	-2.2514	-2.24286	-2.98056	-2.89382	-2.99612	-2.12778	-2.48336	0.259613	-0.851537	-0.0273539	-2.08807	0.192045	0
19	'Has ever used methamphetamines'	-0.459586	-0.173601	0.0209825	-1.0027	-0.457619	-0.577321	-0.115583	-0.503754	-0.83882	-0.143001	-0.827216	-0.423629	-0.40388	0.152925	1.9596	0.418525	0.417682	0.502255	2.03919	2.05788	0.836542	0.937464	3.19965	2.85179	3.89385	3.89385	1.57579	3.62855	2.42374	-2.55753	-2.00144	-3.14831	-2.335	-0.05523	0	-2.26217	-2.22918	-2.75151	-2.82329	-2.70612	-2.22535	-2.42814	0.105361	-0.560602	0.121183	-2.27754	1.40501	0.933546
20	'Has ever used heroin'	-0.145356	0.194408	0.157269	-0.652232	-0.175108	-0.191451	0.373779	-0.503755	-0.848736	-0.358948	-1.44431	-0.940028	-0.574085	0.331108	0	0.075458	-0.146273	0.583308	1.74387	1.8127	0.501398	0.875825	3.35636	2.68983	5.15792	3.12319	2.2876	5.15792	2.59253	-3.71882	-3.20185	-4.20647	-3.56824	-0.238334	0.131629	-2.52316	-2.69763	-3.22891	-3.64173	-3.78453	-2.7068	-2.67036	0.0156883	-1.2952	-0.35561	-2.97595	0.398761	0.535881
21	'Has used cocaine*'	-0.0794038	0.360004	0.273023	-0.759118	-0.273609	-0.133212	-0.0959695	-0.271933	-0.806069	-0.289957	-1.05886	-0.796576	-0.651755	-0.0556968	2.67369	1.40469	1.24365	0.80654	2.76037	2.77433	2.2762	1.59905	3.37619	3.37619	3.37619	2.76748	1.36529	3.05544	2.18945	-2.63914	-2.27698	-2.81535	-2.83038	-0.416032	-0.145838	-2.13338	-2.27197	-2.62201	-2.73533	-2.69219	-1.72814	-2.34137	0.200348	-0.111699	0.694234	-2.0637	1.62408	1.71968
22	'Has ever used cocaine '	-0.16218	-0.0130933	0.0578529	-0.790026	-0.373897	-0.313781	-0.0562431	-0.456256	-0.78839	-0.282521	-0.881517	-0.45636	-0.458919	0.0557251	3.34576	0.849289	0.942858	0.696728	2.6793	2.68647	1.19957	1.41848	4.45389	4.45389	4.45389	3.52652	1.40821	3.57673	2.56483	-2.01122	-1.77114	-2.67222	-2.15465	-0.308174	-0.159671	-2.02322	-2.00648	-2.22004	-2.35778	-2.31001	-1.69105	-2.16399	-0.0244201	0	0.647655	-1.73097	2.02458	1.39175
23	'Used marijuana at school*'	0.144696	0.421211	0.709491	-0.817063	-0.325971	-0.191822	0	-0.204207	-0.839017	-0.949794	-1.4848	-1.32376	-0.973359	-0.608674	1.7869	0.65963	0.509096	1.43139	1.7869	1.7869	1.7869	1.7869	1.11297	1.70472	1.66784	0.958823	0.685002	1.73934	1.01095	-2.91959	-2.44955	-2.42614	-2.55025	-0.856142	-0.963735	-2.45415	-2.29837	-2.33035	-2.76534	-2.39173	-1.91841	-2.56813	-0.47566	-0.296027	0.0323218	-1.85899	0.39445	0.65356
24	'Used marijuana*'	-0.13335	0.0266386	0.0756923	-0.876733	-0.604482	-0.138542	-0.0758806	-0.386207	-0.512088	-0.599445	-1.11573	-0.97952	-0.936832	-0.5638	2.27293	1.38251	1.10755	0.766371	3.0114	3.0114	3.0114	3.0114	1.5236	3.0114	1.92296	1.48744	0.730322	1.5521	1.50884	-1.878	-1.57556	-1.81972	-2.02655	-0.594768	-0.713485	-2.17819	-1.81296	-1.85312	-1.97585	-1.66438	-1.5156	-1.78604	-0.633111	0.0211972	0.746031	-1.19788	1.44175	1.70133
25	'Age when first tried marijuana'	-0.181866	-0.154244	0.0544727	-0.916833	-0.58998	-0.0604791	0	-0.295542	-0.274031	-0.207104	-0.874873	-0.705437	-0.759263	-0.362415	2.61598	0.99675	1.16051	1.05	3.65457	3.65457	3.65457	3.65457	3.15553	3.65457	3.37929	2.85381	1.11279	2.36237	2.51318	-1.61682	-1.48973	-1.72723	-1.80874	-0.477228	-0.510522	-1.97072	-1.57432	-1.63959	-1.70877	-1.40587	-1.484	-1.49327	-0.593453	0.00337542	1.13702	-0.975637	2.04337	2.03935
26	'Smoked marijuana'	-0.18603	-0.168371	0.0444076	-0.944229	-0.607315	-0.0495644	0	-0.285544	-0.274238	-0.19685	-0.855225	-0.686954	-0.743934	-0.351293	2.61988	1.01548	1.18208	1.0457	3.66018	3.66018	3.66018	3.66018	3.16793	3.66018	3.33003	2.85469	1.08075	2.30508	2.51185	-1.59108	-1.46043	-1.71336	-1.78209	-0.471269	-0.492295	-1.94304	-1.55525	-1.61119	-1.6872	-1.36914	-1.46507	-1.47602	-0.59087	0.00835368	1.15753	-0.950198	2.07214	2.06636
27	'Has driven while drinking*'	-0.326406	0.276853	0	-1.53219	-0.913151	-0.867975	-0.562202	-1.17421	-0.793719	-1.08464	-1.76955	-1.4517	-1.43167	-1.27243	2.02827	2.02827	2.02827	0.61554	0.555835	0.554885	0.308935	0.224765	0.53459	0.992344	0.628853	0.334986	0.229371	0.793434	0.549968	-2.11084	-2.53287	-1.97292	-2.29094	-0.884376	-0.9574	-2.43066	-2.26418	-2.64202	-2.66205	-2.22058	-2.21734	-2.16355	0.0786882	0.723494	2.02827	-1.9631	0.432147	0.523867
28	'Ridden with drunk driver *'	-0.153129	0.251733	0.293204	-0.258155	0	-0.161226	0.193542	-0.412279	-0.274422	-0.20712	-0.575829	-0.595032	-0.635293	-0.401596	1.20269	1.03104	0.962582	0.922297	0.298132	0.312719	0.475575	0.787891	0.778409	1.07788	0.580733	0.544675	0.296663	0.668484	0.589614	-1.50469	-1.42471	-1.22381	-1.2721	-0.248984	-0.173651	-1.54112	-1.40129	-1.50359	-1.57816	-1.30326	-1.19755	-1.20729	-0.36086	1.61497	1.61497	-1.13554	0.199264	0.446599
29	'Does not wear seatbelt'	0.369507	1.00324	0.722115	-0.17819	0.423741	-0.0770466	0.469122	0.0783002	0.0344608	-0.0441268	-1.03156	-0.764562	-0.889931	0.107854	-0.942213	-0.192068	0.106538	0.604978	-0.346493	-0.329511	-0.224133	0.562857	0.708588	1.34453	1.84623	1.16524	1.36241	2.21331	1.03125	-1.7429	-1.17045	-1.92183	-1.97744	-0.0777317	-0.139601	-0.778564	-0.416076	-1.2485	-1.23643	-1.09641	-0.16344	-0.601909	2.21331	-0.406261	0.924762	0.00499299	-0.250146	0.151724
30	'Drank alcohol at school*'	0.0274027	0.504866	0.632445	-0.657262	-0.0676002	-0.432727	0.135135	-0.189684	-0.569084	-0.474863	-1.04272	-0.770442	-0.591637	-0.337377	1.74553	1.74553	1.19827	1.74553	0.517909	0.541778	0.403185	1.69774	0.657572	1.17856	1.64168	0.789967	0.680117	1.74553	0.527724	-2.45515	-2.34833	-1.95307	-2.06522	-0.406319	-0.202552	-2.1738	-2.17102	-2.54183	-2.31812	-2.15444	-2.11908	-2.03068	-0.167186	0.104733	0.68945	-1.57581	0.169179	0.0721455
31	'Had 5+ alcoholic drinks*'	-0.0314856	0.388664	0.246658	-0.926357	-0.522244	-0.207463	-0.0407849	-0.506672	-0.467911	-0.50253	-0.875132	-0.571098	-0.721573	-0.396801	2.7678	2.7678	2.7678	1.86389	1.31992	1.31792	1.40999	1.44108	1.56933	2.28129	1.57772	1.37102	0.891072	1.5705	1.46282	-1.54204	-1.72075	-1.43433	-1.34007	-0.0453314	-0.0762478	-1.76492	-1.81791	-2.0365	-2.02553	-1.63826	-1.54359	-1.75283	0	0.810643	2.7678	-1.48995	1.15005	1.62577
32	'Drank alcohol*'	0	0.295298	0.374647	-0.724787	-0.545326	-0.184755	-0.210527	-0.578057	-0.335791	-0.358844	-0.761456	-0.523288	-0.585374	-0.357594	2.43887	2.43887	2.43887	2.43887	1.14985	1.15068	1.68148	1.58814	1.47229	2.43887	1.79598	1.36839	1.01688	1.74237	1.58976	-1.55806	-1.5767	-1.34679	-1.28572	-0.0662178	-0.253189	-1.79972	-1.72144	-1.92885	-1.90295	-1.50615	-1.57608	-1.55812	-0.302078	0.87563	2.43887	-1.33156	0.848907	1.69495
33	'Days had at least 1 drink of alcohol'	-0.170472	-0.229809	0.15738	-1.20101	-0.645405	-0.308844	-0.594247	-0.619348	-0.194823	0	-0.638071	-0.393919	-0.417348	-0.0627865	3.69293	3.69293	3.69293	3.69293	2.47842	2.49408	2.29607	2.43958	3.69293	3.43203	1.4447	2.63364	1.19283	1.73383	2.22137	-1.73262	-1.66201	-1.38476	-1.50019	0.205928	-0.308986	-1.98971	-1.7673	-1.95688	-1.95882	-1.46004	-1.80408	-1.74932	-1.32805	0.771449	3.69293	-1.43763	1.71161	2.44346
34	'Smoked cigars*'	0.164308	0.434609	0.238941	-0.970617	-0.508604	-0.342554	0	-0.640187	-0.812306	-0.781794	-1.22296	-1.06228	-1.02644	-0.810469	2.36953	1.16748	0.851325	0.454731	1.38834	1.3942	1.1755	1.0719	0.767391	1.22791	1.4498	0.598106	0.733366	1.27179	0.687554	-2.05429	-2.00298	-1.89991	-2.10007	-0.666331	-0.778414	-2.42459	-2.15046	-2.10489	-2.48671	-2.12715	-1.80267	-2.17618	-0.564937	-0.347575	0.558305	-1.56489	1.92688	2.30618
35	'Has used snuff at school*'	0.805197	0.744509	0.820255	-1.08817	-0.315572	-0.356539	-0.0310095	-0.430541	-0.656388	-0.965943	-1.96066	-1.36941	-1.39193	-0.990719	1.29104	0.900703	0.788852	0.736853	0.322271	0.319551	0	0.364324	0.452945	0.918543	1.66444	0.577466	1.2069	1.56512	0.315254	-2.64034	-2.75531	-1.82957	-2.29637	-0.53326	-0.882209	-2.16739	-2.18908	-2.47977	-2.94176	-2.36803	-2.0651	-2.74448	0.502494	-0.620618	0.621371	-1.79869	1.10663	1.01278
36	'Used snuff*'	0.712984	0.743732	0.747722	-0.752046	-0.339151	-0.213473	0.0559035	-0.328436	-0.68553	-0.822438	-1.72779	-1.11509	-1.12969	-0.7692	1.34723	0.979921	0.96396	0.519054	0.29589	0.302029	0	0.255625	0.535615	1.05881	1.95482	0.693741	1.32762	1.89325	0.510944	-2.2557	-2.60289	-1.75202	-2.08869	-0.386577	-0.639868	-1.98502	-1.9877	-2.27161	-2.71395	-2.1743	-1.93635	-2.46435	0.443675	-0.447444	0.796836	-1.64069	1.13826	1.16386
37	'Has ever smoked cigarettes daily'	-0.148067	-0.0351111	0.159201	-0.91801	-0.338457	-0.278959	0	-0.529672	-0.407456	0.0430917	-0.582308	-0.362875	-0.402222	-0.121559	2.59701	0.798669	0.922716	0.236571	2.29341	2.29156	1.22704	0.770668	1.70309	1.73139	1.70424	1.74332	0.686775	1.58098	1.54469	-1.48507	-0.850508	-2.28037	-1.98892	-0.0733219	-0.166374	-1.52468	-1.40321	-1.74702	-1.99642	-1.53738	-1.50512	-1.57002	0.305009	-0.207394	0.687406	-1.19312	3.80835	3.80835
38	'Smoked cigarettes at school*'	-0.0541009	0.133068	0.552239	-0.703694	-0.222428	-0.101958	0.162155	-0.300105	-0.657681	-0.486284	-0.942513	-0.659375	-0.586934	-0.336306	1.82203	1.16919	0.724153	0.962728	1.8818	1.88542	1.50922	1.91763	1.11723	1.51601	1.58272	1.09153	0.475781	1.50435	1.04044	-2.28874	-1.7924	-2.36115	-2.40329	-0.698519	-0.410999	-2.24104	-2.12049	-2.25102	-2.38774	-2.09202	-1.73962	-2.2393	0	-0.171364	0.477489	-1.73011	2.61038	2.61038
39	'Has smoked*'	-0.0157058	0.0796235	0.287106	-0.735637	-0.351228	-0.226046	0	-0.542009	-0.577501	-0.288977	-0.682974	-0.351737	-0.412309	-0.0590298	2.50491	1.48057	1.40792	0.519921	1.98635	1.97891	1.78592	1.36769	1.80037	2.53947	2.04203	1.66903	0.778411	1.80942	1.48375	-1.56062	-1.17701	-2.01125	-1.73245	-0.180083	-0.177262	-1.81491	-1.65841	-1.88887	-2.00128	-1.5669	-1.54975	-1.70067	-0.172664	0.0768109	1.04555	-1.39023	3.78172	3.78172
40	'Has ever smoked'	-0.158599	-0.320612	0.154384	-0.818393	-0.497518	-0.227205	-0.0997933	-0.367903	-0.384774	0.13233	-0.647301	-0.369788	-0.421311	0	1.91224	0.773701	1.07137	0.756127	2.1313	2.1221	1.66551	1.24775	2.57238	2.58305	2.04408	2.27967	1.10963	1.89994	1.8765	-1.58337	-1.17365	-1.46265	-1.54802	0.0625139	-0.22898	-1.60863	-1.42494	-1.479	-1.62958	-1.22253	-1.32656	-1.38118	-0.435362	-0.0313528	1.09301	-0.879085	2.58305	2.58305
41	'Times attempted suicide *'	-0.289576	-0.33059	0.345943	0.56461	0.622807	-0.0920263	0.784392	0	0.251933	1.02728	1.69586	4.46322	3.62766	4.46322	0.312533	-0.258102	-0.300781	0.424267	-0.117435	-0.108991	-0.165341	0.419324	0.778214	1.07797	2.15113	1.20228	1.25334	2.24449	1.01336	-1.57452	-0.977585	-1.98354	-1.1244	0.726691	1.40865	-1.11589	-1.07975	-1.56961	-1.49582	-1.50399	-0.888636	-0.994277	0.0973349	-0.457516	-0.436878	-1.2214	0.174697	0.254839
42	'Made a plan to commit suicide ^'	-0.111942	-0.353112	0.396604	0.28298	0.67625	-0.0500688	0.444959	0	0.447273	0.956417	1.87295	4.30128	4.30128	4.01219	0.342509	-0.101345	-0.241016	0.554545	-0.125539	-0.121302	-0.153836	0.439177	0.648108	0.866446	1.63047	1.03001	0.935425	1.55976	0.812782	-1.05815	-0.583586	-1.568	-0.750427	0.747301	1.11543	-0.665073	-0.737588	-1.03982	-0.994341	-1.04179	-0.771749	-0.73793	-0.515913	-0.306675	-0.211576	-1.01125	0.137923	0.286097
43	'Has considered suicide ^'	-0.245053	-0.410396	0.241875	0.106289	0.486616	-0.0505941	0.428441	-0.0581424	0.386698	1.04449	2.12951	4.88701	4.34054	4.88701	0.405197	0	-0.0512819	0.415	-0.0292992	-0.0282167	-0.157264	0.128032	0.689926	0.760884	1.30379	1.04953	0.953476	1.41043	0.770354	-0.929284	-0.549069	-1.39379	-0.58129	0.781209	1.30441	-0.705467	-0.747525	-1.08554	-0.957935	-1.04183	-0.739371	-0.791166	-0.351285	-0.227155	-0.192353	-0.93999	0.228705	0.385929
44	'Has felt sad/hopeless *'	-0.387465	-0.580939	0.11057	0.817828	0.620593	-0.0555935	0.455823	-0.101122	0.504666	1.05599	2.31957	2.31957	2.10226	2.30972	0.351105	-0.0481092	-0.165256	0.332785	-0.00751098	-0.00759368	-0.103412	0.157056	0.454828	0.68866	0.989561	0.835997	0.435219	0.874816	0.574393	-0.711105	-0.243376	-1.30193	-0.568931	0.714016	1.18425	-0.675958	-0.603655	-0.833065	-0.806333	-0.681559	-0.59216	-0.529298	-0.428227	-0.0178923	-0.320138	-0.623238	0.141252	0.244751
45	'Ever had sex '	-0.471192	-0.0116459	-0.141535	-0.738524	-0.621038	-0.289943	0.430467	-0.333752	0.436677	1.60341	-0.872874	-0.869725	-0.792208	-0.357109	0.732155	0.115681	0.266938	0.309361	1.02952	1.02926	0.658726	0.812023	0.987037	1.57729	1.66339	0.874645	0.444213	1.91877	1.6845	-1.40695	-1.59827	-1.79714	-1.90682	-0.578882	-0.73775	-1.99215	-1.37214	-1.58251	-1.78357	-1.2617	-1.29568	-1.13437	0	-0.467387	0.723011	-0.776656	0.50559	0.540025
46	'Forced to have sex '	-0.611123	-0.117226	-0.104652	0.188112	0.35769	-0.309498	0.498609	-0.305742	1.13926	1.83753	0.417244	0.5958	0.546988	1.00239	0.350428	-0.284245	-0.431403	0.261889	0.0121161	0.0214277	-0.225878	0.0533124	0.415076	0.818815	1.43618	0.881465	0.884928	1.63144	0.750995	-1.33339	-1.148	-2.22324	-1.3816	0.307251	0.50404	-1.51497	-1.12953	-1.47163	-1.53163	-1.38991	-1.15598	-0.883789	-0.0795379	-0.287932	-0.273973	-1.20279	0.282134	0
47	'Physically injured by boyfriend/girlfriend*'	-0.0338184	0.203713	0.385772	0.177058	0.382776	-0.0172104	0.64644	-0.0880096	1.23005	1.23005	-0.0432896	0.0288011	0.128636	0.317833	0.246397	-0.1704	-0.305991	0.258461	0.0255202	0.0452935	-0.0477297	0.254881	0	0.393496	1.03718	0.276438	0.533801	1.20992	0.356349	-1.27409	-1.27684	-1.93481	-1.46784	-0.0917222	0.3858	-1.3248	-1.05866	-1.24933	-1.49429	-1.19014	-1.00867	-0.918529	0.0898422	-0.264442	0.107736	-0.718605	-0.144177	-0.197731
48	'Been in fight at school^'	0.580239	1.01265	0.922677	0.349238	1.04393	2.10032	2.10032	2.10032	0	-0.12694	-0.561068	-0.328029	-0.230627	0.15391	-0.0901186	-0.324656	-0.256742	0.725871	0.102224	0.111792	0.166162	0.977701	0.420143	1.01564	1.47017	0.699514	1.01024	1.66381	0.792689	-1.99277	-1.77946	-1.22273	-1.33429	-0.250962	-0.285386	-1.47902	-1.18168	-1.21981	-1.38653	-1.19818	-0.949323	-1.60215	0.221691	-0.314289	-0.184743	-0.690413	-0.0392959	-0.0742303
49	'Injured in a fight*'	0.669764	1.08925	1.00084	0.939851	1.19135	1.87993	1.87993	1.63254	0.26667	0.209632	-0.471902	-0.309225	-0.253447	0.470523	-0.532796	-0.424904	-0.258634	0.582911	-0.0800106	-0.0604451	0.00870891	0.714129	0.352377	0.723825	1.87993	0.619905	1.13674	1.8333	1.02114	-2.43128	-2.06174	-2.08846	-1.9859	-0.0660778	-0.0233279	-2.10233	-1.66857	-1.68342	-1.89645	-2.11811	-1.45025	-1.67578	0.144734	-0.176246	-0.0405157	-1.11164	-0.238965	0
50	'Been in fight^'	0.797148	1.06991	0.943188	0.0593188	0.814012	1.65949	1.65949	1.65949	-0.0521857	-0.253681	-0.638525	-0.443466	-0.403681	-0.0611014	0.0974011	-0.0543387	-0.0805183	0.359842	0.215219	0.22387	0.290841	0.867101	0.439634	1.03138	1.65949	0.502961	0.805094	1.55115	0.873126	-1.88672	-1.7485	-1.32841	-1.43457	-0.648602	-0.766582	-1.75132	-1.50598	-1.32552	-1.56428	-1.29038	-1.23941	-1.68074	-0.0566406	-0.186221	-0.00149552	-0.676783	-0.0215836	0.118748
51	'Been threatened at school^'	0.590195	0.888582	1.09413	1.48349	1.70644	0.720268	1.4424	0.827197	0.254057	0.319763	-0.0560817	0	0.228894	0.559988	-0.332904	-0.508653	-0.489044	0.631225	-0.436276	-0.399375	-0.268843	0.639208	0.285774	0.797236	1.58209	0.528919	1.13102	1.70644	0.784568	-1.98335	-1.92737	-1.85126	-1.54635	-0.0432915	0.113153	-1.68267	-1.6964	-1.51163	-1.71744	-1.83764	-1.3766	-1.56298	0.350403	-0.118738	-0.140415	-1.22208	-0.38564	-0.100178
52	'Felt unsafe at school*'	0.0208741	0.330404	0.684326	1.86382	1.86382	0.345902	1.57123	0.512836	0.428666	0.530512	0.52148	0	0.215951	0.882118	-0.508184	-0.307787	-0.512829	0.42189	-0.392862	-0.345901	-0.160767	0.528444	0.249971	0.692054	1.48529	0.364168	0.924539	1.60904	0.551854	-1.66441	-1.05763	-1.30992	-1.03939	0.266145	0.54347	-1.09038	-0.968128	-1.1043	-1.15226	-1.32751	-0.561289	-0.717701	0.128799	0.00343375	-0.379125	-0.866856	-0.326188	-0.10426
53	'Carried weapon at school'	1.97393	1.97393	1.97393	0	0.790133	0.545445	0.947894	0.401949	-0.0469455	-0.446578	-0.870104	-0.548739	-0.354751	-0.0208742	0.165883	0.107321	-0.0241402	1.02727	-0.0885515	-0.058921	0.107333	1.37067	0.413525	1.03987	1.61047	0.703522	0.96578	1.80262	0.876694	-2.27492	-1.84052	-1.85385	-2.08117	-0.594232	-0.487928	-1.62777	-1.54121	-1.6487	-2.2049	-1.96714	-1.45573	-1.77028	0.344778	-0.129533	0.468737	-1.19919	-0.0377369	0.234158
54	'Carried a gun*'	2.09338	2.09338	2.09338	-0.234476	0.704029	0.791611	1.15574	0.611371	-0.10956	-0.339706	-1.44217	-1.08156	-0.985021	-0.577963	-0.101861	0.147417	0.237312	1.01914	-0.181885	-0.148192	0.177725	1.20184	0.462024	1.2463	1.76705	0.628384	0.992458	1.67601	0.90676	-2.26934	-2.26902	-1.45097	-1.91109	-0.464926	-0.50225	-1.77263	-1.86811	-1.606	-2.15244	-2.03286	-1.43756	-1.91383	0.74535	-0.0515588	0.865036	-1.03359	-0.393287	0.14612
55	'Carried a weapon '	1.6031	1.6031	1.6031	-0.368192	0.581456	0.694666	0.912075	0.354772	-0.171276	-0.657789	-1.07288	-0.740407	-0.568037	-0.361134	0.133291	0.0279337	-0.00702369	0.71749	-0.0237288	0	0.193551	1.10114	0.488751	0.982703	1.6031	0.518214	0.712738	1.57194	0.665285	-1.85683	-1.66555	-1.52321	-1.76443	-0.723133	-0.812923	-1.66791	-1.50946	-1.3805	-1.89443	-1.64956	-1.37622	-1.81007	0.287431	-0.280606	0.437591	-0.950198	-0.0554596	0.226606
[truncated: 7 more columns]

## Sheet: 2003 Raw OR
Question #	Questions	Carried a weapon	Carried a gun*	Carried weapon at school	Felt unsafe at school*	Been threatened at school^	Been in fight^	Injured in a fight*	Been in fight at school^	Physically injured by boyfriend/girlfriend*	Forced to have sex	Has felt sad/hopeless *	Has considered suicide ^	Made a plan to commit suicide ^	Times attempted suicide *	Days had at least 1 drink of alcohol	Drank alcohol*	Had 5+ alcoholic drinks*	Drank alcohol at school*	Smoked marijuana	Age when first tried marijuana	Used marijuana*	Used marijuana at school*	Has ever used cocaine	Has used cocaine*	Has ever used heroin	Has ever used methamphetamines	Has ever used steroids	Has ever used injected drugs	Has ever used ecstasy	Does not go to PE class+	Has not participated in sports^	Watches TV	Has fasted to lose weight *	Has taken pill to lose weight *	Has vomited to lose weight*	No fruit juice+	No fruit+	No green salad+	No potatoes+	No carrots	No vegetables+	No milk+	Does not wear seatbelt	Ridden with drunk driver *	Has driven while drinking*	Does not wear sunscreen	Has ever smoked	Has smoked*
1	'Does not wear sunscreen'	1.46181	1.71109	1.58016	1.13943	1.17631	1.38576	1.32665	1.54992	1.50596	1.32642	1.09343	0.979199	1.09246	1.18172	0.936242	0.981375	0.934445	1.33407	1.33788	1.34036	1.37239	1.45669	1.13594	1.2312	1.10624	1.08808	0.983457	1.1547	0.986142	1.22278	1.48395	0.89095	1.04786	0.94065	0.856326	1.58794	2.0689	2.0932	1.70612	2.05038	2.1741	1.81444	2.42084	1.22431	1.20402	Inf	1.39736	1.17481
2	'No milk+'	0.883365	0.955766	1.00228	1.30321	0.996989	0.954514	1.04051	1.06109	1.28706	1.40185	1.28265	1.35225	1.14761	1.4883	0.999658	1.04863	1.02553	1.16216	1.11978	1.12686	1.10069	1.14142	1.14684	1.34514	1.63719	1.16499	1.10424	1.45446	1.02179	1.41046	1.79245	0.65681	1.65525	1.49931	1.69163	2.21112	2.55212	1.72765	1.94533	2.01203	2.29464	Inf	1.44933	1.11988	1.04617	1.81444	1.16075	1.15021
3	'No vegetables+'	1.11382	1.30397	1.29311	1.27555	1.20058	1.00841	1.14513	1.23603	1.32195	1.33436	0.984612	0.995328	1.17794	1.12188	0.885078	0.900786	0.930601	1.30239	1.14674	1.14724	1.23149	1.42984	1.22235	1.40532	1.49708	1.03583	1.22179	1.5953	1.07201	1.22644	1.62675	0.641831	1.30214	1.11685	1.31436	2.67997	4.22572	3.77621	3.41444	4.64819	Inf	2.29464	2.27515	1.10371	1.04038	2.1741	1.22016	1.1146
4	'No carrots'	0.936834	0.832752	0.953892	0.838494	0.842337	1.01512	0.77263	1.03996	1.08483	0.94052	1.021	1.00534	0.834416	0.904479	1.12079	0.98707	0.896298	0.94723	1.19695	1.17269	1.11328	0.836674	0.918645	0.791765	0.606903	0.748065	0.657552	0.44789	0.616078	1.28083	1.58982	1.1935	1.00351	0.868814	0.769752	1.93845	3.52086	3.85444	2.79552	Inf	4.64819	2.01203	0.996539	1.10267	0.955055	2.05038	1.25085	1.09379
5	'No potatoes+'	0.818759	0.758486	0.932993	1.02533	0.88139	0.915435	0.734858	0.949523	1.1025	1.11065	1.11002	1.03418	0.983446	0.934338	0.883385	0.815676	0.751322	0.964712	0.937401	0.933041	0.882513	0.852891	0.893434	0.796851	0.766583	0.756389	0.721588	0.729073	0.749903	1.16505	1.44047	0.765656	1.13735	0.97588	1.15236	1.84122	2.51832	2.13812	Inf	2.79552	3.41444	1.94533	1.01928	0.906728	0.775515	1.70612	0.968686	0.830439
6	'No green salad+'	1.09439	1.10459	1.08157	0.947905	0.931479	1.00696	0.903391	1.12735	1.14908	0.892211	0.963014	0.984091	0.858902	0.983311	0.85459	0.756437	0.76162	0.884628	1.08392	1.05802	1.02548	0.928947	0.826251	0.852855	0.779119	0.8178	0.68313	0.698663	0.659124	1.16667	1.46419	0.968459	0.832207	0.634292	0.777885	2.04095	3.59477	Inf	2.13812	3.85444	3.77621	1.72765	1.0481	0.959101	0.840391	2.0932	1.0365	0.886528
7	'No fruit+'	1.00724	1.261	1.28829	1.1106	1.01905	0.975416	1.09198	1.05646	1.30297	1.28998	1.00747	1.15031	1.1353	1.19842	0.856631	0.761676	0.787454	1.05269	1.05055	1.04099	1.04017	1.06386	1.02235	1.08329	1.33533	1.16842	1.0667	1.42027	0.955499	1.37936	1.76435	0.60822	1.26239	1.15225	1.24232	3.87462	Inf	3.59477	2.51832	3.52086	4.22572	2.55212	1.81074	0.942451	0.92584	2.0689	1.10913	1.10002
8	'No fruit juice+'	0.964888	1.03734	1.17522	1.13939	1.06383	0.822649	0.902537	0.90015	1.09893	1.20118	1.05352	1.25893	1.57865	1.19322	0.735531	0.827844	0.908786	0.969462	0.868827	0.869531	0.886339	1.01995	1.09239	1.07693	1.52093	1.27644	1.47446	1.9577	1.22987	1.33109	1.68444	0.514489	1.41749	1.60542	1.69915	Inf	3.87462	2.04095	1.84122	1.93845	2.67997	2.21112	1.9812	0.994456	0.908626	1.58794	1.11183	1.08854
9	'Has vomited to lose weight*'	1.49897	1.96178	2.39996	3.49117	3.35838	1.63273	2.54491	1.82235	2.93222	4.7293	2.95959	3.68782	4.76456	5.87257	1.73907	2.50049	2.65276	3.59743	1.64956	1.82011	2.16966	3.53837	3.42801	4.28271	6.87483	3.88249	6.01054	9.52352	4.72719	1.0516	1.03285	0.347785	11.7776	11.4835	Inf	1.69915	1.24232	0.777885	1.15236	0.769752	1.31436	1.69163	3.26773	2.08265	2.20055	0.856326	2.74478	2.29973
10	'Has taken pill to lose weight *'	1.63639	1.84236	2.36057	2.60733	2.78893	1.73055	2.47213	1.56402	2.30309	2.87966	2.47275	2.69534	3.40664	3.57821	2.30058	3.0206	2.98501	2.67737	2.19018	2.45482	2.00505	2.5786	3.46648	4.14941	5.92969	4.391	5.33224	7.64421	4.54637	1.02195	1.1086	0.554333	7.32795	Inf	11.4835	1.60542	1.15225	0.634292	0.97588	0.868814	1.11685	1.49931	2.90792	2.26142	2.60164	0.94065	3.42121	2.71679
11	'Has fasted to lose weight *'	1.32353	1.44654	2.14001	2.85679	2.38755	1.56345	1.99309	1.53914	2.34592	3.41916	3.86919	3.63425	3.66677	4.81511	2.0429	2.06237	2.03599	2.49843	1.72918	1.77538	1.7312	2.33437	2.50442	2.70206	3.40849	3.04024	3.10364	3.49983	2.52555	0.980664	1.12729	0.681494	Inf	7.32795	11.7776	1.41749	1.26239	0.832207	1.13735	1.00351	1.30214	1.65525	1.9719	1.90085	1.63194	1.04786	1.95095	2.17587
12	'Watches TV'	1.07302	0.914581	1.07398	0.718752	0.682062	1.0243	0.806053	0.923931	0.870577	0.571665	0.926879	0.73489	0.410709	0.632157	1.98832	1.43388	1.32361	1.23382	1.35651	1.37703	1.23093	1.20178	0.914308	0.944139	0.568132	0.778916	0.511095	0.327217	0.418638	0.699322	0.736713	Inf	0.681494	0.554333	0.347785	0.514489	0.60822	0.968459	0.765656	1.1935	0.641831	0.65681	0.281653	1.22305	1.15271	0.89095	1.04437	1.20269
13	'Has not participated in sports^'	0.842364	0.717425	0.904065	1.08617	0.826207	0.765988	0.706223	0.724921	1.05419	1.33855	1.37076	1.37326	1.41555	1.44269	0.921938	0.927094	0.884272	0.962679	1.07071	1.07293	1.06494	1.00045	1.312	1.1549	1.14458	1.28145	0.827214	0.831644	1.18185	2.34191	Inf	0.736713	1.12729	1.1086	1.03285	1.68444	1.76435	1.46419	1.44047	1.58982	1.62675	1.79245	1.33653	0.969523	0.782845	1.48395	1.1932	1.25349
14	'Does not go to PE class+'	0.840517	0.768844	0.764127	0.758363	0.681966	0.717008	0.639807	0.649812	1.00308	0.950955	1.04539	1.04444	1.13811	0.872175	1.10783	1.01927	1.00174	0.766466	1.0804	1.07622	0.998351	0.726341	1.07952	0.96081	0.697431	0.99076	0.761397	0.672928	1.02285	Inf	2.34191	0.699322	0.980664	1.02195	1.0516	1.33109	1.37936	1.16667	1.16505	1.28083	1.22644	1.41046	1.00082	0.958838	1.02274	1.22278	1.1294	1.10098
15	'Offered drugs at school ^'	2.7431	2.89358	3.60672	2.10188	3.30873	2.68631	3.03885	2.608	2.33655	2.32856	1.98573	2.20356	2.79984	2.44192	2.89738	3.03097	2.962	5.91727	3.3937	3.70281	3.93813	9.82408	5.0703	6.48855	6.11342	4.98091	3.71033	4.50076	5.80426	0.964359	0.93036	0.854526	2.00497	2.28212	2.82054	0.963066	0.90504	0.896961	0.909642	0.901699	1.01363	0.981714	2.54912	2.30293	2.5538	1.15517	3.15756	2.84467
16	'Has ever used ecstasy'	3.91811	4.62343	4.89388	3.35863	4.22667	4.44203	5.21783	3.97128	3.15127	3.77687	2.26015	2.49651	5.08695	4.10694	1.98162	6.75863	5.87653	6.48509	5.53465	10.1095	7.5425	10.8978	19.9026	18.4877	37.532	19.6184	12.5139	36.5059	Inf	1.02285	1.18185	0.418638	2.52555	4.54637	4.72719	1.22987	0.955499	0.659124	0.749903	0.616078	1.07201	1.02179	7.32437	3.38808	4.33485	0.986142	12.7832	5.59393
17	'Has ever used injected drugs'	8.05252	12.9711	12.6127	7.51657	9.99899	6.21516	13.4363	8.00492	5.76997	7.42736	2.60587	4.37164	8.13456	10.3182	2.0105	5.51985	6.56494	16.5201	4.50579	6.77191	6.5192	17.6069	30.0899	28.0121	141.162	27.9542	89.8769	Inf	36.5059	0.672928	0.831644	0.327217	3.49983	7.64421	9.52352	1.9577	1.42027	0.698663	0.729073	0.44789	1.5953	1.45446	9.91111	3.91245	5.90467	1.1547	9.48032	5.02793
18	'Has ever used steroids'	4.32873	6.51617	6.66376	5.48047	6.47375	4.39153	6.53892	4.46589	3.81048	5.06001	2.32111	3.19386	4.92347	5.92758	4.35196	5.41117	6.18263	9.52187	4.46053	5.53873	5.05189	9.23147	11.2591	13.925	31.5817	12.6063	Inf	89.8769	12.5139	0.761397	0.827214	0.511095	3.10364	5.33224	6.01054	1.47446	1.0667	0.68313	0.721588	0.657552	1.22179	1.10424	5.67804	3.42	4.87645	0.983457	6.98481	4.68335
19	'Has ever used methamphetamines'	4.8335	5.50437	6.28117	4.20465	4.9376	4.63311	7.0463	4.03001	3.77159	4.63973	3.02496	3.9288	3.52676	6.62079	50.8396	10.8304	9.71945	8.59055	36.348	36.0932	11.8276	12.666	51.5382	34.5999	72.8268	Inf	12.6063	27.9542	19.6184	0.99076	1.28145	0.778916	3.04024	4.391	3.88249	1.27644	1.16842	0.8178	0.756389	0.748065	1.03583	1.16499	2.4466	4.19053	5.78502	1.08808	13.5021	11.075
20	'Has ever used heroin'	9.76305	14.9386	13.2868	9.53718	10.9992	5.79254	15.6202	6.36711	6.41087	8.08737	2.76509	4.78618	5.05191	12.5351	8.60167	9.04479	10.205	19.9951	19.4316	24.8482	14.2603	22.5943	105.26	56.9731	Inf	72.8268	31.5817	141.162	37.532	0.697431	1.14458	0.568132	3.40849	5.92969	6.87483	1.52093	1.33533	0.779119	0.766583	0.606903	1.49708	1.63719	5.42924	5.02973	8.13535	1.10624	9.23314	9.77346
21	'Has used cocaine*'	6.27621	8.82784	8.6128	5.07635	6.31016	6.00592	8.43483	4.49503	4.16317	4.89738	2.47773	3.62321	3.16719	7.02489	33.3277	23.9943	18.201	12.5148	49.4825	49.4231	26.0377	19.018	Inf	Inf	56.9731	34.5999	13.925	28.0121	18.4877	0.96081	1.1549	0.944139	2.70206	4.14941	4.28271	1.07693	1.08329	0.852855	0.796851	0.791765	1.40532	1.34514	3.22913	6.96454	9.50378	1.2312	15.4228	15.1318
22	'Has ever used cocaine '	3.75116	4.76067	5.01894	3.20253	3.93917	3.79241	5.30264	3.32831	3.05875	4.07909	2.4858	3.11394	2.92792	5.34165	29.9285	9.80068	9.6904	7.63012	34.5418	34.9196	11.224	11.7941	Inf	Inf	105.26	51.5382	11.2591	30.0899	19.9026	1.07952	1.312	0.914308	2.50442	3.46648	3.42801	1.09239	1.02235	0.826251	0.893434	0.918645	1.22235	1.14684	2.73571	5.09207	6.42536	1.13594	16.3796	10.6596
23	'Used marijuana at school*'	7.50376	10.9541	11.8066	4.18598	5.73065	6.09325	6.90644	5.85424	3.83179	3.28515	2.17348	2.73049	2.942	4.62863	22.512	14.0071	8.52046	18.3061	Inf	Inf	Inf	Inf	11.7941	19.018	22.5943	12.666	9.23147	17.6069	10.8978	0.726341	1.00045	1.20178	2.33437	2.5786	3.53837	1.01995	1.06386	0.928947	0.852891	0.836674	1.42984	1.14142	4.47043	5.65684	6.64809	1.45669	8.03551	8.44002
24	'Used marijuana*'	3.73275	4.77363	4.69781	2.21673	2.61871	3.42094	4.37133	2.83082	2.70835	2.37089	1.80672	2.07861	1.74968	2.85646	21.6789	11.3152	8.88137	7.79026	Inf	Inf	Inf	Inf	11.224	26.0377	14.2603	11.8276	5.05189	6.5192	7.5425	0.998351	1.06494	1.23093	1.7312	2.00505	2.16966	0.886339	1.04017	1.02548	0.882513	1.11328	1.23149	1.10069	2.04081	4.15852	6.1915	1.37239	8.41411	10.1451
25	'Age when first tried marijuana'	3.36936	3.62364	4.33373	1.84021	2.35734	3.12045	3.71621	2.65737	2.96833	2.66515	1.82826	2.02528	1.73794	2.63788	23.4148	7.31921	8.08236	8.40525	Inf	Inf	Inf	Inf	34.9196	49.4231	24.8482	36.0932	5.53873	6.77191	10.1095	1.07622	1.07293	1.37703	1.77538	2.45482	1.82011	0.869531	1.04099	1.05802	0.933041	1.17269	1.14724	1.12686	1.87166	3.74734	6.35758	1.34036	11.3024	10.7853
26	'Smoked marijuana'	3.37967	3.58245	4.19538	1.81661	2.27489	3.11523	3.73408	2.64236	2.99254	2.48134	1.82915	2.06322	1.48667	2.66095	24.1239	7.29567	8.15549	8.4742	Inf	Inf	Inf	Inf	34.5418	49.4825	19.4316	36.348	4.46053	4.50579	5.53465	1.0804	1.07071	1.35651	1.72918	2.19018	1.64956	0.868827	1.05055	1.08392	0.937401	1.19695	1.14674	1.11978	1.35054	3.75629	6.42409	1.33788	10.9503	10.8947
27	'Has driven while drinking*'	4.03979	7.49066	5.32441	2.81217	2.88172	2.90936	5.23535	2.48422	2.45506	2.38945	1.45649	1.55823	1.44439	2.2494	Inf	Inf	20.0639	7.73255	6.42409	6.35758	6.1915	6.64809	6.42536	9.50378	8.13535	5.78502	4.87645	5.90467	4.33485	1.02274	0.782845	1.15271	1.63194	2.60164	2.20055	0.908626	0.92584	0.840391	0.775515	0.955055	1.04038	1.04617	2.81966	8.53507	Inf	1.20402	5.85845	7.15233
28	'Ridden with drunk driver *'	2.81888	4.13968	3.50007	2.5302	2.5447	2.47974	3.40839	2.09725	2.27359	2.44698	1.67077	1.68205	1.62275	2.37514	6.9516	6.41865	6.26648	4.9918	3.75629	3.74734	4.15852	5.65684	5.09207	6.96454	5.02973	4.19053	3.42	3.91245	3.38808	0.958838	0.969523	1.22305	1.90085	2.26142	2.08265	0.994456	0.942451	0.959101	0.906728	1.10267	1.10371	1.11988	2.06219	Inf	8.53507	1.22431	3.63416	4.3436
29	'Does not wear seatbelt'	3.33499	4.72115	3.83256	2.35686	3.143	2.59425	3.47086	3.27754	2.4725	2.62825	1.16654	1.44775	4.58046	2.43638	0.611186	1.80957	1.88125	3.03316	1.35054	1.87166	2.04081	4.47043	2.73571	3.22913	5.42924	2.4466	5.67804	9.91111	7.32437	1.00082	1.33653	0.281653	1.9719	2.90792	3.26773	1.9812	1.81074	1.0481	1.01928	0.996539	2.27515	1.44933	Inf	2.06219	2.81966	2.42084	3.24397	2.1138
30	'Drank alcohol at school*'	5.3627	8.36005	9.58596	4.52951	5.11009	4.07441	6.15476	4.75872	3.31053	4.01563	2.2659	2.68257	2.38917	4.80293	Inf	Inf	13.7671	Inf	8.4742	8.40525	7.79026	18.3061	7.63012	12.5148	19.9951	8.59055	9.52187	16.5201	6.48509	0.766466	0.962679	1.23382	2.49843	2.67737	3.59743	0.969462	1.05269	0.884628	0.964712	0.94723	1.30239	1.16216	3.03316	4.9918	7.73255	1.33407	5.02038	5.1552
31	'Had 5+ alcoholic drinks*'	3.21452	4.29477	3.97172	2.26298	2.29024	2.94541	4.29317	2.18029	2.39789	2.44311	1.80383	1.92546	1.71693	2.48382	Inf	Inf	Inf	13.7671	8.15549	8.08236	8.88137	8.52046	9.6904	18.201	10.205	9.71945	6.18263	6.56494	5.87653	1.00174	0.884272	1.32361	2.03599	2.98501	2.65276	0.908786	0.787454	0.76162	0.751322	0.896298	0.930601	1.02553	1.88125	6.26648	20.0639	0.934445	6.85909	10.5378
32	'Drank alcohol*'	3.47914	4.74379	4.41346	2.33442	2.43168	2.90302	3.89479	2.14043	2.43475	2.28105	1.8523	2.08187	1.8435	2.43831	Inf	Inf	Inf	Inf	7.29567	7.31921	11.3152	14.0071	9.80068	23.9943	9.04479	10.8304	5.41117	5.51985	6.75863	1.01927	0.927094	1.43388	2.06237	3.0206	2.50049	0.827844	0.761676	0.756437	0.815676	0.98707	0.900786	1.04863	1.80957	6.41865	Inf	0.981375	5.4343	10.83
33	'Days had at least 1 drink of alcohol'	3.71845	4.87473	4.19189	1.79462	2.18928	3.52147	3.66273	2.59436	2.79918	2.35746	2.18362	2.48227	1.30078	2.85497	Inf	Inf	Inf	Inf	24.1239	23.4148	21.6789	22.512	29.9285	33.3277	8.60167	50.8396	4.35196	2.0105	1.98162	1.10783	0.921938	1.98832	2.0429	2.30058	1.73907	0.735531	0.856631	0.85459	0.883385	1.12079	0.885078	0.999658	0.611186	6.9516	Inf	0.936242	9.52445	21.6038
34	'Smoked cigars*'	4.65536	5.22201	5.42353	2.41072	3.2737	3.25147	4.18641	2.60936	2.56877	2.8451	1.63553	1.98236	2.41939	2.80274	13.0916	9.84428	7.56387	6.0022	6.98369	7.81474	7.76635	8.52252	6.01937	8.46179	10.6553	6.763	7.50146	9.73748	5.54998	1.02367	0.914696	0.739428	1.67643	2.67055	2.28222	1.04644	1.04357	0.884362	0.807311	0.920835	1.10282	0.982664	2.97749	4.00212	6.21626	1.25869	17.3884	16.2199
35	'Has used snuff at school*'	7.12142	8.30453	7.6346	4.25378	5.46431	3.69981	6.1103	4.17242	3.16777	4.5048	1.34632	1.95791	6.67947	3.25186	1.58045	5.39183	5.07018	7.76649	1.94787	3.47399	2.45969	8.09915	6.03518	8.03247	17.5365	6.11511	15.9923	33.0759	9.31416	0.755504	0.593717	0.34968	2.08631	4.45958	4.80944	1.69486	1.12056	0.659087	0.605343	0.586637	1.05536	0.816128	9.64844	3.00728	4.8108	0.986599	15.8334	4.08703
36	'Used snuff*'	6.28096	8.6544	7.57906	4.22048	4.28755	3.16149	6.0698	3.29022	2.79428	3.2918	1.26946	1.8171	3.0772	3.14311	4.6433	5.55299	6.40155	6.55415	2.9533	2.96079	3.10798	5.78876	5.00841	8.19933	17.8227	6.78119	13.0262	23.0938	5.74586	0.780318	0.562133	0.45322	1.6923	3.31173	3.33716	1.39888	1.12431	0.832958	0.657395	0.746297	0.984487	0.776491	5.45235	2.9653	6.23678	0.980282	11.81	6.87495
37	'Has ever smoked cigarettes daily'	3.03053	3.8247	3.70514	2.07039	2.45701	2.7159	3.01211	2.25878	2.61712	3.40218	2.3067	2.69163	3.02917	3.59768	16.565	6.9351	7.16511	4.55528	12.4398	12.4445	7.33772	6.20188	8.23692	8.17641	10.0713	10.4052	5.63855	8.96216	8.2376	1.12001	1.44993	0.698532	2.41324	3.03052	2.92802	1.30542	1.30323	0.886473	0.835313	1.00734	1.09428	1.13933	3.97342	3.3896	4.83015	1.24147	Inf	48.4075
38	'Smoked cigarettes at school*'	4.91359	6.0257	7.77871	3.36823	4.26013	4.67301	5.57875	4.08881	3.30329	3.66257	2.44306	3.12808	3.04304	4.56924	24.6733	13.334	10.2832	8.83528	18.5174	18.5831	12.0869	18.1585	8.96106	11.7812	14.3364	10.8198	7.13067	11.8903	8.23464	0.804423	1.3088	1.29721	2.47137	3.17726	3.02335	1.11677	1.33875	1.03773	0.883828	0.904251	1.20733	1.20549	3.99422	4.49992	6.09358	1.23938	Inf	Inf
39	'Has smoked*'	3.42138	3.83214	4.27017	2.16386	2.34642	3.03923	3.72413	2.41089	2.4963	2.49972	2.16423	2.37296	2.04888	3.30875	21.6038	10.83	10.5378	5.1552	10.8947	10.7853	10.1451	8.44002	10.6596	15.1318	9.77346	11.075	4.68335	5.02793	5.59393	1.10098	1.25349	1.20269	2.17587	2.71679	2.29973	1.08854	1.10002	0.886528	0.830439	1.09379	1.1146	1.15021	2.1138	4.3436	7.15233	1.17481	Inf	Inf
40	'Has ever smoked'	2.63762	2.46749	2.98316	1.90145	2.08804	2.48377	2.72355	2.28846	2.60956	3.10981	1.94196	2.02185	2.41814	2.73291	9.52445	5.4343	6.85909	5.02038	10.9503	11.3024	8.41411	8.03551	16.3796	15.4228	9.23314	13.5021	6.98481	9.48032	12.7832	1.1294	1.1932	1.04437	1.95095	3.42121	2.74478	1.11183	1.10913	1.0365	0.968686	1.25085	1.22016	1.16075	3.24397	3.63416	5.85845	1.39736	Inf	Inf
41	'Times attempted suicide *'	2.65686	3.41609	4.92647	6.45464	4.97958	2.6444	5.59668	3.03279	4.2913	5.98883	9.37649	66.9844	29.3623	Inf	2.85497	2.43831	2.48382	4.80293	2.66095	2.63788	2.85646	4.62863	5.34165	7.02489	12.5351	6.62079	5.92758	10.3182	4.10694	0.872175	1.44269	0.632157	4.81511	3.57821	5.87257	1.19322	1.19842	0.983311	0.934338	0.904479	1.12188	1.4883	2.43638	2.37514	2.2494	1.18172	2.73291	3.30875
42	'Made a plan to commit suicide ^'	1.83992	1.78564	3.08785	3.17006	3.41558	1.9319	2.80445	2.18767	2.6605	4.09603	5.9378	28.1849	Inf	29.3623	1.30078	1.8435	1.71693	2.38917	1.48667	1.73794	1.74968	2.942	2.92792	3.16719	5.05191	3.52676	4.92347	8.13456	5.08695	1.13811	1.41555	0.410709	3.66677	3.40664	4.76456	1.57865	1.1353	0.858902	0.983446	0.834416	1.17794	1.14761	4.58046	1.62275	1.44439	1.09246	2.41814	2.04888
43	'Has considered suicide ^'	1.81518	1.81416	2.99452	3.26637	3.13046	1.88969	2.76304	2.02657	2.72216	4.09134	9.39212	Inf	28.1849	66.9844	2.48227	2.08187	1.92546	2.68257	2.06322	2.02528	2.07861	2.73049	3.11394	3.62321	4.78618	3.9288	3.19386	4.37164	2.49651	1.04444	1.37326	0.73489	3.63425	2.69534	3.68782	1.25893	1.15031	0.984091	1.03418	1.00534	0.995328	1.35225	1.44775	1.68205	1.55823	0.979199	2.02185	2.37296
44	'Has felt sad/hopeless *'	1.42824	1.21943	1.88589	3.4795	2.92482	1.77725	2.59636	1.80966	2.82047	3.65124	Inf	9.39212	5.9378	9.37649	2.18362	1.8523	1.80383	2.2659	1.82915	1.82826	1.80672	2.17348	2.4858	2.47773	2.76509	3.02496	2.32111	2.60587	2.26015	1.04539	1.37076	0.926879	3.86919	2.47275	2.95959	1.05352	1.00747	0.963014	1.11002	1.021	0.984612	1.28265	1.16654	1.67077	1.45649	1.09343	1.94196	2.16423
45	'Ever had sex '	2.88251	3.8293	3.90183	2.23418	2.419	2.80083	4.49527	2.73987	5.57272	7.43216	1.80499	1.84209	1.73059	2.69354	5.40126	3.73027	4.01126	4.30649	6.75516	6.73651	5.97441	8.72151	7.09386	12.1849	26.9195	8.00959	4.60782	23.5896	9.45195	1.21661	1.13311	1.02926	1.68285	2.11297	2.05939	0.933942	1.28383	1.20577	1.02587	1.35616	1.19065	1.45785	3.05781	2.62624	5.13689	1.9999	4.91387	4.78253
46	'Forced to have sex '	2.13192	2.94494	3.91364	4.49736	4.18416	2.12329	4.11923	2.46957	6.20788	Inf	3.65124	4.09134	4.09603	5.98883	2.35746	2.28105	2.44311	4.01563	2.48134	2.66515	2.37089	3.28515	4.07909	4.89738	8.08737	4.63973	5.06001	7.42736	3.77687	0.950955	1.33855	0.571665	3.41916	2.87966	4.7293	1.20118	1.28998	0.892211	1.11065	0.94052	1.33436	1.40185	2.62825	2.44698	2.38945	1.32642	3.10981	2.49972
47	'Physically injured by boyfriend/girlfriend*'	2.67231	3.40505	3.73709	3.81288	4.1643	2.65386	4.44257	2.66754	Inf	6.20788	2.82047	2.72216	2.6605	4.2913	2.79918	2.43475	2.39789	3.31053	2.99254	2.96833	2.70835	3.83179	3.05875	4.16317	6.41087	3.77159	3.81048	5.76997	3.15127	1.00308	1.05419	0.870577	2.34592	2.30309	2.93222	1.09893	1.30297	1.14908	1.1025	1.08483	1.32195	1.28706	2.4725	2.27359	2.45506	1.50596	2.60956	2.4963
48	'Been in fight at school^'	4.02056	5.58565	5.4179	3.91091	5.21326	Inf	12.1908	Inf	2.66754	2.46957	1.80966	2.02657	2.18767	3.03279	2.59436	2.14043	2.18029	4.75872	2.64236	2.65737	2.83082	5.85424	3.32831	4.49503	6.36711	4.03001	4.46589	8.00492	3.97128	0.649812	0.724921	0.923931	1.53914	1.56402	1.82235	0.90015	1.05646	1.12735	0.949523	1.03996	1.23603	1.06109	3.27754	2.09725	2.48422	1.54992	2.28846	2.41089
49	'Injured in a fight*'	6.72677	9.17252	8.44145	8.06433	9.58031	Inf	Inf	12.1908	4.44257	4.11923	2.59636	2.76304	2.80445	5.59668	3.66273	3.89479	4.29317	6.15476	3.73408	3.71621	4.37133	6.90644	5.30264	8.43483	15.6202	7.0463	6.53892	13.4363	5.21783	0.639807	0.706223	0.806053	1.99309	2.47213	2.54491	0.902537	1.09198	0.903391	0.734858	0.77263	1.14513	1.04051	3.47086	3.40839	5.23535	1.32665	2.72355	3.72413
50	'Been in fight^'	4.58607	5.95423	4.87777	3.02415	4.55896	Inf	Inf	Inf	2.65386	2.12329	1.77725	1.88969	1.9319	2.6444	3.52147	2.90302	2.94541	4.07441	3.11523	3.12045	3.42094	6.09325	3.79241	6.00592	5.79254	4.63311	4.39153	6.21516	4.44203	0.717008	0.765988	1.0243	1.56345	1.73055	1.63273	0.822649	0.975416	1.00696	0.915435	1.01512	1.00841	0.954514	2.59425	2.47974	2.90936	1.38576	2.48377	3.03923
51	'Been threatened at school^'	4.93912	6.21021	7.26206	10.5573	Inf	4.55896	9.58031	5.21326	4.1643	4.18416	2.92482	3.13046	3.41558	4.97958	2.18928	2.43168	2.29024	5.11009	2.27489	2.35734	2.61871	5.73065	3.93917	6.31016	10.9992	4.9376	6.47375	9.99899	4.22667	0.681966	0.826207	0.682062	2.38755	2.78893	3.35838	1.06383	1.01905	0.931479	0.88139	0.842337	1.20058	0.996989	3.143	2.5447	2.88172	1.17631	2.08804	2.34642
52	'Felt unsafe at school*'	2.89859	4.37941	4.97763	Inf	10.5573	3.02415	8.06433	3.91091	3.81288	4.49736	3.4795	3.26637	3.17006	6.45464	1.79462	2.33442	2.26298	4.52951	1.81661	1.84021	2.21673	4.18598	3.20253	5.07635	9.53718	4.20465	5.48047	7.51657	3.35863	0.758363	1.08617	0.718752	2.85679	2.60733	3.49117	1.13939	1.1106	0.947905	1.02533	0.838494	1.27555	1.30321	2.35686	2.5302	2.81217	1.13943	1.90145	2.16386
53	'Carried weapon at school'	Inf	17.1982	Inf	4.97763	7.26206	4.87777	8.44145	5.4179	3.73709	3.91364	1.88589	2.99452	3.08785	4.92647	4.19189	4.41346	3.97172	9.58596	4.19538	4.33373	4.69781	11.8066	5.01894	8.6128	13.2868	6.28117	6.66376	12.6127	4.89388	0.764127	0.904065	1.07398	2.14001	2.36057	2.39996	1.17522	1.28829	1.08157	0.932993	0.953892	1.29311	1.00228	3.83256	3.50007	5.32441	1.58016	2.98316	4.27017
54	'Carried a gun*'	Inf	Inf	17.1982	4.37941	6.21021	5.95423	9.17252	5.58565	3.40505	2.94494	1.21943	1.81416	1.78564	3.41609	4.87473	4.74379	4.29477	8.36005	3.58245	3.62364	4.77363	10.9541	4.76067	8.82784	14.9386	5.50437	6.51617	12.9711	4.62343	0.768844	0.717425	0.914581	1.44654	1.84236	1.96178	1.03734	1.261	1.10459	0.758486	0.832752	1.30397	0.955766	4.72115	4.13968	7.49066	1.71109	2.46749	3.83214
55	'Carried a weapon '	Inf	Inf	Inf	2.89859	4.93912	4.58607	6.72677	4.02056	2.67231	2.13192	1.42824	1.81518	1.83992	2.65686	3.71845	3.47914	3.21452	5.3627	3.37967	3.36936	3.73275	7.50376	3.75116	6.27621	9.76305	4.8335	4.32873	8.05252	3.91811	0.840517	0.842364	1.07302	1.32353	1.63639	1.49897	0.964888	1.00724	1.09439	0.818759	0.936834	1.11382	0.883365	3.33499	2.81888	4.03979	1.46181	2.63762	3.42138
[truncated: 7 more columns]

## Sheet: 2003 Normalized OR
Question #	Questions	Carried a weapon	Carried a gun*	Carried weapon at school	Felt unsafe at school*	Been threatened at school^	Been in fight^	Injured in a fight*	Been in fight at school^	Physically injured by boyfriend/girlfriend*	Forced to have sex	Has felt sad/hopeless *	Has considered suicide ^	Made a plan to commit suicide ^	Times attempted suicide *	Days had at least 1 drink of alcohol	Drank alcohol*	Had 5+ alcoholic drinks*	Drank alcohol at school*	Smoked marijuana	Age when first tried marijuana	Used marijuana*	Used marijuana at school*	Has ever used cocaine	Has used cocaine*	Has ever used heroin	Has ever used methamphetamines	Has ever used steroids	Has ever used injected drugs	Has ever used ecstasy	Does not go to PE class+	Has not participated in sports^	Watches TV	Has fasted to lose weight *	Has taken pill to lose weight *	Has vomited to lose weight*	No fruit juice+	No fruit+	No green salad+	No potatoes+	No carrots	No vegetables+	No milk+	Does not wear seatbelt	Ridden with drunk driver *	Has driven while drinking*	Does not wear sunscreen	Has ever smoked	Has smoked*
1	'Does not wear sunscreen'	0.238138	0.465305	0.350457	-0.121306	-0.0753412	0.161062	0.0981793	0.322583	0.281074	0.097924	-0.180752	-0.33994	-0.182033	-0.0687204	-0.40466	-0.336737	-0.407432	0.106216	0.110334	0.113003	0.14708	0.233076	-0.125725	-0.00955062	-0.163949	-0.187833	-0.333679	-0.102095	-0.329747	-0.0194528	0.259829	-0.476196	-0.242169	-0.397883	-0.533382	0.357546	0.739252	0.756097	0.461105	0.726275	0.810804	0.549911	0.965894	-0.0176458	-0.0417562	0.965894	0.173095	-0.0771881
2	'No milk+'	-0.393974	-0.280327	-0.211765	0.167015	-0.219406	-0.282218	-0.157768	-0.129515	0.149029	0.272273	0.14407	0.220304	-0.0164293	0.358613	-0.21555	-0.146552	-0.178689	0.00175174	-0.0518424	-0.0427537	-0.0766496	-0.0242252	-0.0173968	0.212699	0.496168	0.00525949	-0.0720084	0.32543	-0.18396	0.281109	0.626879	-0.821507	0.511989	0.369238	0.543358	0.929719	1.13664	0.573757	0.74496	0.793598	0.983211	1.13664	0.320328	-0.051713	-0.149942	0.644469	0	-0.013156
3	'No vegetables+'	-0.13156	0.0958364	0.0837773	0.0640428	-0.0233428	-0.274987	-0.0915586	0.0186359	0.11559	0.129075	-0.309445	-0.293829	-0.0508125	-0.121153	-0.463196	-0.437818	-0.390839	0.0940925	-0.0895356	-0.0889087	0.013327	0.228779	0.00258957	0.203821	0.29508	-0.236289	0.00192156	0.386758	-0.18676	0.00739841	0.414919	-0.926807	0.0938146	-0.127633	0.107293	1.13514	1.79212	1.62987	1.48458	1.9296	1.9296	0.911194	0.898888	-0.144714	-0.22996	0.833344	0	-0.130543
4	'No carrots'	-0.0753594	-0.245265	-0.0493272	-0.235352	-0.228756	0.0404261	-0.353374	0.0753082	0.13625	-0.0696939	0.0487606	0.0264536	-0.242386	-0.126066	0.183288	0	-0.139174	-0.0594375	0.278144	0.248595	0.173592	-0.238487	-0.103645	-0.31808	-0.701687	-0.399989	-0.586048	-1.14001	-0.68004	0.37586	0.687636	0.273972	0.0238271	-0.184106	-0.358759	0.973675	1.8347	1.9653	1.50189	2.23544	2.23544	1.02743	0.013773	0.159782	-0.0475697	1.05466	0.34168	0.14811
5	'No potatoes+'	-0.188428	-0.298744	0	0.136148	-0.0820859	-0.0274092	-0.3444	0.0253364	0.240836	0.251462	0.250648	0.148555	0.07598	0.00207821	-0.0788244	-0.193871	-0.312434	0.0482323	0.00680031	7.43193e-05	-0.0802479	-0.129505	-0.0625044	-0.227555	-0.283424	-0.302737	-0.37069	-0.355802	-0.315162	0.320454	0.626605	-0.28517	0.285737	0.0648371	0.304657	0.980725	1.43253	1.19641	1.87171	1.58318	1.87171	1.06008	0.127606	-0.0411968	-0.266711	0.87078	0.0541628	-0.167992
6	'No green salad+'	0.190375	0.203763	0.17337	-0.0169397	-0.0421595	0.0702515	-0.0863315	0.233178	0.260724	-0.104298	0.00587389	0.0371097	-0.159189	0.0359663	-0.166449	-0.342462	-0.332611	-0.116612	0.176501	0.14161	0.0965479	-0.0460855	-0.215102	-0.169382	-0.299839	-0.229934	-0.489522	-0.457085	-0.541132	0.282644	0.610353	0.0140082	-0.20474	-0.596535	-0.302125	1.08948	1.90615	2.00677	1.15659	2.00677	1.97719	0.849059	0.128023	0	-0.190621	1.12596	0.111966	-0.113516
7	'No fruit+'	-0.158628	0.16553	0.196419	-0.0177014	-0.141812	-0.204951	-0.0420907	-0.0897999	0.212766	0.198311	-0.1583	0.0329853	0.0140393	0.0920889	-0.392295	-0.561791	-0.513772	-0.0949594	-0.0978996	-0.111089	-0.112215	-0.0797325	-0.137145	-0.0536247	0.248159	0.0555219	-0.0758832	0.337124	-0.234715	0.294958	0.6501	-0.886375	0.167115	0.0354189	0.143993	1.78501	1.91016	1.67686	1.16342	1.64689	1.91016	1.18266	0.687535	-0.25455	-0.280206	0.879825	-0.0196162	-0.0315158
8	'No fruit juice+'	-0.239825	-0.135368	0.0446714	0	-0.0989968	-0.46991	-0.336201	-0.340021	-0.0521596	0.0761936	-0.113048	0.143935	0.470435	0.0666043	-0.631401	-0.460827	-0.326247	-0.233002	-0.391117	-0.389949	-0.362329	-0.159766	-0.0607771	-0.0813315	0.416692	0.163866	0.371925	0.780902	0.110244	0.224353	0.564009	-1.14705	0.315076	0.494694	0.576558	1.7658	1.7658	0.84098	0.692404	0.766641	1.23396	0.956516	0.798112	-0.196279	-0.3265	0.478901	-0.0353178	-0.065864
9	'Has vomited to lose weight*'	-0.823527	-0.435331	-0.144483	0.396217	0.340272	-0.700207	-0.0598812	-0.54169	0.1445	0.834131	0.157901	0.475275	0.844847	1.1465	-0.609176	-0.0852837	0	0.439471	-0.685414	-0.543472	-0.290028	0.415589	0.369875	0.691029	1.37383	0.549489	1.18	1.844	0.833487	-1.3349	-1.36086	-2.93123	2.15048	2.114	2.15048	-0.642678	-1.09446	-1.76987	-1.2029	-1.78503	-1.01313	-0.64908	0.300792	-0.349076	-0.26963	-1.63126	0.0491957	-0.20603
10	'Has taken pill to lose weight *'	-0.668904	-0.497864	-0.140285	0.0031496	0.10029	-0.588188	-0.0736677	-0.734161	-0.17585	0.146478	-0.0733026	0.0510453	0.388928	0.459819	-0.177423	0.215413	0.198315	0.0413978	-0.248374	-0.0838009	-0.37578	-0.012834	0.41405	0.673484	1.18854	0.755128	1.03532	1.55495	0.805293	-1.3481	-1.23068	-2.2306	1.49399	2.14207	2.14207	-0.696468	-1.17496	-2.0362	-1.41465	-1.5823	-1.21998	-0.795126	0.160567	-0.202191	0	-1.46769	0.395084	0.0624803
11	'Has fasted to lose weight *'	-0.621337	-0.493122	0.071888	0.488664	0.229801	-0.380998	-0.0307254	-0.403604	0.204424	0.747912	0.926302	0.835928	0.848782	1.24184	0.00489155	0.0185773	0	0.295292	-0.235641	-0.197598	-0.233959	0.197304	0.298749	0.408329	0.743403	0.578457	0.608232	0.781554	0.310871	-1.0539	-0.852865	-1.57896	2.53224	1.84768	2.53224	-0.522394	-0.689574	-1.29071	-0.840054	-1.02068	-0.644841	-0.298684	-0.0461419	-0.0990828	-0.319143	-0.958285	-0.0615494	0.0958633
12	'Watches TV'	0.328479	0.0979866	0.329776	-0.249631	-0.325222	0.26144	-0.0842499	0.112662	0.0268488	-0.579953	0.117258	-0.217595	-1.05701	-0.434841	1.21835	0.746733	0.631283	0.529933	0.666708	0.688367	0.526557	0.491977	0.0975562	0.143876	-0.588899	-0.133655	-0.741533	-1.38488	-1.02942	-0.289166	-0.214021	1.21835	-0.326424	-0.624372	-1.29693	-0.731984	-0.490531	0.180567	-0.158428	0.482001	-0.41293	-0.379647	-1.6012	0.517293	0.431838	0.0602212	0.289441	0.493071
13	'Has not participated in sports^'	-0.396226	-0.627841	-0.294243	-0.0294909	-0.424166	-0.533348	-0.650545	-0.612847	-0.0726076	0.271925	0.306235	0.308864	0.352621	0.380019	-0.266	-0.257955	-0.326179	-0.203615	-0.0501707	-0.0471845	-0.0579728	-0.14809	0.243026	0.0590275	0.0460763	0.209036	-0.422409	-0.414703	0.0923006	1.07894	1.07894	-0.589567	0.024122	0	-0.10211	0.603526	0.670399	0.401365	0.377802	0.520119	0.553251	0.693193	0.269746	-0.193394	-0.501943	0.4207	0.10609	0.177207
14	'Does not go to PE class+'	-0.255084	-0.383669	-0.392548	-0.403471	-0.556661	-0.484371	-0.648723	-0.626338	0	-0.0769833	0.0596093	0.0583043	0.182205	-0.201742	0.143311	0.0231105	-0.00192826	-0.388138	0.107133	0.101543	-0.00681351	-0.465714	0.105961	-0.0621084	-0.52431	-0.0178247	-0.397712	-0.575908	0.0281574	1.22325	1.22325	-0.520402	-0.0326011	0.0268898	0.0681592	0.408179	0.459567	0.217966	0.21596	0.352653	0.29004	0.491734	-0.00324559	-0.0650728	0.0280139	0.285729	0.171121	0.134354
15	'Offered drugs at school ^'	-0.0295344	0.0475121	0.365344	-0.41366	0.240936	-0.059715	0.118184	-0.102398	-0.260964	-0.265903	-0.495675	-0.345504	0	-0.197324	0.0494072	0.114437	0.0812302	1.07959	0.277516	0.403279	0.492169	1.81098	0.856727	1.21255	1.12664	0.831067	0.406204	0.684826	1.05177	-1.5377	-1.58948	-1.71215	-0.481763	-0.294969	0.0106281	-1.53964	-1.62929	-1.64223	-1.62197	-1.63463	-1.46581	-1.51197	-0.135346	-0.28187	-0.132699	-1.27723	0.173469	0.0229199
16	'Has ever used ecstasy'	-0.270822	-0.0320189	0.0499968	-0.493107	-0.161459	-0.0897608	0.142469	-0.251377	-0.585048	-0.323791	-1.06456	-0.921072	0.10582	-0.202916	-1.2543	0.515749	0.313983	0.456146	0.227511	1.09666	0.674061	1.20498	2.07391	1.96752	2.98907	2.05315	1.40447	2.94908	2.98907	-2.20839	-1.99994	-3.49721	-0.904381	-0.0562672	0	-1.94248	-2.30666	-2.84236	-2.65621	-2.9398	-2.14067	-2.20989	0.631722	-0.480515	-0.124998	-2.26111	1.4352	0.24288
17	'Has ever used injected drugs'	0.0993675	0.787155	0.746728	0	0.411709	-0.274283	0.837989	0.0908141	-0.381509	-0.0172233	-1.52831	-0.7819	0.113991	0.457045	-1.90252	-0.445444	-0.195291	1.13608	-0.738293	-0.15051	-0.205379	1.22799	2.00113	1.8979	4.23114	1.89492	3.5798	4.23114	2.27998	-3.48155	-3.17603	-4.52175	-1.10279	0.0242936	0.341421	-1.94091	-2.40391	-3.4274	-3.36594	-4.06886	-2.23624	-2.36959	0.398973	-0.942001	-0.348217	-2.70256	0.334863	-0.580108
18	'Has ever used steroids'	-0.225195	0.364884	0.397197	0.115161	0.355461	-0.204416	0.369913	-0.180193	-0.409167	0	-1.12433	-0.66384	-0.0394653	0.228304	-0.217474	0.0968	0.28908	0.912105	-0.181926	0.130415	-0.00231594	0.867421	1.15388	1.46047	2.64188	1.31693	4.15074	4.15074	1.30632	-2.73242	-2.61281	-3.30748	-0.70518	0.0756023	0.248355	-1.77896	-2.24598	-2.88891	-2.80989	-2.94396	-2.05015	-2.19609	0.166254	-0.565143	-0.0533093	-2.36321	0.465081	-0.1116
19	'Has ever used methamphetamines'	-0.18751	0	0.190455	-0.388594	-0.156768	-0.248599	0.356287	-0.449797	-0.545406	-0.246539	-0.863663	-0.48649	-0.642235	0.266424	3.2073	0.97644	0.820296	0.642172	2.72322	2.71308	1.1035	1.20231	3.22699	2.65212	3.72582	3.72582	1.19549	2.34441	1.83356	-2.47397	-2.1028	-2.82104	-0.856392	-0.32603	-0.503595	-2.10845	-2.23602	-2.75076	-2.86338	-2.87934	-2.40979	-2.24026	-1.1698	-0.393445	0.0717445	-2.3388	1.29453	1.00866
20	'Has ever used heroin'	0.0805099	0.694155	0.525099	0.0467413	0.252504	-0.672626	0.758517	-0.536183	-0.526302	-0.191152	-1.73949	-0.947947	-0.869993	0.44108	-0.102206	-0.0297343	0.144386	1.11475	1.07351	1.42824	0.627115	1.29107	3.51099	2.62539	3.93439	2.97958	1.7742	3.93439	2.02323	-3.7267	-3.012	-4.02252	-1.43769	-0.638864	-0.425498	-2.60187	-2.78962	-3.56691	-3.59031	-3.92728	-2.62467	-2.4956	-0.766073	-0.87634	-0.182618	-3.06116	0	0.0820469
21	'Has used cocaine*'	-0.162581	0.329585	0.294007	-0.468684	-0.154798	-0.226091	0.263884	-0.644144	-0.754792	-0.520464	-1.50346	-0.955208	-1.14927	0	2.24618	1.77215	1.37347	0.83309	2.81637	2.81464	1.89005	1.43682	3.01973	3.01973	3.01973	2.30022	0.987135	1.9955	1.39602	-2.87015	-2.60471	-2.8954	-1.37842	-0.75957	-0.713951	-2.70555	-2.69706	-3.0421	-3.14009	-3.14933	-2.32158	-2.38472	-1.12133	-0.0124476	0.436027	-2.51241	1.13452	1.10704
22	'Has ever used cocaine '	-0.420046	-0.0762189	0	-0.648172	-0.349494	-0.40427	0.0793275	-0.592595	-0.714444	-0.299136	-1.01367	-0.688643	-0.777509	0.0899021	2.57606	0.965498	0.949172	0.604321	2.78289	2.79858	1.16114	1.2326	4.39043	4.39043	4.39043	3.36019	1.16564	2.58382	1.9875	-2.21699	-1.93562	-2.45663	-1.00291	-0.533913	-0.550014	-2.1999	-2.29549	-2.60273	-2.48995	-2.4498	-2.03772	-2.12972	-0.87547	0.0208695	0.356394	-2.1435	1.70644	1.08669
23	'Used marijuana at school*'	0.274907	0.820686	0.92881	-0.567141	-0.114007	-0.0254932	0.155235	-0.0832239	-0.694688	-0.916748	-1.5127	-1.18355	-1.07591	-0.42212	1.85991	1.17538	0.458224	1.56155	1.86518	1.86518	1.86518	1.86518	0.927282	1.61658	1.86518	1.03018	0.573855	1.50536	0.813256	-3.09399	-2.63206	-2.36753	-1.40967	-1.26612	-0.809623	-2.60421	-2.5434	-2.73904	-2.86227	-2.88997	-2.11685	-2.44188	-0.472293	-0.13271	0.100233	-2.09002	0.373684	0.44454
24	'Used marijuana*'	0	0.354849	0.331751	-0.751807	-0.511378	-0.125844	0.227835	-0.399015	-0.462821	-0.65481	-1.04686	-0.844621	-1.09315	-0.38601	2.53798	1.59996	1.25054	1.06143	2.80229	2.80229	2.80229	2.80229	1.58828	2.80229	1.9337	1.66384	0.436587	0.804457	1.0148	-1.90262	-1.80947	-1.60048	-1.10847	-0.896596	-0.782771	-2.07431	-1.84341	-1.86394	-2.08055	-1.74542	-1.59984	-1.76183	-0.871092	0.155834	0.730051	-1.44354	1.17257	1.44248
25	'Age when first tried marijuana'	-0.0441188	0.0608438	0.319013	-0.916724	-0.559437	-0.154841	0.0972365	-0.386595	-0.226944	-0.382379	-0.926122	-0.778473	-0.999219	-0.397215	2.75275	1.07509	1.21818	1.2747	3.83052	3.83052	3.83052	3.83052	3.32937	3.83052	2.83847	3.37706	0.672959	0.962968	1.54104	-1.69062	-1.69504	-1.33503	-0.968465	-0.500975	-0.932573	-1.99829	-1.73864	-1.71523	-1.89658	-1.56678	-1.59843	-1.62429	-0.892275	0.10927	0.871883	-1.37398	1.70197	1.6344
26	'Smoked marijuana'	0	0.0840669	0.311921	-0.895631	-0.571084	-0.117543	0.14387	-0.355055	-0.175512	-0.445759	-0.885707	-0.711984	-1.18479	-0.344941	2.83551	1.11016	1.27089	1.3262	3.87196	3.87196	3.87196	3.87196	3.35339	3.87196	2.52345	3.42692	0.400333	0.4149	0.711612	-1.64532	-1.65831	-1.31698	-0.966792	-0.625834	-1.0348	-1.95974	-1.68574	-1.64063	-1.85014	-1.49751	-1.55934	-1.59367	-1.32335	0.152427	0.926611	-1.33693	1.69602	1.68867
27	'Has driven while drinking*'	-0.101703	0.78911	0.296639	-0.6243	-0.589052	-0.575283	0.272303	-0.803188	-0.820227	-0.859306	-1.57349	-1.47608	-1.58552	-0.946443	2.21054	2.21054	2.21054	0.834961	0.567509	0.552495	0.514305	0.616957	0.567795	1.13252	0.908221	0.41634	0.169848	0.445874	0	-2.08354	-2.46918	-1.91095	-1.4094	-0.736562	-0.978119	-2.25422	-2.22715	-2.36685	-2.48276	-2.18233	-2.05887	-2.05087	-0.620459	0.97742	2.21054	-1.84813	0.434536	0.722429
28	'Ridden with drunk driver *'	0	0.554398	0.312264	-0.155872	-0.147627	-0.184934	0.273971	-0.426619	-0.31015	-0.204118	-0.754607	-0.744899	-0.796683	-0.247108	1.30222	1.18715	1.15253	0.82444	0.414187	0.410745	0.560951	1.00488	0.853133	1.30491	0.835361	0.572012	0.278876	0.472952	0.265346	-1.55576	-1.53977	-1.20463	-0.568475	-0.317891	-0.436702	-1.50314	-1.58063	-1.55537	-1.63638	-1.35411	-1.35276	-1.33178	-0.450942	1.59828	1.59828	-1.20315	0.366501	0.623771
29	'Does not wear seatbelt'	0.362368	0.863822	0.562993	-0.138448	0.276828	0	0.419977	0.337296	-0.0693443	0.0187852	-1.15308	-0.841504	0.820175	-0.0905752	-2.08563	-0.51967	-0.463624	0.225507	-0.941781	-0.470996	-0.34617	0.785097	0.0765981	0.315829	1.06543	-0.0845357	1.13008	1.93373	1.49739	-1.37413	-0.956828	-3.20332	-0.395729	0.164672	0.332971	-0.388945	-0.51874	-1.30754	-1.34777	-1.38032	-0.189354	-0.839932	1.93373	-0.331137	0.120208	-0.0998086	0.322443	-0.295476
30	'Drank alcohol at school*'	0.095163	0.735715	0.933126	-0.148443	0.0255505	-0.301208	0.293906	-0.0772247	-0.600737	-0.322172	-1.14772	-0.904179	-1.07129	-0.0638824	1.99377	1.99377	1.45536	1.99377	0.75528	0.743494	0.633874	1.86646	0.603908	1.31777	1.99377	0.774953	0.923448	1.71835	0.36933	-2.7115	-2.38267	-2.02467	-1.00678	-0.906979	-0.480831	-2.37254	-2.25372	-2.50465	-2.37963	-2.40601	-1.94663	-2.11099	-0.726975	-0.00823611	0.623146	-1.91197	0	0.03823
31	'Had 5+ alcoholic drinks*'	-0.305159	0.112819	0	-0.81154	-0.794264	-0.431293	0.112281	-0.865243	-0.727995	-0.701042	-1.1387	-1.04456	-1.20993	-0.6772	2.33677	2.33677	2.33677	1.79339	1.03801	1.02501	1.16102	1.10117	1.28679	2.19619	1.36145	1.29111	0.638457	0.72502	0.565202	-1.98726	-2.1672	-1.58528	-0.964034	-0.412027	-0.582268	-2.12775	-2.33449	-2.38262	-2.40226	-2.14771	-2.09353	-1.9534	-1.07807	0.657892	2.33677	-2.08758	0.788255	1.40774
32	'Drank alcohol*'	-0.100547	0.346759	0.242632	-0.676214	-0.617326	-0.361727	0.0622664	-0.801378	-0.615506	-0.709579	-1.00996	-0.841401	-1.01683	-0.6134	2.68534	2.68534	2.68534	2.68534	0.96776	0.972407	1.60091	1.90881	1.3936	2.68534	1.27781	1.53774	0.53666	0.56535	0.857451	-1.87174	-2.00849	-1.37935	-0.854974	-0.304446	-0.577069	-2.17185	-2.29203	-2.30199	-2.19321	-1.91806	-2.05002	-1.83078	-1.04363	0.78299	2.68534	-1.9264	0.542815	1.53768
33	'Days had at least 1 drink of alcohol'	0.359952	0.750573	0.53285	-0.691068	-0.404295	0.28143	0.33817	-0.159369	-0.0497472	-0.297518	-0.408029	-0.223092	-1.15537	-0.0212759	4.13313	4.13313	4.13313	4.13313	3.05764	3.0146	2.90347	2.95787	3.3687	3.5239	1.56987	4.13313	0.586916	-0.527194	-0.548069	-1.38701	-1.65201	-0.5432	-0.50413	-0.332753	-0.736432	-1.97789	-1.758	-1.76144	-1.71364	-1.37024	-1.71087	-1.53524	-2.24507	1.26259	4.13313	-1.6298	1.71689	2.89846
34	'Smoked cigars*'	0.189475	0.355187	0.409815	-0.759953	-0.318495	-0.328325	0.0362943	-0.645721	-0.668341	-0.520938	-1.31966	-1.0422	-0.754777	-0.542578	1.68115	1.26987	0.889707	0.556073	0.77457	0.93678	0.927818	1.06186	0.560194	1.05154	1.38407	0.728246	0.877753	1.25413	0.443064	-1.99567	-2.15805	-2.46494	-1.28402	-0.612279	-0.838981	-1.96393	-1.96789	-2.20671	-2.33822	-2.1484	-1.88822	-2.05465	-0.455319	-0.0286552	0.606628	-1.6975	2.09063	1.99028
35	'Has used snuff at school*'	0.675255	0.896989	0.775644	-0.0681641	0.293129	-0.269459	0.454334	-0.0960263	-0.493442	0.0145531	-1.72789	-1.1876	0.582825	-0.455645	-1.49658	0.273866	0.185128	0.800353	-1.19501	-0.360314	-0.858433	0.860861	0.436487	0.848934	1.97538	0.455468	1.8424	2.8908	1.06252	-2.5614	-2.90906	-3.6728	-1.09596	0	0.10896	-1.39574	-1.99269	-2.75837	-2.88108	-2.92637	-2.07918	-2.45004	1.11339	-0.568451	0.109369	-2.17637	1.82799	-0.125856
36	'Used snuff*'	0.912367	1.37481	1.1834	0.338787	0.361535	-0.0780145	0.86303	-0.0204349	-0.256141	-0.0197438	-1.3944	-0.876984	-0.116999	-0.0864268	0.47653	0.734645	0.939801	0.973789	-0.176293	-0.172636	-0.10264	0.794635	0.585733	1.29689	2.41702	1.02292	1.96472	2.79082	0.783904	-2.09649	-2.56964	-2.88034	-0.979637	-0.0110331	0	-1.25435	-1.56958	-2.0023	-2.34379	-2.1608	-1.76117	-2.10358	0.708258	-0.17044	0.902183	-1.76735	1.82332	1.04273
37	'Has ever smoked cigarettes daily'	-0.247499	0.0882771	0.0424579	-0.797169	-0.550167	-0.405638	-0.256292	-0.671522	-0.459086	-0.0806074	-0.64124	-0.418589	-0.248145	0	2.20299	0.946848	0.99392	0.340472	1.78982	1.79037	1.02826	0.785638	1.19504	1.1844	1.48511	1.53216	0.648255	1.31678	1.19516	-1.68356	-1.31108	-2.36467	-0.576099	-0.247503	-0.297141	-1.46255	-1.46498	-2.02092	-2.10668	-1.83651	-1.71709	-1.65889	0.143314	-0.0859544	0.425	-1.53502	3.75009	3.75009
38	'Smoked cigarettes at school*'	-0.0923904	0.201962	0.570363	-0.637179	-0.298272	-0.164816	0.0907726	-0.357487	-0.665264	-0.51631	-1.10048	-0.743891	-0.783655	-0.197214	2.23571	1.34787	0.973051	0.754108	1.82164	1.82675	1.20621	1.79341	0.774501	1.16924	1.45244	1.04643	0.444869	1.18254	0.652538	-2.70314	-2.00093	-2.01376	-1.08385	-0.721385	-0.793019	-2.22983	-1.96828	-2.33573	-2.56733	-2.53437	-2.11735	-2.11955	-0.391253	-0.219269	0.218123	-2.07955	2.77846	2.77846
39	'Has smoked*'	-0.122323	0.0412468	0.197389	-0.783299	-0.666443	-0.293196	0	-0.627336	-0.577113	-0.575135	-0.783049	-0.650216	-0.86207	-0.170619	2.53631	1.54005	1.5006	0.469124	1.54865	1.53409	1.44581	1.18034	1.51717	2.02261	1.39197	1.57234	0.330636	0.433062	0.586958	-1.75812	-1.57095	-1.63064	-0.775311	-0.455002	-0.695439	-1.77451	-1.75938	-2.07067	-2.16496	-1.76757	-1.74037	-1.695	-0.817064	0.221988	0.941509	-1.66448	3.70026	3.70026
40	'Has ever smoked'	-0.259575	-0.355766	-0.0819696	-0.731711	-0.596664	-0.346281	-0.213324	-0.464433	-0.275007	-0.0219852	-0.7013	-0.643134	-0.384914	-0.208371	1.59282	0.783283	1.11921	0.668986	1.79409	1.83975	1.414	1.34758	2.37501	2.28818	1.54801	2.0963	1.14541	1.58612	2.01737	-1.48326	-1.40398	-1.59617	-0.694632	0.115693	-0.202122	-1.50587	-1.50939	-1.60709	-1.70471	-1.33591	-1.37174	-1.44376	0.0389467	0.20281	0.891707	-1.1761	2.46124	2.46124
41	'Times attempted suicide *'	-0.242471	0.120153	0.648363	1.03814	0.663831	-0.24925	0.832379	-0.0515471	0.449224	0.930082	1.57685	4.41356	3.2237	4.41356	-0.138718	-0.366312	-0.33963	0.611723	-0.240253	-0.252812	-0.137965	0.558394	0.765094	1.16028	1.99571	1.07481	0.915252	1.71493	0.385873	-1.8495	-1.12343	-2.31384	0.615375	0.187047	0.9018	-1.39733	-1.39106	-1.67647	-1.75018	-1.79703	-1.48627	-1.07852	-0.367452	-0.404179	-0.482653	-1.4113	-0.201752	0.0740918
42	'Made a plan to commit suicide ^'	-0.394995	-0.4382	0.351964	0.389869	0.497489	-0.324621	0.213079	-0.145247	0.137054	0.759587	1.29529	3.54221	3.60125	3.60125	-0.895264	-0.392195	-0.494811	-0.0181336	-0.702551	-0.477264	-0.467549	0.282156	0.275234	0.388561	1.06219	0.543702	1.02503	1.74942	1.07216	-1.088	-0.773278	-2.55845	0.59987	0.493708	0.977701	-0.615947	-1.09156	-1.49408	-1.29872	-1.5358	-1.03838	-1.07601	0.92085	-0.576203	-0.744176	-1.14706	-0.00074237	-0.239807
43	'Has considered suicide ^'	-0.197767	-0.198579	0.524445	0.64981	0.588497	-0.13973	0.408376	-0.0388359	0.386872	0.974693	2.17357	5.00787	3.75897	5.00787	0.253779	0	-0.112676	0.365739	-0.0129824	-0.0397567	-0.00226323	0.39128	0.580861	0.799388	1.201	0.916209	0.617421	1.07029	0.262031	-0.995143	-0.600273	-1.50228	0.803777	0.372587	0.82489	-0.725685	-0.855854	-1.08102	-1.00939	-1.0502	-1.06464	-0.622519	-0.524068	-0.307657	-0.417974	-1.08821	-0.0422018	0.188809
44	'Has felt sad/hopeless *'	-0.401007	-0.629037	0	0.883631	0.6331	-0.0856054	0.461242	-0.05953	0.580688	0.953139	2.3162	2.3162	1.65468	2.3138	0.211472	-0.0259277	-0.0641874	0.264832	-0.0440751	-0.0447751	-0.0618744	0.204755	0.398463	0.393771	0.552079	0.681666	0.299566	0.466518	0.261171	-0.851208	-0.460272	-1.0248	1.03678	0.390869	0.650147	-0.840038	-0.904509	-0.969621	-0.764662	-0.885264	-0.937621	-0.556123	-0.693011	-0.174735	-0.372756	-0.786388	0.0422626	0.198605
45	'Ever had sex '	-0.0851765	0.32458	0.351652	-0.452754	-0.33809	-0.126644	0.555906	-0.158393	0.865882	1.28128	-0.760513	-0.731158	-0.821235	-0.182994	0.820795	0.28678	0.391556	0.494013	1.14349	1.1395	0.966296	1.51208	1.21407	1.99452	3.13808	1.38923	0.591585	2.94758	1.62811	-1.32964	-1.43221	-1.5709	-0.861596	-0.533229	-0.57028	-1.7111	-1.25204	-1.34254	-1.57565	-1.17297	-1.36076	-1.06866	0	-0.2195	0.748394	-0.612574	0.68436	0.645273
46	'Forced to have sex '	-0.466083	0	0.410272	0.61084	0.5067	-0.471937	0.484136	-0.253977	1.07586	1.45743	0.310149	0.474333	0.475989	1.02404	-0.321007	-0.368538	-0.269518	0.447387	-0.247117	-0.144022	-0.312811	0.157719	0.470009	0.733772	1.45743	0.655801	0.780901	1.33461	0.358951	-1.63079	-1.13757	-2.365	0.215402	-0.0323397	0.683387	-1.29379	-1.19089	-1.72278	-1.40684	-1.64671	-1.14209	-1.07091	-0.164138	-0.267236	-0.301562	-1.1507	0.0785878	-0.236471
47	'Physically injured by boyfriend/girlfriend*'	-0.0193269	0.330259	0.464499	0.493465	0.620657	-0.029326	0.713979	-0.0219078	1.2431	1.19668	0.0585205	0.00733493	-0.0257216	0.664	0.0475865	-0.153643	-0.175649	0.289644	0.143953	0.132235	0	0.500602	0.175524	0.620267	1.2431	0.477756	0.492557	1.09115	0.218517	-1.43298	-1.36128	-1.63737	-0.207263	-0.233845	0.114578	-1.30132	-1.05561	-1.23694	-1.29664	-1.31994	-1.03475	-1.07333	-0.131445	-0.252445	-0.14166	-0.846729	-0.0536112	-0.117626
48	'Been in fight at school^'	0.623699	1.09803	1.05404	0.583808	0.998489	2.22402	2.22402	2.22402	0.0318114	-0.0794359	-0.527978	-0.364654	-0.254304	0.216948	-0.0083164	-0.285795	-0.259178	0.866875	0.0181284	0.0263032	0.117525	1.16579	0.351092	0.784634	1.28694	0.627085	0.77525	1.61719	0.605907	-2.0056	-1.8478	-1.49784	-0.761572	-0.738438	-0.517893	-1.53546	-1.30446	-1.21077	-1.45842	-1.32716	-1.07799	-1.29816	0.328915	-0.315195	-0.0709024	-0.751501	-0.189318	-0.11413
49	'Injured in a fight*'	0.707539	1.15494	1.03512	0.969181	1.2177	1.92296	1.92296	1.56534	0.10902	0	-0.665884	-0.576119	-0.554655	0.442196	-0.169455	-0.0808285	0.059669	0.579328	-0.141624	-0.148543	0.0856979	0.745567	0.364336	1.03398	1.92296	0.774491	0.666678	1.70569	0.341075	-2.68667	-2.54418	-2.35343	-1.04737	-0.736622	-0.694762	-2.19032	-1.91543	-2.18895	-2.48684	-2.41452	-1.84686	-1.98509	-0.247082	-0.273283	0.345911	-1.63458	-0.596887	-0.145472
50	'Been in fight^'	0.656559	1.03321	0.745523	0.0558315	0.648005	1.09509	1.09509	1.09509	-0.13261	-0.454398	-0.711057	-0.622551	-0.59068	-0.137758	0.27548	-0.0031467	0.0177699	0.48589	0.098638	0.101054	0.233694	1.06651	0.382414	1.04568	0.993496	0.67128	0.594024	1.09509	0.610521	-2.02064	-1.92531	-1.50606	-0.895969	-0.749467	-0.833412	-1.82235	-1.57661	-1.53069	-1.66817	-1.51905	-1.52861	-1.60786	-0.165384	-0.230513	0	-1.07003	-0.228169	0.0630072
51	'Been threatened at school^'	0.652112	0.982499	1.20824	1.74802	1.80718	0.536561	1.60793	0.730042	0.40593	0.412795	-0.103794	-0.00576761	0.119986	0.663879	-0.521688	-0.37019	-0.456645	0.701204	-0.466347	-0.414985	-0.263285	0.866556	0.325747	1.00553	1.80718	0.651666	1.04246	1.66964	0.427379	-2.20437	-1.92757	-2.20417	-0.396614	-0.172433	0.0956232	-1.56288	-1.62492	-1.75455	-1.83429	-1.89967	-1.38841	-1.65649	0	-0.30465	-0.125212	-1.41787	-0.589995	-0.421683
52	'Felt unsafe at school*'	0.0209588	0.616343	0.801066	1.88577	1.88577	0.0821388	1.49716	0.453113	0.416489	0.654686	0.284487	0.193297	0.150117	1.17594	-0.670711	-0.291327	-0.33617	0.664962	-0.653144	-0.634521	-0.365962	0.551173	0.164819	0.829398	1.73917	0.557592	0.939908	1.39568	0.233482	-1.91343	-1.39514	-1.99083	0	-0.131822	0.289319	-1.32613	-1.36305	-1.59158	-1.47831	-1.76852	-1.16328	-1.13232	-0.277525	-0.175143	-0.0227093	-1.32609	-0.587292	-0.400788
53	'Carried weapon at school'	2.03539	2.03539	2.03539	0.246656	0.791577	0.217421	1.00869	0.368932	-0.166886	-0.100291	-1.15355	-0.486478	-0.442197	0.231754	-0.0012018	0.0731097	-0.0790395	1.19212	0	0.0468066	0.163186	1.49271	0.258582	1.03768	1.66312	0.582231	0.667535	1.588	0.222176	-2.45692	-2.2143	-1.96583	-0.971185	-0.829666	-0.80579	-1.83587	-1.70334	-1.95568	-2.16886	-2.1369	-1.69795	-2.06551	-0.130493	-0.261417	0.34382	-1.40873	-0.49196	0.0254902
54	'Carried a gun*'	2.05467	2.05467	2.05467	0.0812168	0.585123	0.524395	1.1478	0.432207	-0.281844	-0.49128	-1.76331	-1.19022	-1.21308	-0.277174	0.235804	0.19652	0.0530626	1.01399	-0.208572	-0.19208	0.205567	1.40387	0.201646	1.09254	1.85146	0.411059	0.654505	1.64771	0.159443	-2.42876	-2.52862	-2.17834	-1.51691	-1.16796	-1.07736	-1.99663	-1.71495	-1.906	-2.44833	-2.31356	-1.66661	-2.11479	0.189619	0	0.855574	-1.2746	-0.746473	-0.111369
55	'Carried a weapon '	1.54965	1.54965	1.54965	-0.202332	0.566572	0.459576	1.01223	0.269712	-0.319594	-0.645528	-1.22344	-0.877572	-0.858038	-0.327963	0.157019	0.0610489	-0.0530806	0.685277	0.0191969	0.0147929	0.162554	1.16993	0.169655	0.91221	1.54965	0.535385	0.376262	1.27176	0.232475	-1.98834	-1.98517	-1.63601	-1.33329	-1.02717	-1.15372	-1.78925	-1.72727	-1.60755	-2.02617	-1.83182	-1.58217	-1.9166	0	-0.242563	0.276596	-1.18993	-0.338447	0.0368964
[truncated: 7 more columns]

[truncated: 2 more sheets: 2001 Raw OR, 2001 Normalized OR]
