# Supplementary material for: Gun Possession among American Youth: A Discovery-Based Approach to Understand Gun Violence
Source: PLoS One. 2014 Nov 5;9(11):e111893. doi: 10.1371/journal.pone.0111893 (PMC4221159; doi:10.1371/journal.pone.0111893)
Supplement: Table S4 — YRBSS Odds Ratio Matrices assessing associations with reported gun carrying between 2001–2011. Normalized and raw odds ratio matrices for all pairwise variable comparisons between “Carried a gun” and each of the 55 other survey questions. (XLSX) [file pone.0111893.s012.xlsx]

## Sheet: Table S4A
"Carried a gun" Raw Odds Ratio Matrix
	2001	2003	2005	2007	2009	2011
'Carried a weapon '	Inf	Inf	Inf	Inf	Inf	Inf
'Carried a gun*'	Inf	Inf	Inf	Inf	Inf	Inf
'Carried weapon at school'	15.0453	17.1982	13.9232	15.6703	17.988	18.1736
'Has ever used heroin'	12.6986	14.9386	11.1047	12.8779	15.2351	17.6613
'Has ever used injected drugs'	13.9034	12.9711	10.4255	11.0714	17.8776	17.6506
'Has used cocaine*'	7.8559	8.82784	7.74004	8.70841	13.427	15.3333
'Has ever used methamphetamines'	4.72027	5.50437	5.04351	6.07086	9.36421	12.4583
'Has ever used steroids'	7.21446	6.51617	6.49128	7.89916	11.3093	10.9087
'Smoked cigars*'	8.4516	8.30453	7.33757	10.0468	10.2729	10.4171
'Has ever smoked cigarettes daily'	4.58414	6.0257	5.15483	5.94208	7.37194	9.53255
'Injured in a fight*'	8.1719	9.17252	7.26916	7.79306	9.55643	8.87725
'Used marijuana at school*'	8.67571	10.9541	7.50515	8.02237	9.77104	8.79913
'Does not wear seatbelt'	6.00397	4.72115	5.46945	6.27457	8.20018	8.47589
'Has used snuff at school*'	7.15341	8.6544	6.1608	7.37817	7.90676	8.28111
'Drank alcohol at school*'	7.75585	8.36005	6.61244	6.43641	8.41185	8.19232
'Been threatened at school^'	5.74855	6.21021	5.31502	6.22129	7.53027	7.84922
'Has ever used cocaine '	4.79199	4.76067	4.49421	5.05775	6.1743	7.68773
'Has driven while drinking*'	5.80309	7.49066	5.94254	6.18666	7.35268	7.54751
'Been in fight^'	5.22574	5.95423	5.64767	6.75236	7.04045	7.12117
'Has ever used ecstasy'	4.76464	4.62343	6.11692	7.76623	7.07159	7.08451
'Offered drugs at school ^'	5.49911	5.22201	5.45546	5.56311	5.81678	6.08283
'Been in fight at school^'	5.18502	5.58565	4.98439	5.12228	6.03175	5.82431
'Smoked cigarettes at school*'	2.9323	4.01127	3.61065	3.7631	4.02355	5.1152
'Has smoked*'	2.88757	3.83214	3.61042	3.75388	3.89709	4.77118
'Drank alcohol*'	4.12624	4.74379	3.61366	3.4257	4.16106	4.74116
'Felt unsafe at school*'	2.80785	4.37941	2.77323	3.67693	4.535	4.68417
'Used snuff*'	2.72822	3.8247	3.27342	3.72	4.21539	4.48304
'Days had at least 1 drink of alcohol'	4.24235	4.87473	3.04024	3.60745	4.20115	4.39654
'Had 5+ alcoholic drinks*'	4.19081	4.29477	3.84599	3.26783	4.05476	4.38147
'Used marijuana*'	3.96875	4.77363	3.69038	4.0514	4.29385	4.11125
'Ridden with drunk driver *'	3.5731	4.13968	3.14811	3.58475	3.6238	3.90023
'Physically injured by boyfriend/girlfriend*'	3.52032	3.40505	3.02406	3.37574	3.56049	3.73528
'Injured from attempted suicide'	3.33179	3.32707	2.16328	2.81825	3.93017	3.63772
'Times attempted suicide *'	3.31508	3.41609	2.18568	2.87744	3.90091	3.50723
'Age when first tried marijuana'	3.14976	3.62364	2.94415	3.32842	3.3526	3.46604
'Smoked marijuana'	3.11599	3.58245	2.87619	3.3421	3.33529	3.42158
'Has ever smoked'	2.50469	2.46749	2.48416	3.06866	3.43606	3.27856
'Ever had sex '	3.00896	2.89358	2.73636	2.84548	3.07876	3.22055
'Forced to have sex '	3.28818	2.94494	2.57815	3.27022	3.66898	3.06252
'Has taken pill to lose weight *'	2.00173	1.84236	2.36382	2.34534	2.84887	2.9683
'Has vomited to lose weight*'	2.37336	1.96178	2.30345	2.4604	3.47837	2.93368
'Made a plan to commit suicide ^'	2.38317	1.78564	1.64835	2.16096	2.3492	2.4175
'Has considered suicide ^'	1.73149	1.81416	1.54166	1.70175	1.99502	1.98174
'Has fasted to lose weight *'	1.3862	1.44654	1.61998	1.53326	1.72217	1.71165
'Does not wear sunscreen'	1.54932	1.71109	1.59379	1.8161	1.61023	1.55962
'Has felt sad/hopeless *'	1.44796	1.21943	1.2007	1.22866	1.44341	1.45323
'No vegetables+'	1.0494	1.30397	1.20454	1.35886	1.47329	1.31228
'Watches TV'	1.10777	0.914581	1.1934	0.821566	0.996329	1.21887
'No fruit+'	1.07616	1.261	0.893742	1.30764	1.48451	1.1393
'No green salad+'	1.09972	1.10459	1.07181	1.19535	0.982819	0.901249
'No fruit juice+'	1.01916	1.03734	0.954894	0.97387	0.939655	0.892632
'No milk+'	0.827552	0.955766	0.865864	1.13615	1.09382	0.819896
'Does not go to PE class+'	0.766496	0.768844	0.676756	0.857453	0.857964	0.749926
'Has not participated in sports^'	0.705077	0.717425	0.676907	0.796834	0.708548	0.72707
'No carrots'	0.827725	0.832752	0.797294	0.903595	0.871034	0.713837
'No potatoes+'	0.748183	0.758486	0.733877	0.767286	0.798452	0.603067
	3.32344	3.9217	3.09417	3.50522	3.97686	4.24636

## Sheet: Table S4B
"Carried a gun" Normalized Odds Ratio Matrix
	2001	2003	2005	2007	2009	2011
'Carried a weapon '	2.1347	2.07722	2.11651	2.12353	2.15491	2.04988
'Carried a gun*'	2.1347	2.07722	2.11651	2.12353	2.15491	2.04988
'Carried weapon at school'	2.1347	2.07722	2.11651	2.12353	2.15491	2.04988
'Has ever used heroin'	1.89004	1.87401	1.79018	1.84039	1.91527	2.00862
'Has ever used injected drugs'	2.02081	1.67026	1.69913	1.62234	2.14603	2.00775
'Has used cocaine*'	1.19723	1.11509	1.26942	1.27598	1.73301	1.8047
'Has ever used methamphetamines'	0.462321	0.43361	0.651511	0.755468	1.2131	1.50514
'Has ever used steroids'	1.07434	0.677056	1.01559	1.13527	1.48538	1.31351
'Smoked cigars*'	1.30268	1.02693	1.19238	1.48223	1.34672	1.24699
'Has ever smoked cigarettes daily'	0.420104	0.564162	0.683008	0.724535	0.867991	1.11897
'Injured in a fight*'	1.25412	1.17035	1.17887	1.11576	1.24242	1.01622
'Used marijuana at school*'	1.34043	1.42642	1.22496	1.1576	1.27446	1.00347
'Does not wear seatbelt'	0.809369	0.21217	0.768477	0.803085	1.0216	0.94947
'Has used snuff at school*'	1.06208	1.08647	0.940201	1.03683	0.969033	0.91593
'Drank alcohol at school*'	1.17874	1.03654	1.04227	0.839823	1.05837	0.900377
'Been threatened at school^'	0.746649	0.607674	0.727156	0.790781	0.898648	0.838654
'Has ever used cocaine '	0.484076	0.224197	0.485151	0.492063	0.612223	0.808662
'Has driven while drinking*'	0.760272	0.878126	0.888163	0.782729	0.864217	0.782107
'Been in fight^'	0.609087	0.546946	0.814738	0.90896	0.801614	0.698219
'Has ever used ecstasy'	0.475821	0.181995	0.929887	1.11078	0.807981	0.690774
'Offered drugs at school ^'	0.682649	0.357637	0.764783	0.629459	0.526167	0.470849
'Been in fight at school^'	0.597802	0.454758	0.634498	0.510354	0.578522	0.408193
'Smoked cigarettes at school*'	-0.224516	-0.0229093	0.16934	0.0654891	-0.00558502	0.220896
'Has smoked*'	-0.24669	-0.0888178	0.169247	0.0619514	-0.0516571	0.120451
'Drank alcohol*'	0.268279	0.219071	0.170544	-0.0700337	0.0428988	0.111346
'Felt unsafe at school*'	-0.287084	0.103768	-0.211349	0.0320671	0.167047	0.0939003
'Used snuff*'	-0.328586	-0.0916225	0.0278822	0.0488691	0.0616129	0.0305824
'Days had at least 1 drink of alcohol'	0.308317	0.258355	-0.0787341	0.00454602	0.0567309	0.00247538
'Had 5+ alcoholic drinks*'	0.290682	0.0756138	0.260439	-0.1381	0.00556348	-0.00247964
'Used marijuana*'	0.212135	0.228118	0.200852	0.171987	0.0882192	-0.094319
'Ridden with drunk driver *'	0.0606301	0.0225512	-0.0284317	-0.00456039	-0.156551	-0.170336
'Physically injured by boyfriend/girlfriend*'	0.0391577	-0.259293	-0.0864327	-0.0912287	-0.181977	-0.232679
'Injured from attempted suicide'	-0.0402502	-0.292717	-0.5697	-0.351632	-0.039461	-0.270861
'Times attempted suicide *'	-0.0475047	-0.254622	-0.554835	-0.321646	-0.0502421	-0.323561
'Age when first tried marijuana'	-0.121306	-0.169529	-0.125065	-0.111593	-0.268775	-0.340604
'Smoked marijuana'	-0.136858	-0.186021	-0.158757	-0.105679	-0.276241	-0.359232
'Has ever smoked'	-0.451913	-0.723922	-0.37016	-0.228823	-0.233299	-0.420833
'Ever had sex '	-0.187282	-0.494113	-0.230658	-0.337759	-0.391702	-0.446586
'Forced to have sex '	-0.0592581	-0.468729	-0.316579	-0.137044	-0.138673	-0.519177
'Has taken pill to lose weight *'	-0.775301	-1.14541	-0.441799	-0.616636	-0.503663	-0.564258
'Has vomited to lose weight*'	-0.529618	-1.0548	-0.479123	-0.547541	-0.215644	-0.581182
'Made a plan to commit suicide ^'	-0.523665	-1.19053	-0.961894	-0.734758	-0.781887	-0.860376
'Has considered suicide ^'	-0.984532	-1.16767	-1.05844	-1.07941	-1.01765	-1.14713
'Has fasted to lose weight *'	-1.30541	-1.49436	-0.986944	-1.22983	-1.22983	-1.35851
'Does not wear sunscreen'	-1.14491	-1.25205	-1.01046	-0.985587	-1.32679	-1.4927
'Has felt sad/hopeless *'	-1.24253	-1.74076	-1.41904	-1.54935	-1.48457	-1.59463
'No vegetables+'	-1.70698	-1.64406	-1.41444	-1.40403	-1.45501	-1.74182
'Watches TV'	-1.62888	-2.15579	-1.42784	-2.12998	-2.01936	-1.84835
'No fruit+'	-1.67066	-1.6924	-1.84499	-1.45947	-1.44407	-1.94574
'No green salad+'	-1.63941	-1.88345	-1.58287	-1.58899	-2.03906	-2.2839
'No fruit juice+'	-1.74917	-1.97408	-1.7495	-1.88463	-2.10385	-2.29776
'No milk+'	-2.04963	-2.09224	-1.89071	-1.66228	-1.88468	-2.42038
'Does not go to PE class+'	-2.1602	-2.40621	-2.24621	-2.0683	-2.23506	-2.54907
'Has not participated in sports^'	-2.2807	-2.50607	-2.24589	-2.17408	-2.51112	-2.59373
'No carrots'	-2.04933	-2.29101	-2.00973	-1.99268	-2.21325	-2.62023
'No potatoes+'	-2.19509	-2.42577	-2.12931	-2.2286	-2.33878	-2.8635
